# Supplementary material for: Management of diabetes and associated costs in a complex humanitarian setting in the Democratic Republic of Congo: a retrospective cohort study
Source: PubMed Central journal article supplement — BMJ Open. 2019 Nov 24;9(11):e030176. doi: 10.1136/bmjopen-2019-030176 (PMC6887084; doi:10.1136/bmjopen-2019-030176), 2019-11-24
Supplement: bmjopen-2019-030176.draft_revisions.pdf [file bmjopen-2019-030176.draft_revisions.pdf]

# BMJ Open

BMJ Open is committed to open peer review. As part of this commitment we make the peer review history of every article we publish publicly available.

When an article is published we post the peer reviewers' comments and the authors' responses online. We also post the versions of the paper that were used during peer review. These are the versions that the peer review comments apply to.

The versions of the paper that follow are the versions that were submitted during the peer review process. They are not the versions of record or the final published versions. They should not be cited or distributed as the published version of this manuscript.

BMJ Open is an open access journal and the full, final, typeset and author-corrected version of record of the manuscript is available on our site with no access controls, subscription charges or pay-per-view fees (<http://bmjopen.bmj.com>).

If you have any questions on BMJ Open's open peer review process please email [info.bmjopen@bmj.com](mailto:info.bmjopen@bmj.com)

# BMJ Open

## Management of diabetes and associated costs in a complex humanitarian setting in the Democratic Republic of Congo

|                               |                                                                                                                                                                                                                                                                                                                                                                                                                                                                                                                                                                                                                                                                                                                                                                                                                                                                                                                                                                                                                                      |
|-------------------------------|--------------------------------------------------------------------------------------------------------------------------------------------------------------------------------------------------------------------------------------------------------------------------------------------------------------------------------------------------------------------------------------------------------------------------------------------------------------------------------------------------------------------------------------------------------------------------------------------------------------------------------------------------------------------------------------------------------------------------------------------------------------------------------------------------------------------------------------------------------------------------------------------------------------------------------------------------------------------------------------------------------------------------------------|
| Journal:                      | <i>BMJ Open</i>                                                                                                                                                                                                                                                                                                                                                                                                                                                                                                                                                                                                                                                                                                                                                                                                                                                                                                                                                                                                                      |
| Manuscript ID                 | bmjopen-2019-030176                                                                                                                                                                                                                                                                                                                                                                                                                                                                                                                                                                                                                                                                                                                                                                                                                                                                                                                                                                                                                  |
| Article Type:                 | Research                                                                                                                                                                                                                                                                                                                                                                                                                                                                                                                                                                                                                                                                                                                                                                                                                                                                                                                                                                                                                             |
| Date Submitted by the Author: | 01-Mar-2019                                                                                                                                                                                                                                                                                                                                                                                                                                                                                                                                                                                                                                                                                                                                                                                                                                                                                                                                                                                                                          |
| Complete List of Authors:     | <p>Ansbro, Éimhín; Médecins sans Frontières, Manson Unit; London School of Hygiene and Tropical Medicine Faculty of Epidemiology and Population Health, Centre for Global Chronic Conditions</p> <p>Biringanine, Michel; Medecins Sans Frontieres Operational Centre Amsterdam, Mweso Hospital</p> <p>Caleo, Grazia; Médecins sans Frontières, Manson Unit</p> <p>Prieto-Merino, David; London School of Hygiene and Tropical Medicine Faculty of Epidemiology and Population Health, Epidemiology of NCDs</p> <p>Sadique, Zia; London School of Hygiene and Tropical Medicine Faculty of Public Health and Policy, Health Services Research and Policy</p> <p>Perel, Pablo; London School of Hygiene and Tropical Medicine Faculty of Epidemiology and Population Health, Centre for Global Chronic Conditions</p> <p>Jobanputra, Kiran; Médecins sans Frontières, Manson Unit</p> <p>Roberts, Bayard; London School of Hygiene and Tropical Medicine Faculty of Public Health and Policy, Centre for Global Chronic Conditions</p> |
| Keywords:                     | <p>Health economics &lt; HEALTH SERVICES ADMINISTRATION &amp; MANAGEMENT, DIABETES &amp; ENDOCRINOLOGY, International health services &lt; HEALTH SERVICES ADMINISTRATION &amp; MANAGEMENT, Epidemiology &lt; TROPICAL MEDICINE, General diabetes &lt; DIABETES &amp; ENDOCRINOLOGY</p>                                                                                                                                                                                                                                                                                                                                                                                                                                                                                                                                                                                                                                                                                                                                              |
|                               |                                                                                                                                                                                                                                                                                                                                                                                                                                                                                                                                                                                                                                                                                                                                                                                                                                                                                                                                                                                                                                      |

SCHOLARONE™  
Manuscripts

1  
2  
3 1 **Title: Management of diabetes and associated costs in a complex humanitarian setting in the**  
4  
5 2 **Democratic Republic of Congo.**  
6  
7

8  
9 3 **Corresponding Author:**

10 4 Éimhín Ansbro,

11 5 Formerly: Manson Unit, Médecins sans Frontières, London, United Kingdom

12 6 Currently: London School of Hygiene & Tropical Medicine, Keppel Street, London WC1E 7HT, UK

13 7 Email: [eimhin.ansbro@lshtm.ac.uk](mailto:eimhin.ansbro@lshtm.ac.uk) Tel: +44(0) 207 927 2086

14 8 **Authors:**

- 15  
16 9 1. Éimhín Ansbro, Manson Unit, Médecins sans Frontières, London, United Kingdom; London  
17 10 School of Hygiene & Tropical Medicine, United Kingdom.  
18 11 2. Michel Biringanine, Médecins sans Frontières Operational Centre Amsterdam, Mweso  
19 12 Hospital, North Kivu, Democratic Republic of Congo  
20 13 3. Grazia Caleo, Manson Unit, Médecins sans Frontières, London, United Kingdom  
21 14 4. David Prieto-Merino, Department of Noncommunicable Disease Epidemiology, London  
22 15 School of Hygiene and Tropical Medicine, London, United Kingdom  
23 16 5. Zia Sadique, Department of Health Services Research and Policy, London School of Hygiene  
24 17 and Tropical Medicine, London, United Kingdom  
25 18 6. Pablo Perel, Centre for Global Chronic Conditions, London School of Hygiene and Tropical  
26 19 Medicine, London, United Kingdom  
27 20 7. Kiran Jobanputra, Manson Unit, Médecins sans Frontières, London, United Kingdom  
28 21 8. Bayard Roberts, Centre for Global Chronic Conditions, London School of Hygiene and  
29 22 Tropical Medicine, London, United Kingdom (Bayard.Roberts@lshtm.ac.uk)

30  
31  
32  
33  
34  
35  
36  
37  
38  
39  
40  
41  
42  
43  
44  
45  
46  
47  
48  
49 24 **Word Count: 2879**  
50  
51  
52

53 26 **Keywords:** Democratic Republic of Congo, Sub-Saharan Africa, diabetes, hypertension,  
54 27 noncommunicable disease, humanitarian, conflict, care model, management, programme, chronic  
55 28 care, outpatient, hospital care, task shifting, cost, economic.  
56  
57  
58  
59  
60

## 30 Abstract

31 **Objective:** We aimed to evaluate an Integrated Diabetic Clinic within a Hospital Outpatient  
32 Department (IDC-OPD) in a complex humanitarian setting. Specific objectives were to: (i) analyse  
33 diabetes management outcomes; (ii) examine the association of key insecurity and related  
34 programmatic events with diabetes outcomes; and (iii) analyse IDC-OPD programme costs.

35 **Design:** A cohort analysis of routine outcome data collected between January 2014 and February  
36 2017; and analysis of programme costs for 2014/15.

37 **Setting:** An outpatient diabetes programme (IDC-OPD) in Mweso hospital, supported by Médecins  
38 sans Frontières, located in an insecure and impoverished rural area in North Kivu, Democratic  
39 Republic of Congo.

40 **Participants:** Diabetes patients using the IDC-OPD.

41 **Outcome measures:** Clinical outcome trends (glycaemic, blood pressure control); association of key  
42 security and related programmatic events with clinical outcomes; and incremental programme costs.

43 **Results:** Of 243 enrolled diabetes patients, 44.6% were women, median age was 45 (IQR 32-56);  
44 51.4% were classified Type 2. Visit numbers and visit interval increased on introduction of IDC-OPD  
45 but decreased when insecurity led to service scale-back and subsequent suspension. Clinical control  
46 rates during initial service scale-back were similar to the preceding period of full implementation.  
47 Later, patients were less likely to achieve control due to exhaustion of medications but this improved  
48 again on service resumption. Total costs decreased by 20% from 2014 (€32,121) to 2015 (€26,410).  
49 Annual cost per patient dropped from €417 in 2014 to €183 in 2015 due to reduced supply costs and  
50 increased patient throughput.

51 **Conclusions:** Diabetes care for stable patients in humanitarian settings is possible. Costs were less  
52 than those for chronic HIV care in low-income settings. Findings indicate the programme could be

1  
2  
3 53 simplified to involve drug collection with nurse-led, algorithm-guided treatment adjustment and  
4  
5 54 strengthened emergency preparedness. Further research is required to define a minimum effective  
6  
7  
8 55 treatment package for diabetes in complex humanitarian settings.  
9  
10  
11 56

## 13 57 **Article Summary**

- 16 58 • This is the first study of its kind to examine diabetes outcomes and programme costs in a  
17 59 complex humanitarian setting in sub-Saharan Africa.
- 19 60 • Logistic regression was used to estimate the effect of insecurity and related programmatic  
20 61 changes on clinical outcomes.
- 22 62 • The study was limited by the relatively small sample size and lack of control group for  
23 63 comparison.
- 25 64 • The costing analysis was descriptive only and so cost-effectiveness of the programme could  
26 65 not be assessed.

27  
28  
29  
30 66  
31  
32  
33  
34  
35  
36  
37  
38  
39  
40  
41  
42  
43  
44  
45  
46  
47  
48  
49  
50  
51  
52  
53  
54  
55  
56  
57  
58  
59  
60

1  
2  
3  
4 67 **Title: Management of diabetes and associated costs in a complex**  
5  
6 68 **humanitarian setting in the Democratic Republic of Congo**  
7  
8  
9

10 69

11  
12  
13 70 **Background**  
14

15 71 Over the past 40 years, the prevalence of diabetes has increased sharply worldwide, particularly in  
16 72 low and middle income countries.[1] However, data are scarce from conflict-affected countries,  
17 73 particularly those in Central, West and East Africa.[1] Humanitarian actors have been slow to  
18 74 prioritise diabetes treatment in disaster and post-conflict settings despite reporting increasing  
19 75 presentations of patients within their programmes.[2–4] This is due to lack of knowledge on local  
20 76 diabetes prevalence and needs, limited research on diabetes management or outcomes in  
21 77 emergency settings; and a lack of programmatic and policy guidance to support diabetes care in  
22 78 humanitarian settings.[2,5–7] North Kivu in the Democratic Republic of Congo (DRC) is one such  
23 79 complex humanitarian setting, where diabetes prevalence (estimated at between 4 and 5.4%) is  
24 80 increasing in the context of a health system weakened by prolonged conflict.[8–10]  
25  
26  
27  
28  
29 81 Since 2008, Médecins sans Frontières (MSF) has supported healthcare delivery in Mweso, North  
30 82 Kivu, DRC, in collaboration with the Ministry of Health. North Kivu, with an estimated population of  
31 83 365,000, is a rural, impoverished area bordering Rwanda. It remains a flash point in the on-going  
32 84 conflict in the DRC and hosts 17 internally displaced person camps. MSF supports health services in 4  
33 85 out of 23 Primary Health Care clinics and in Mweso hospital within Masisi District. Mweso hospital  
34 86 serves a catchment area of approximately 145,000 people, with about 65,000 beneficiaries living in  
35 87 the immediate vicinity of the hospital.  
36  
37  
38  
39  
40  
41  
42  
43  
44  
45  
46  
47  
48  
49  
50  
51  
52  
53  
54

55 88 In response to growing patient and provider needs, MSF implemented a context-adapted, hospital-  
56 89 based diabetes programme in March 2015, the Integrated Diabetic Clinic within Hospital Outpatient  
57  
58  
59  
60

1  
2  
3 90 Department (IDC-OPD) in place of the ad hoc care previously undertaken. Intermittent  
4  
5 91 deteriorations in security led to temporary scaling back or suspension of the programme and  
6  
7 92 restricted patients' movement.  
8  
9

10 93 The IDC-OPD was a nurse-led, multi-disciplinary model, based on locally adapted clinical guidelines,  
11  
12 94 patient counselling materials and data collection tools, accompanied by 3 days of specialist  
13  
14 95 training.[11] The clinic team included: a nurse supervisor, nursing assistant, two doctors, a  
15  
16 96 nutritionist, and education and psychosocial support officers. Diabetes was diagnosed according to  
17  
18 97 World Health Organization (WHO) guidelines using repeated fasting capillary glucose. Most patients  
19  
20 98 were identified as diabetic and enrolled after acute hospital presentation, while some were  
21  
22 99 identified via the Mweso outpatient department or referring primary care clinics.  
23  
24  
25

26  
27 100 Patients received a detailed enrolment assessment, monthly nurse-led follow-up and 6-monthly  
28  
29 101 medical review, with nutrition and psychosocial support. Each patient was given a clinic-held patient  
30  
31 102 file and patient-held passport to facilitate safe passage. Clinical guidelines were adapted from MSF,  
32  
33 103 WHO and other international guidance. Patient educational tools were adapted from Santé  
34  
35 104 Diabète,[12] a Malian Non-Governmental Organisation, and medications were those included on  
36  
37 105 MSF's Essential Drugs List. Insulin doses were adjusted using single fasting capillary blood glucose  
38  
39 106 readings and patients' reported symptoms of hypo- or hyperglycaemia in the absence of home  
40  
41 107 glucose monitoring.  
42  
43  
44

45  
46 108 A mixed methods evaluation of the Mweso IDC-OPD programme was undertaken by MSF (with  
47  
48 109 qualitative component of the evaluation exploring patient and provider challenges, presented  
49  
50 110 elsewhere [13]). Here, we report quantitative data on programmatic and clinical outcomes and  
51  
52 111 programme costs. The overall objective of this study was evaluate the MSF IDC-OPD Programme in  
53  
54 112 the complex humanitarian setting of North Kivu, DRC. The specific objectives were to: (i) analyse  
55  
56  
57  
58  
59  
60

1  
2  
3 113 diabetes management outcomes; (ii) examine the association of key insecurity and related  
4  
5 114 programmatic events with diabetes outcomes; and (iii) analyse IDC-OPD programme costs.  
6  
7

## 8 9 115 **Methods**

10  
11 116 For the outcome analysis, we conducted a retrospective analysis of routine data of enrolled adults  
12  
13 117 aged  $\geq 18$  years from January 2014 to February 2017, examining trends in diabetes outcomes and  
14  
15 118 their association with key programmatic events. The study period was divided into five phases,  
16  
17 119 defined by programmatic changes or periods of heightened insecurity (which impacted service  
18  
19 120 delivery due to staff evacuation, supply chain interruption and reduced patient access). Period T1  
20  
21 121 refers to ad-hoc care delivered before introduction of the IDC-OPD programme (T2). Security  
22  
23 122 incidents in December 2015 prompted a period of service suspension (nurse-only care, with drug  
24  
25 123 pick-ups, glucose testing and minimal treatment adjustments) (S1). Complete suspension followed  
26  
27 124 once drug stocks were exhausted (S2). Limited service resumed in April (R1) until full service  
28  
29 125 recommenced from September 2016 (R2) (Table 1).  
30  
31  
32  
33

34 126 Table 1. Study Periods for Evaluation of IDC-OPD Programme, Mweso, DRC

| Study Period           | Description                                                                                                 | Dates                      |
|------------------------|-------------------------------------------------------------------------------------------------------------|----------------------------|
| <b>Training 1 (T1)</b> | Ad hoc diabetes service following basic staff training                                                      | 01/01/2014 –<br>14/03/2015 |
| <b>Training 2 (T2)</b> | IDC-OPD implemented following formal staff training                                                         | 15/03/2015 –<br>14/12/2015 |
| <b>Suspend 1 (S1)</b>  | Reduction of clinical supervision but monthly drug refills were provided until buffer stocks were exhausted | 15/12/2015 –<br>31/01/2016 |
| <b>Suspend 2 (S2)</b>  | No clinical supervision or drugs were provided                                                              | 01/02/2016 –<br>14/04/2016 |
| <b>Resume 1 (R1)</b>   | The service was resumed without medical                                                                     | 15/04/2016 –               |



|                      |                                                          |                         |
|----------------------|----------------------------------------------------------|-------------------------|
|                      | supervision or quality control                           | 31/08/2016              |
| <b>Resume 2 (R2)</b> | Full service resumed until end of data collection period | 01/09/2016 – 09/02/2017 |

127

## 128 Data

129 Patients were given a unique identification number on enrolment. Data were recorded in paper-  
 130 based clinic-held files by clinical staff and transferred to an electronic database by a trained data  
 131 entry operator on a weekly basis. Missing data were discussed with the nurse manager and gaps  
 132 were filled during follow-up clinical visits. Single data entry was performed on a password-protected  
 133 Microsoft Excel software application specifically developed by MSF for this programme. Anonymised  
 134 exports were transferred to the study team on a monthly basis.

135 Demographic data on patients' age, gender, occupation, and village of residence were recorded on  
 136 enrolment. Cardiovascular risk factors (smoking status, current alcohol use), family history of  
 137 diabetes and year of diabetes diagnosis were recorded. Clinical parameters: body mass index (BMI),  
 138 blood pressure (BP) measured by manual sphygmomanometer according to local MSF protocols [11],  
 139 fasting capillary blood glucose (FBG); prescribed diabetes drugs [insulin and/or oral hypoglycaemic  
 140 drugs (OHGs)]; and diabetes classification (Type I, Type II or other) were recorded at each clinical  
 141 encounter. Medical review at enrolment and six monthly thereafter was recorded, including  
 142 biochemical markers (serum creatinine) and examination for complications (visual acuity, cataract,  
 143 proteinuria, foot check). Numbers of deaths, transfers out of the area and delays in attendance were  
 144 also documented. The key programme and clinical outcome measured used in the analysis are  
 145 shown in Table 2.

146

147 Table 2: Outcome measures used to determine effect of different programme periods on  
 148 programme delivery and intermediate clinical outcomes

| Category                              | Variable                                                                                                                                                                                                                                                                                                                                                                                        |
|---------------------------------------|-------------------------------------------------------------------------------------------------------------------------------------------------------------------------------------------------------------------------------------------------------------------------------------------------------------------------------------------------------------------------------------------------|
| <b>Frequency of Visits</b>            | Number of visits per month<br>Number of patients seen per month<br>Average visits per patient per month<br>Average days from previous visit<br>Missing data for BP / glycaemia per visit                                                                                                                                                                                                        |
| <b>Clinical Effectiveness</b>         | Proportion of visits per month where patients' BP is at target (< 140/90 mmHg)<br>Proportion of visits per month where patients' glycaemia is at target (> 4.2 and ≤ 8.3 mmol/L)                                                                                                                                                                                                                |
| <b>Effect of insulin prescription</b> | Proportion of visits per month where BP of patients prescribed* OHG only is at target<br>Proportion of visits per month where BP of patients prescribed* insulin (+/- OHG) is at target<br>Proportion of visits per month where glycaemia of patients prescribed* OHG only is at target<br>Proportion of visits per month where glycaemia of patients prescribed* insulin (+/-OHG) is at target |

149 \*Note: "Prescribed" refers to the prescription record from the previous visit.

150

## 151 Analysis

152 Basic demographics were analysed using mean and median and were presented with inter-quartile  
 153 ranges. We assessed the relationship of different study periods with the frequency of visits and the

1  
2  
3 154 impact of study periods on intermediate clinical outcomes i.e. per visit attainment of blood pressure  
4  
5 155 (< 140/90 mmHg) and glycaemic (> 4.2 and ≤ 8.3 mmol/L) targets.  
6  
7

8 156 To estimate the effect of a period change we calculated the odds ratio (OR) of the odds of having the  
9  
10 157 biomarker under control in a visit in the new period ( $t$ ) over the odds of having the biomarker  
11  
12 158 controlled in a visit in the previous period ( $t-1$ ):  $OR_t = Odds_t / Odds_{t-1}$ . If  $OR_t > 1$ , this meant that the  
13  
14 159 chances of the biomarker being under control in a visit in period  $t$  was greater than the chances of  
15  
16 160 the biomarker being under control in a visit in the previous period ( $t-1$ ) (but not necessarily than  
17  
18 161 other periods,  $t-2$ ,  $t-3$ , etc.). Likewise,  $OR_t < 1$  implied a reduction in the chances of having the  
19  
20 162 biomarker under control in a visit during period  $t$  compared to a visit during the previous period ( $t-$   
21  
22 163  $1$ ). To estimate these OR we ran a logistic model with period as a categorical variable, suitably  
23  
24 164 coded, and adjusted for sex, age (and square and cube terms) and number of visits of the patient  
25  
26 165 (and square term).  
27  
28  
29

30  
31 166 Missing data: Our main analysis used only complete data. Few outcome variable data were missing:  
32  
33 167 less than 3% in BP control (most of it in the pre-training period) and less than 0.3% for glycaemic  
34  
35 168 control (Supplement SM1). There were no missing data for date of visit, sex or age.  
36  
37  
38

39 169

#### 40 41 170 **Costing data and analysis**

42  
43 171 For the descriptive cost analysis we took a health services perspective. Key cost items identified from  
44  
45 172 a field visit were grouped into: (a) medicine, (b) supplies, and (c) staff time. Monthly resource use  
46  
47 173 and unit cost data were collected from clinic records (Supplement SM3). Monthly costs for each item  
48  
49 174 were annualised; total cost, cost per visit and cost per patient were reported in Euro (€) for 2014 and  
50  
51 175 2015.  
52  
53

54 176 The study was approved by the Ministry of Health of North Kivu Province and the MSF and London  
55  
56 177 School of Hygiene and Tropical Medicine Ethics Review Boards.  
57  
58  
59  
60

## 178 Patient and Public Involvement

179 Patients were not involved in the design or conduct of this study.

## 180 Results

181 Between January 1<sup>st</sup> 2014 and February 9<sup>th</sup> 2017, 243 patients were enrolled in the IDC-OPD  
182 programme (Supplement SM2). Median age was 45 years (IQR 32 – 56); 44.6% of the cohort was  
183 female. For adults  $\geq 18$  years ( $n=219$ ), mean BMI was 21.3 kg/m<sup>2</sup> and 31.1% were underweight (BMI  
184  $< 18.5$  kg/m<sup>2</sup>). On enrolment, 8.2% were current smokers; 24.4% reported recent alcohol intake;  
185 self-reported medical history included: 9.1% hypertension, 2.2 % CVD, 2.7% tuberculosis (TB) and  
186 8.7% malnutrition. Half were classified clinically as Type 2 diabetic (51%;  $n=125$ ); 26% ( $n=62$ ) as Type  
187 1; and 23% ( $n=56$ ) were either unclassified or classed as “other” (Supplement SM2).

## 188 Trends in outcomes and impact of programmatic events

189 Numbers of visits and appointment intervals increased after the introduction of the systematic  
190 approach to diabetes care, which included monthly review appointments for stable patients (T2)  
191 (Figure 1; Supplement SM4). During the period of scaled back service (S1), visit numbers initially  
192 climbed while the visit interval decreased, which may reflect increased visit frequency due to short-  
193 term drug supplies. Once drug buffer stock was exhausted, visit numbers dropped off sharply.  
194 Patients may have avoided or were prevented from attending due to security conditions.

195  
196 Figure 1: Average number of days from previous visit per month for Mweso IDC-OPD service

197

198 BP control was consistently better than glycaemic control (of note, patients without diagnosed  
199 hypertension were included in the analysis) (Figure 2). By period T2, approximately 80% of visits  
200 achieved BP and 60% achieved glycaemic control. There was a notable drop in control of both

1  
2  
3 201 parameters during programme suspension with a gradual improvement on resumption. Blood  
4  
5 202 pressure control was consistently better, while glycaemic control was consistently worse, in patients  
6  
7 203 prescribed insulin (+/- OHGs) compared with those prescribed OHGs alone (Supplement SM5), which  
8  
9 204 may be because the former group contained relatively young Type 1 and malnutrition-related  
10  
11  
12 205 diabetics.

13  
14  
15 20616  
17 207 Figure 2: Proportion of visits with BP or glycaemia at target by month, Mwesio IDC-OPD service18  
19  
20 208

21  
22  
23 209 The results of the odds ratio (OR) calculations were unexpected. Odds of attaining BP control  
24  
25 210 appeared to worsen following implementation of the formal IDC-OPD programme (T2 vs. T1), while  
26  
27 211 odds of attaining glucose control improved, perhaps because care was initially focussed on glucose  
28  
29 212 control (Supplement SM6). On scaling back the service (S1), control of both parameters seemed to  
30  
31 213 improve, possibly because the service itself or the subset of patients reaching it during the insecure  
32  
33 214 period were somehow different. Once medications supplies were exhausted (S2), control of both  
34  
35 215 parameters seemed to worsen, but control was regained on service resumption. Stratifying by  
36  
37 216 insulin prescription showed similar results (Supplement SM5).

### 40 41 217 **Costs of providing diabetes care**

42  
43  
44 218 The total costs of diabetes care in 2014 and 2015 were approximately €32,000 and €26,000  
45  
46 219 respectively (Table 3). Supplies were the major driver of costs. The main costs in 2014 were for latex  
47  
48 220 gloves, glucometers and glucometer strips, and in 2015 were glucometers, strips and lancets  
49  
50 221 (Supplement SM3). While medication costs increased in 2015 relative to 2014, total costs decreased,  
51  
52 222 largely driven by reduced excess consumption of latex gloves post-training. The cost per-patient per-  
53  
54 223 year dropped from €417 to €183 and the cost per-visit halved from €51 to €24. This was due to the  
55  
56 224 combined effect of increased patient throughput and lower costs in 2015.

225

226 Table 3. Costs (€) of diabetes care in 2014 and 2015, Mweso IDC-OPD service

| Cost category            | 2014          | % 2014 costs | 2015          | % 2015 costs |
|--------------------------|---------------|--------------|---------------|--------------|
| Medicine costs           | 5,202         | 16%          | 7,746         | 29%          |
| Supply costs             | 25,435        | 79%          | 17,180        | 65%          |
| Staff costs              | 1,484         | 5%           | 1,484         | 6%           |
| <b>Total costs</b>       | <b>32,121</b> | 100%         | <b>26,410</b> | 100%         |
| <b>Costs per visit</b>   | <b>51</b>     |              | <b>24</b>     |              |
| <b>Costs per patient</b> | <b>417</b>    |              | <b>183</b>    |              |

227

228

229 **Discussion**

230 The programme encountered challenges related to insecurity impeding patient access and continuity  
 231 of care; patient and provider difficulties with insulin management; and lack of evidence or guidance  
 232 in managing what we believed to be malnutrition-related diabetes. Despite this, the findings show  
 233 that glycaemic control was similar or better to that documented in other humanitarian or low-  
 234 income settings (although different targets were used) and, while it was positively impacted by  
 235 programmatic changes, control clearly deteriorated during periods of heightened insecurity.[14] Our  
 236 findings indicate that, in a population previously undergoing regular supervision, a simplified nurse-  
 237 provided, algorithm-driven service with consistent medication supply may be as effective as close  
 238 medical supervision in maintaining disease control, particularly during periods of service  
 239 interruption. Medical input could thus be focused on achieving glycaemic control in patients  
 240 prescribed insulin, who appeared most affected by service interruption.

1  
2  
3 241 We suggest that chronic disease programmes in unstable settings should engage in emergency  
4  
5 242 preparedness, learning from the experience of HIV programmes in similar settings.[20] Preparation  
6  
7 243 may include: emergency response planning; patient triage by vulnerability; provision of patient-held  
8  
9 244 treatment plans and emergency kits; building staff capacity to allow flexibility of roles in crises;  
10  
11 245 establishing alternative communication networks, including technology-facilitated patient support;  
12  
13 246 and medication stockpiling and secure storage.[4,20,21]  
14  
15  
16

17 247 The relatively poorer glycaemic control in insulin-prescribed patients may reflect either disease  
18  
19 248 severity or the challenges associated with insulin therapy. Adherence to daily insulin injections is  
20  
21 249 difficult anywhere; in Mweso, patients are challenged by the security, financial and geographical  
22  
23 250 barriers to accessing medications and the recommended diabetes diet.[13] Adjusting insulin doses  
24  
25 251 based on single fasting glucose readings and patients' reported symptoms proved challenging for  
26  
27 252 clinicians.  
28  
29  
30

31 253 There is limited, although growing, evidence on the incidence, prevalence and characterisation of  
32  
33 254 diabetes in Sub-Saharan Africa, which our findings broadly reflect.[15] Several reviews have  
34  
35 255 described controversial "atypical" forms of diabetes, including "*malnutrition-related diabetes*" in  
36  
37 256 Sub-Saharan Africa. [9,16] Local prevalence studies support its existence in the DRC, which is in  
38  
39 257 keeping with the high proportion of underweight adults and "unclassified" diabetics in our  
40  
41 258 cohort.[10,17] Little evidence exists to guide either malnutrition-related diabetes care or the  
42  
43 259 effective management of insulin in humanitarian settings, particularly in the absence of home or  
44  
45 260 community-based glycaemia testing.[2,5]  
46  
47  
48  
49

50 261 The introduction of the IDC-OPD programme, and associated training, contributed to reducing total  
51  
52 262 costs of care by approximately 20% and per patient per year (PPPY) costs by 44% from 2014 to 2015.  
53  
54 263 To our knowledge, there is no available literature to compare costs of diabetes care delivered in a  
55  
56 264 similar setting. However, the 2015 PPPY cost reported here is far lower than that reported by  
57  
58  
59  
60

1  
2  
3 265 PEPFAR and others to deliver chronic HIV care programmes in low and middle income Sub-Saharan  
4  
5 266 Africa countries.[18,19]  
6  
7  
8 267 Future research is needed in complex humanitarian settings to evaluate simplified, task-shared  
9  
10 268 models of diabetes care; to optimise insulin management without regular finger-stick glycaemia  
11  
12 269 testing; and to evaluate emergency preparedness plans and technology-facilitated remote patient  
13  
14 270 support.[2,4,7,9,21] This should include the cost-effectiveness of different models of diabetes care.  
15  
16  
17

### 271 **Limitations**

272 Our study was limited by the relatively small sample size and lack of control group for comparison.  
273 We did not explore per patient control of clinical parameters over time, control by type of diabetes  
274 (or by age), or appropriateness of insulin prescribing. Care for gestational diabetes was not  
275 addressed since this took place within antenatal care. Our costing analysis was descriptive and thus  
276 we cannot comment on the cost-effectiveness of the programme. Costing data are presented as  
277 average annual costs and did not explore the impact of the various programme periods on costs or  
278 patient-level costs. While our findings may not be generalizable to other complex humanitarian  
279 settings or to other providers' diabetes programmes in the DRC, our study contributes knowledge on  
280 key challenges and suggests solutions, which may be more broadly applicable.

### 281 **Conclusion**

282 Our results help develop the sparse knowledge on prevalence and characterisation of diabetes in  
283 Sub-Saharan Africa. They demonstrate that diabetes care is feasible even in complex humanitarian  
284 emergencies, and at a cost that is lower than chronic HIV care. The results also indicate that the  
285 Mweso IDC-OPD programme could be further simplified to involve drug collection along with nurse-  
286 led, algorithm-guided treatment adjustment. We suggest that chronic disease programmes in  
287 unstable settings should engage in emergency preparedness, learning from the experience of HIV  
288 programmes in similar settings. Future research is needed to evaluate simplified, task-shared models



1  
2  
3 289 of diabetes care and management; and to evaluate emergency preparedness plans and technology-  
4  
5 290 facilitated remote patient support.  
6  
7  
8  
9 291  
10  
11

12 292 **List of Abbreviations**  
13  
14

|        |         |                                                                  |
|--------|---------|------------------------------------------------------------------|
| 15 293 | BMI     | Body Mass Index                                                  |
| 16     |         |                                                                  |
| 17 294 | BP      | Blood Pressure                                                   |
| 18     |         |                                                                  |
| 19 295 | DM      | Diabetes Mellitus                                                |
| 20     |         |                                                                  |
| 21 296 | DRC     | Democratic Republic of Congo                                     |
| 22     |         |                                                                  |
| 23 297 | HIV     | Human Immunodeficiency Virus                                     |
| 24     |         |                                                                  |
| 25 298 | IDC-OPD | Integrated Diabetic Clinic within Hospital Outpatient Department |
| 26     |         |                                                                  |
| 27 299 | MSF     | Médecins sans Frontières                                         |
| 28     |         |                                                                  |
| 29 300 | OHG     | Oral Hypoglycaemic Drugs                                         |
| 30     |         |                                                                  |
| 31 301 | OR      | Odds Ratio                                                       |
| 32     |         |                                                                  |
| 33 302 | PPPY    | Per Patient Per Year                                             |
| 34     |         |                                                                  |

35  
36  
37 303  
38  
39  
40 304  
41  
42 305  
43  
44  
45  
46  
47  
48  
49  
50  
51  
52  
53  
54  
55  
56  
57  
58  
59  
60

1  
2  
3 306 **Declarations**  
4  
5

6  
7 307 ***Ethics approval and consent to participate***  
8  
9

10 308 This study was approved by the Ministry of Health of North Kivu Province, DRC, by the MSF Ethics  
11  
12 309 Review Board, and the Ethics Committee of the London School of Hygiene and Tropical Medicine.  
13  
14 310 Information sheets on the clinic walls provided details of the evaluation; no specific consent was  
15  
16 311 sought from patients for use of their routine clinical data.  
17  
18  
19

20 312 ***Authors' contributions***  
21  
22

23  
24 313 KJ and BR were involved in study conception; EA, GC, KJ, DPM, PP and BR contributed to study  
25  
26 314 design and interpretation of data. DPM and ZS analysed the data. MB contributed to data collection.  
27  
28 315 EA drafted the manuscript and all authors reviewed drafts and approved the final version.  
29  
30

31 316 **Acknowledgements**  
32  
33

34 317 We gratefully acknowledge the staff and patients of the MSF IDC-OPD programme for their  
35  
36 318 contribution to this study. We thank Sarah Venis for her helpful review of the article. This work was  
37  
38 319 presented at MSF Scientific Days Conference in London, May 2018.  
39  
40

41 320 **Competing Interests**  
42  
43

44 321 The authors declare that they have no competing interests.  
45  
46

47 322 **Data Sharing**  
48  
49

50 323 The datasets are available from MSF on request by researchers who fulfil certain criteria and under  
51  
52 324 the auspices of a data sharing agreement.  
53  
54

55 325 **Funding**  
56  
57

58 326 This study was funded by Médecins sans Frontières.  
59  
60

327 **References**

- 328 1 NCD Risk Factor Collaboration (NCD-RisC). Worldwide trends in diabetes since 1980: a pooled  
329 analysis of 751 population-based studies with 4.4 million participants. *Lancet (London,  
330 England)* 2016;**387**:1513–30. doi:10.1016/S0140-6736(16)00618-8
- 331 2 Demaio A, Jamieson J, Horn R, *et al.* Non-Communicable Diseases in Emergencies: A Call to  
332 Action. *PLoS Curr* Published Online First: 2013.  
333 doi:10.1371/currents.dis.53e08b951d59ff913ab8b9bb51c4d0de
- 334 3 Roberts B, Patel P, McKee M. Noncommunicable diseases and post-conflict countries. *Bull  
335 World Health Organ* 2011;**90**:2–2A. doi:10.2471/BLT.11.098863
- 336 4 Besançon S, Fall I-S, Doré M, *et al.* Diabetes in an emergency context: the Malian case study.  
337 *Confl Health* 2015;**9**:15. doi:10.1186/s13031-015-0042-9
- 338 5 Ruby A, Knight A, Perel P, *et al.* The Effectiveness of Interventions for Non-Communicable  
339 Diseases in Humanitarian Crises: A Systematic Review. *PLoS One* 2015;**10**:e0138303.  
340 doi:10.1371/journal.pone.0138303
- 341 6 Roberts B, Patel P, McKee M. Noncommunicable diseases and post-conflict countries. *Bull  
342 World Health Organ* 2012;**90**:2, 2A. doi:10.2471/BLT.11.098863
- 343 7 Jobanputra K, Boule P, Roberts B, *et al.* Three Steps to Improve Management of  
344 Noncommunicable Diseases in Humanitarian Crises. *PLOS Med* 2016;**13**:e1002180.  
345 doi:10.1371/journal.pmed.1002180
- 346 8 Whiting DR, Guariguata L, Weil C, *et al.* IDF diabetes atlas: global estimates of the prevalence  
347 of diabetes for 2011 and 2030. *Diabetes Res Clin Pract* 2011;**94**:311–21.  
348 doi:10.1016/j.diabres.2011.10.029
- 349 9 Atun R, Davies JI, Gale EAM, *et al.* Diabetes in sub-Saharan Africa: from clinical care to health

- 1  
2  
3 350 policy. *Lancet Diabetes Endocrinol* 2017;**5**:622–67. doi:10.1016/S2213-8587(17)30181-X  
4  
5  
6 351 10 Muyer MT, Muls E, Mapatano MA, *et al.* Diabetes and intermediate hyperglycaemia in  
7  
8 352 Kisantu, DR Congo: a cross-sectional prevalence study. *BMJ Open* 2012;**2**:e001911.  
9  
10 353 doi:10.1136/bmjopen-2012-001911  
11  
12  
13 354 11 Jobanputra K, Ansbro É. MSF OCA Mweswo Guide de diabète pour patients ambulatoires.  
14  
15 355 2015. <http://fieldresearch.msf.org/msf/handle/10144/619307> (accessed 07 Jan 2019).  
16  
17  
18 356 12 ONG Santé Diabète / NGO Health Diabetes - Home. <https://santediabete.org/en/> (accessed  
19  
20 357 20 Aug 2018).  
21  
22  
23 358 13 Murphy A, Biringanine M, Roberts B, *et al.* Diabetes care in a complex humanitarian  
24  
25 359 emergency setting: a qualitative evaluation. *BMC Health Serv Res* 2017;**17**:431.  
26  
27 360 doi:10.1186/s12913-017-2362-5  
28  
29  
30  
31 361 14 Cohen DB, Allain TJ, Glover S, *et al.* A survey of the management, control, and complications  
32  
33 362 of diabetes mellitus in patients attending a diabetes clinic in Blantyre, Malawi, an area of high  
34  
35 363 HIV prevalence. *Am J Trop Med Hyg* 2010;**83**:575–81. doi:10.4269/ajtmh.2010.10-0104  
36  
37  
38 364 15 Hall V, Thomsen RW, Henriksen O, *et al.* Diabetes in Sub Saharan Africa 1999-2011:  
39  
40 365 Epidemiology and public health implications. a systematic review. *BMC Public Health*  
41  
42 366 2011;**11**:564. doi:10.1186/1471-2458-11-564  
43  
44  
45  
46 367 16 A sub-Saharan African perspective of diabetes.  
47  
48 368 file:///C:/Users/DAnsbro/Downloads/0f317533c181fe640b000000.pdf (accessed 30 Jan  
49  
50 369 2015).  
51  
52  
53 370 17 Hightower JD, Hightower CM, Vázquez BYS, *et al.* Incident prediabetes/diabetes and blood  
54  
55 371 pressure in urban and rural communities in the Democratic Republic of Congo. *Vasc Health*  
56  
57 372 *Risk Manag* 2011;**7**:483–9. doi:10.2147/VHRM.S22707  
58  
59  
60

- 1  
2  
3 373 18 Bikilla A, Jerene D, Robberstad B, *et al.* Cost estimates of HIV care and treatment with and  
4  
5 374 without anti-retroviral therapy at Arba Minch Hospital in southern Ethiopia. *Cost Eff Resour*  
6  
7 375 *Alloc* 2009;**7**:6. doi:10.1186/1478-7547-7-6  
8  
9  
10 376 19 2013 Report on Costs of Treatment in the President's Emergency Plan for AIDS Relief  
11  
12 377 (PEPFAR) Background. <https://www.pepfar.gov/documents/organization/212059.pdf>  
13  
14 378 (accessed 21 Dec 2017).  
15  
16  
17 379 20 Culbert H, Tu D, O'Brien DP, *et al.* HIV Treatment in a Conflict Setting: Outcomes and  
18  
19 380 Experiences from Bukavu, Democratic Republic of the Congo. *PLoS Med* 2007;**4**:e129.  
20  
21 381 doi:10.1371/journal.pmed.0040129  
22  
23  
24 382 21 Slama S, Kim H-J, Roglic G, *et al.* Care of non-communicable diseases in emergencies. *Lancet*  
25  
26 383 (*London, England*) 2017;**389**:326–30. doi:10.1016/S0140-6736(16)31404-0  
27  
28  
29  
30  
31  
32  
33  
34  
35  
36  
37  
38  
39  
40  
41  
42  
43  
44  
45  
46  
47  
48  
49  
50  
51  
52  
53  
54  
55  
56  
57  
58  
59  
60

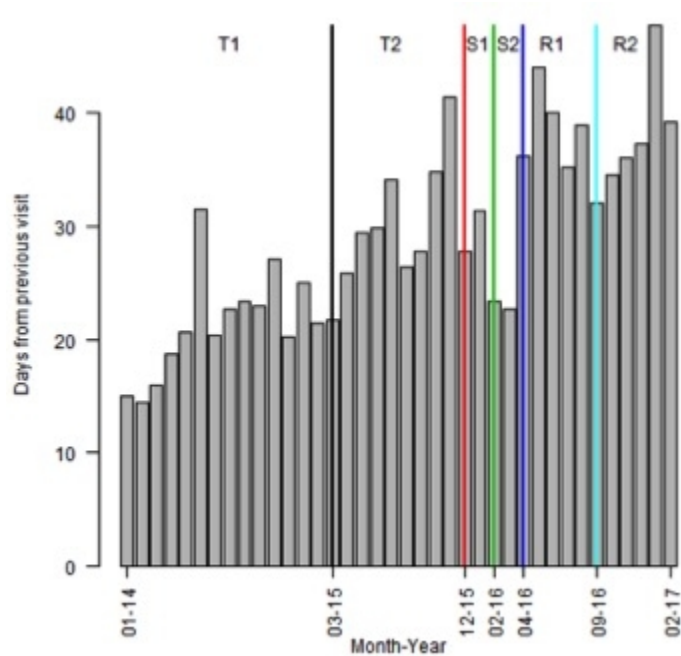

Figure 1: Average number of days from previous visit per month for Mweso IDC-OPD service

130x118mm (72 x 72 DPI)

1  
2  
3  
4  
5  
6  
7  
8  
9  
10  
11  
12  
13  
14  
15  
16  
17  
18  
19  
20  
21  
22  
23  
24  
25  
26  
27  
28  
29  
30  
31  
32  
33  
34  
35  
36  
37  
38  
39  
40  
41  
42  
43  
44  
45  
46  
47  
48  
49  
50  
51  
52  
53  
54  
55  
56  
57  
58  
59  
60

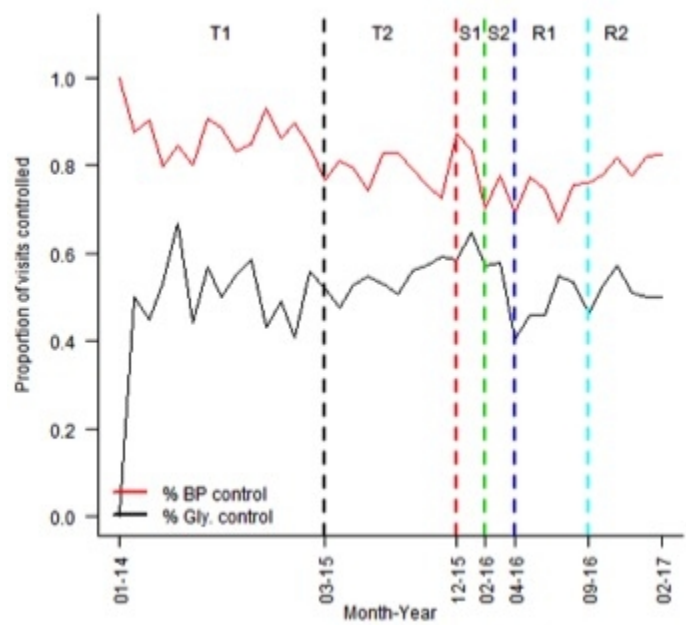

Figure 2: Proportion of visits with BP or glycaemia at target by month, Mweso IDC-OPD service

127x113mm (72 x 72 DPI)

SM1. Proportion of visits with missing data for either blood pressure or glycaemia measurements, IDC-OPD Programme, Mweso, DRC

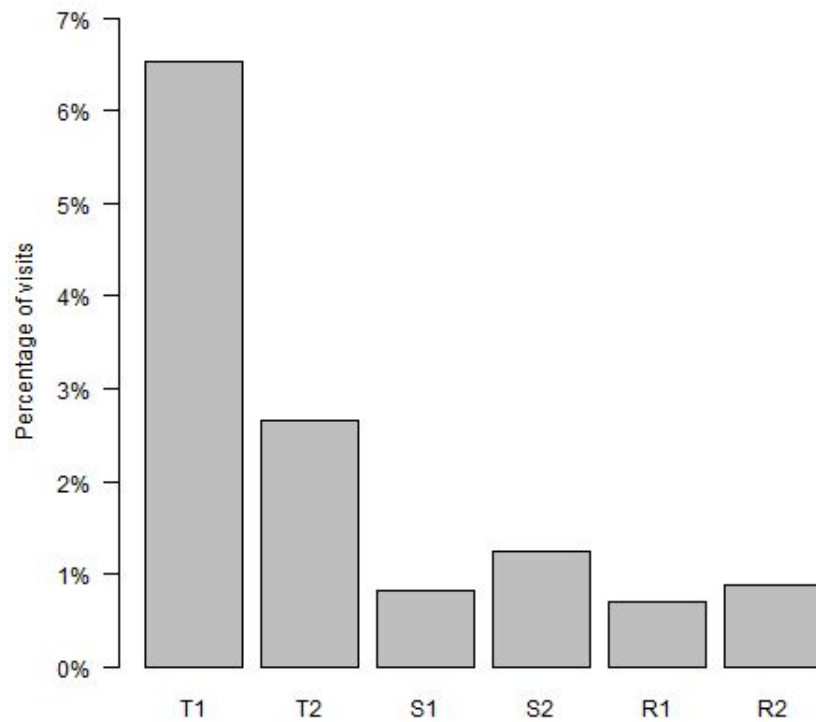

Note: Definitions of study periods T1 – R2 are described in Supplementary Data S1



## S2. Baseline characteristics of 243 patients on enrolment into Mwesio IDC-OPD service

| Variable               | Total | (%)     | DM-1 | (%)     | DM-2 | (%)     | Other/NA | (%)            |
|------------------------|-------|---------|------|---------|------|---------|----------|----------------|
| <b>Patients (N)</b>    | 243   |         | 62   |         | 125  |         | 56       |                |
| <b>Age</b>             |       |         |      |         |      |         |          |                |
| <18                    | 24    | (9.9%)  | 19   | (30.6%) | 0    | (0.0%)  | 5        | <b>(8.9%)</b>  |
| 18-40                  | 74    | (30.5%) | 39   | (62.9%) | 20   | (16.0%) | 15       | <b>(26.8%)</b> |
| 41-60                  | 112   | (46.1%) | 3    | (4.8%)  | 80   | (64.0%) | 29       | <b>(51.8%)</b> |
| >60                    | 33    | (13.6%) | 1    | (1.6%)  | 25   | (20.0%) | 7        | <b>(12.5%)</b> |
| <b>Sex</b>             |       |         |      |         |      |         |          |                |
| Male                   | 134   | (55.1%) | 34   | (54.8%) | 70   | (56.0%) | 30       | <b>(53.6%)</b> |
| Female                 | 108   | (44.4%) | 28   | (45.2%) | 55   | (44.0%) | 25       | <b>(44.6%)</b> |
| No data                | 1     | (0.4%)  | 0    | (0.0%)  | 0    | (0.0%)  | 1        | <b>(1.8%)</b>  |
| <b>Occupation</b>      |       |         |      |         |      |         |          |                |
| Labourer               | 121   | (49.8%) | 29   | (46.8%) | 85   | (68.0%) | 7        | <b>(12.5%)</b> |
| Office worker          | 19    | (7.8%)  | 2    | (3.2%)  | 11   | (8.8%)  | 6        | <b>(10.7%)</b> |
| Student                | 8     | (3.3%)  | 8    | (12.9%) | 0    | (0.0%)  | 0        | <b>(0.0%)</b>  |
| Unable to work         | 11    | (4.5%)  | 7    | (11.3%) | 3    | (2.4%)  | 1        | <b>(1.8%)</b>  |
| Other                  | 48    | (19.8%) | 15   | (24.2%) | 26   | (20.8%) | 7        | <b>(12.5%)</b> |
| No data                | 36    | (14.8%) | 1    | (1.6%)  | 0    | (0.0%)  | 35       | <b>(62.5%)</b> |
| <b>Medical History</b> |       |         |      |         |      |         |          |                |
| <b>CVD</b>             |       |         |      |         |      |         |          |                |
| Yes                    | 5     | (2.1%)  | 1    | (1.6%)  | 3    | (2.4%)  | 1        | <b>(1.8%)</b>  |
| No data                | 24    | (9.9%)  | 0    | (0.0%)  | 0    | (0.0%)  | 24       | <b>(42.9%)</b> |
| <b>Hypertension</b>    |       |         |      |         |      |         |          |                |
| Yes                    | 20    | (8.2%)  | 0    | (0.0%)  | 18   | (14.4%) | 2        | <b>(3.6%)</b>  |
| No data                | 25    | (10.3%) | 0    | (0.0%)  | 1    | (0.8%)  | 24       | <b>(42.9%)</b> |
| <b>Tuberculosis</b>    |       |         |      |         |      |         |          |                |
| Yes                    | 6     | (2.5%)  | 1    | (1.6%)  | 5    | (4.0%)  | 0        | <b>(0.0%)</b>  |
| No data                | 24    | (9.9%)  | 0    | (0.0%)  | 0    | (0.0%)  | 24       | <b>(42.9%)</b> |
| <b>Malnutrition</b>    |       |         |      |         |      |         |          |                |
| Yes                    | 19    | (7.8%)  | 15   | (24.2%) | 2    | (1.6%)  | 2        | <b>(3.6%)</b>  |
| No data                | 24    | (9.9%)  | 0    | (0.0%)  | 0    | (0.0%)  | 24       | <b>(42.9%)</b> |
| <b>Family Hx of DM</b> |       |         |      |         |      |         |          |                |
| Yes                    | 35    | (14.4%) | 6    | (9.7%)  | 23   | (18.4%) | 6        | <b>(10.7%)</b> |
| No data                | 24    | (9.9%)  | 0    | (0.0%)  | 0    | (0.0%)  | 24       | <b>(42.9%)</b> |

| <b>Patients &gt;=18 years(N)*</b> | 219        | 43         | 125        | 51         |
|-----------------------------------|------------|------------|------------|------------|
| <b>Smoking</b>                    |            |            |            |            |
| Yes                               | 18 (8.2%)  | 1 (2.3%)   | 16 (12.8%) | 1 (2.0%)   |
| No data                           | 21 (9.6%)  | 0 (0.0%)   | 0 (0.0%)   | 21 (41.2%) |
| <b>Alcohol</b>                    |            |            |            |            |
| Yes                               | 50 (22.8%) | 12 (27.9%) | 32 (25.6%) | 6 (11.8%)  |
| No data                           | 33 (15.1%) | 0 (0.0%)   | 1 (0.8%)   | 32 (62.7%) |
| <b>BMI</b>                        |            |            |            |            |
| <18.5                             | 68 (31.1%) | 23 (53.5%) | 34 (27.2%) | 11 (21.6%) |
| 18.5-24.9                         | 96 (43.8%) | 15 (34.9%) | 59 (47.2%) | 22 (43.1%) |
| 25.0-29.9                         | 41 (18.7%) | 5 (11.6%)  | 27 (21.6%) | 9 (17.6%)  |
| >=30                              | 7 (3.2%)   | 0 (0.0%)   | 5 (4.0%)   | 2 (3.9%)   |
| No data                           | 7 (3.2%)   | 0 (0.0%)   | 0 (0.0%)   | 7 (13.7%)  |

Note: For smoking, alcohol and BMI, denominators included only patients aged 18 years or above.

1  
2  
3  
4  
5  
6  
7  
8  
9  
10  
11  
12  
13  
14  
15  
16  
17  
18  
19  
20  
21  
22  
23  
24  
25  
26  
27  
28  
29  
30  
31  
32  
33  
34  
35  
36  
37  
38  
39  
40  
41  
42  
43  
44  
45  
46  
47  
48  
49  
50  
51  
52  
53  
54  
55  
56  
57  
58  
59  
60

For peer review only

1  
2  
3  
4  
5  
6  
7  
8  
9  
10  
11  
12  
13  
14  
15  
16  
17  
18  
19  
20  
21  
22  
23  
24  
25  
26  
27  
28  
29  
30  
31  
32  
33  
34  
35  
36  
37  
38  
39  
40  
41  
42  
43  
44  
45  
46  
47  
48  
49  
50  
51  
52  
53  
54  
55  
56  
57  
58  
59  
60

For peer review only

## SM3. Monthly resource use associated with IDC-OPD in Mweso Hospital, North Kivu,

## DRC

| Items                                                        | Unit   | 2014   | 2015   |
|--------------------------------------------------------------|--------|--------|--------|
| <b>Medicine</b>                                              |        |        |        |
| INSULIN ISOPHANE (NPH), human, 100 UI/ml, 10 ml, vial        | 6.300  | 40     | 40     |
| INSULIN RAPID, human, 100 IU/ml, 10 ml, vial                 | 6.300  | 8      | 8      |
| INSULIN, 100IU/ml, BIPHASIC 30, human, 10ml, vial            | 13.610 | 10     | 10     |
| METFORMIN hydrochloride, 500 mg, tab.                        | 0.014  | 5,300  | 12,000 |
| GLIBENCLAMIDE, 5 mg, tab.                                    | 0.005  | 750    | 3,600  |
| HYDROCHLOROTHIAZIDE, 50 mg, tab.                             | 0.003  | 0      | 300    |
| GLUCOSE HYPERTONIC, 50%, 50 ml, vial                         | 0.556  | 75     | 6      |
| AMITRIPTYLINE hydrochloride, 25 mg, tab.                     | 0.006  | 200    | 750    |
| ACETYLSALICYLIC acid (aspirin), 75 mg, tab.                  | 0.005  | 0      | 2,000  |
| AMLODIPINE 5mg, tabs.                                        | 0.018  | 0      | 300    |
| <b>Supplies</b>                                              |        |        |        |
| GLUCOMETER, blood glucose monitor (Nova StatStrip) + strips  | 96.705 | 5      | 10     |
| (glucometer Nova StatStrip) STRIP ref. 42214                 | 0.230  | 2,000  | 4,000  |
| SYRINGE, s.u., Luer, insulin, 100 IU/1 ml + fixed needle     | 0.079  | 2,000  | 4,000  |
| (spectrophotometer) KIT, DOSAGE CREATININE, Liquicolor 200ml | 4.830  | 3.5    | 3.5    |
| THERMOMETER, ELECTRONIC, accuracy 0.1 $\pm$ C + case         | 1.110  | 20     | 3      |
| SPHYGMOMANOMETER, one-hand manometer, Velcro, adult          | 26.000 | 0      | 1      |
| TEST, URINE, pH,dens,prot,gluc,ket,blood,nit,leuc, 1 strip   | 0.197  | 100    | 200    |
| REUSABLE SHARPS CONTAINER (RSC), 1.2 litre                   | 44.750 | 1      | 1      |
| CONTAINER, SAMPLE, plast., 60ml, non sterile, urine          | 0.083  | 1,700  | 200    |
| LANCET, s.u., sterile, standard point                        | 0.006  | 900    | 4,000  |
| GLOVE, EXAMINATION, latex, s.u. non sterile, medium          | 0.025  | 50,000 | 500    |
| <b>Staff time (days allocated to diabetes care)*</b>         |        |        |        |
| MSF Medical doctor                                           | 1,350  | 1      | 1      |
| MSF Nurse                                                    | 900    | 1      | 1      |
| BCZ Nurse                                                    | 239    | 1      | 1      |
| MSF psychosocial worker                                      | 1,422  | 0.125  | 0.125  |
| 1 Nutritionist (MSF)                                         | 864    | 0.0625 | 0.0625 |

\*Note: Staff time costs assumed 22 full-time working days per month.

SM4. Average days' delay in attendance since planned appointment per month of

IDC-OPD service, Mweso, DRC

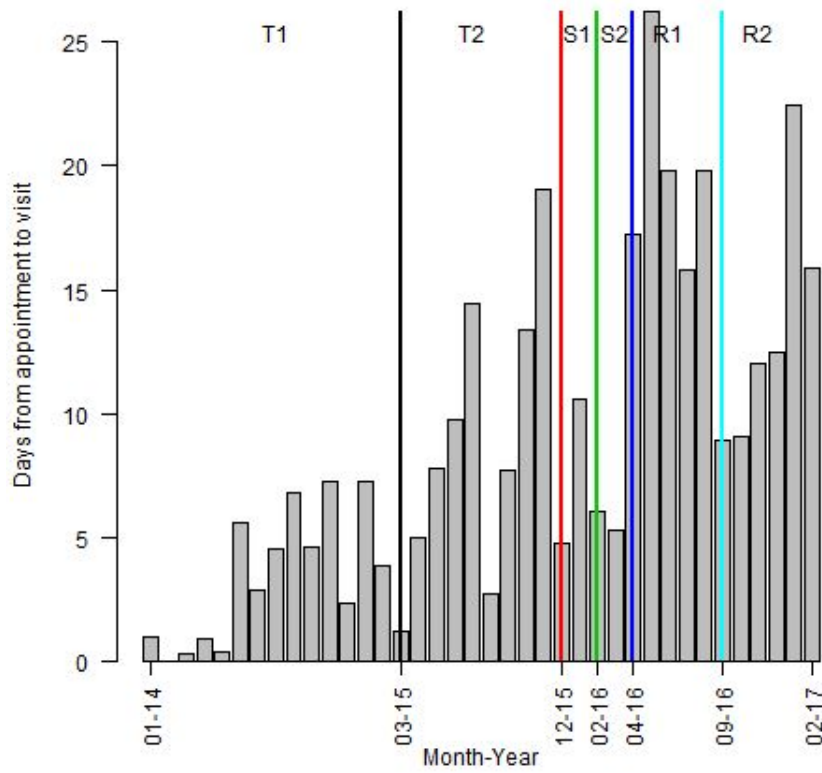

Review only

SM5. Proportion of visits at target for BP and glycaemic control, stratified by insulin prescription per month of IDC-OPD service, Mweso, DRC

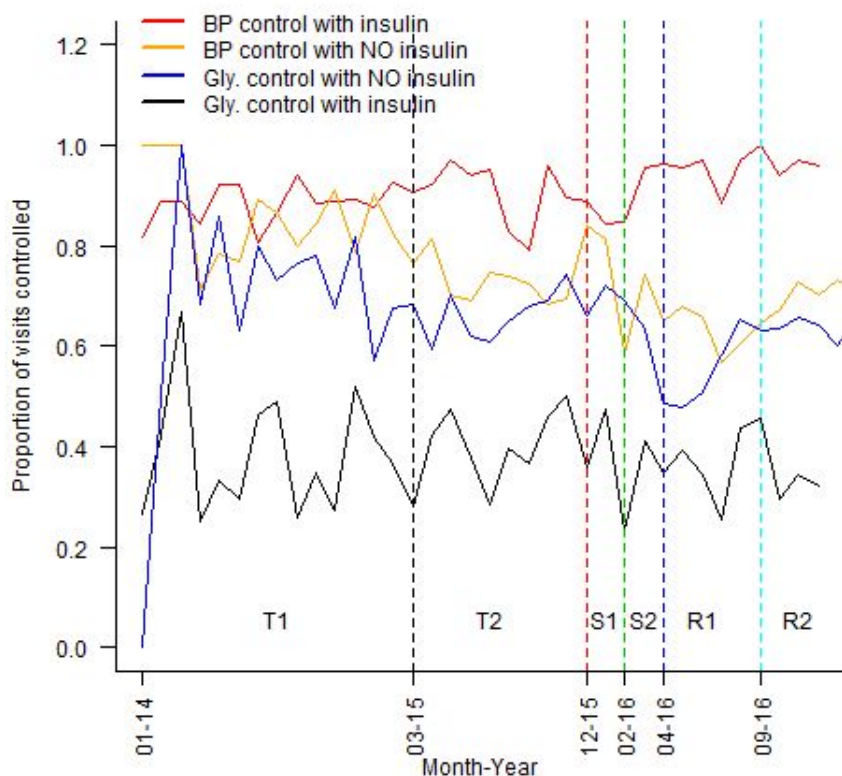

Note: Patients were categorised by whether they were prescribed insulin [+/- oral hypoglycaemic (OHG) drugs] or OHG drugs alone at their last recorded visit. The former group would have included Type 1 diabetics, Type 2 diabetics with more advanced illness requiring a combination of OHG and insulin, and those with an intermediate type of diabetes, presenting with high insulin requirements in the absence of diabetic ketoacidosis, which we postulated represented "malnutrition-related diabetes". The latter group were likely to include Type 2 diabetics.

SM6. Impact (OR) on BP and glycaemic control of study period over previous period, unstratified (A) and stratified by insulin prescription (B and C) per month of IDC-OPD service, Mweso, DRC

A. Impact (OR) on BP and glycaemia in all patients (not stratified by insulin prescription)

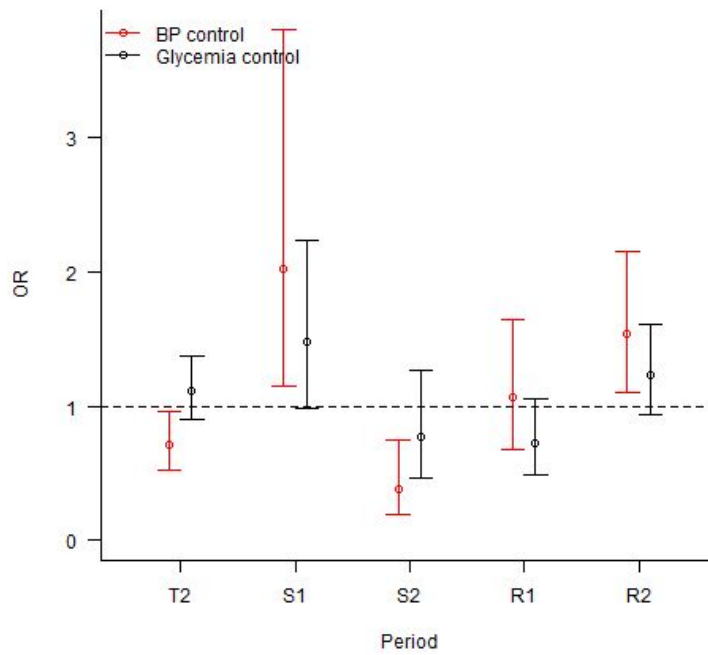

B. Impact (OR) on BP and glycaemia in patients on oral hypoglycaemic drugs only



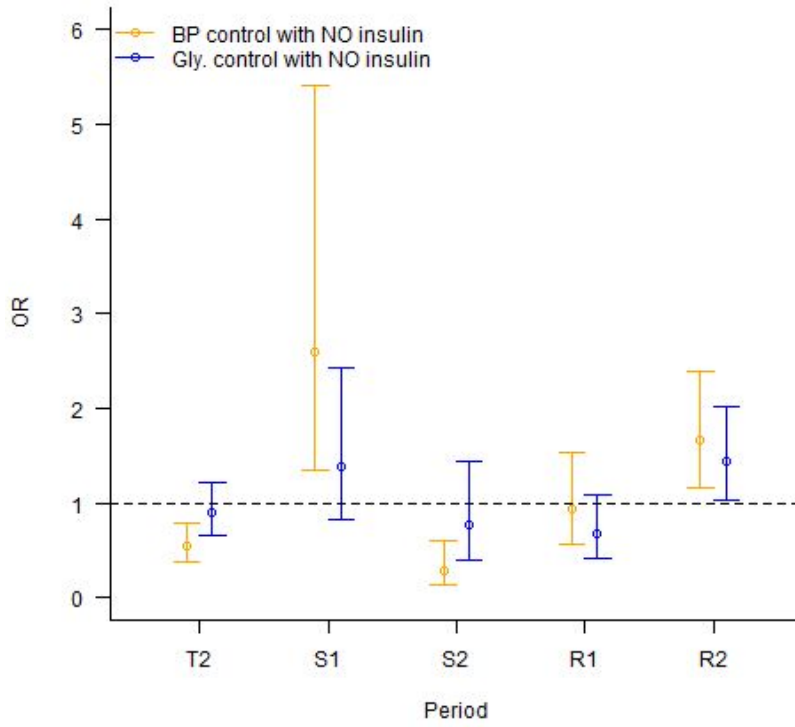

C. Impact (OR) on BP and glycaemia in patients prescribed insulin (+/- OHG)

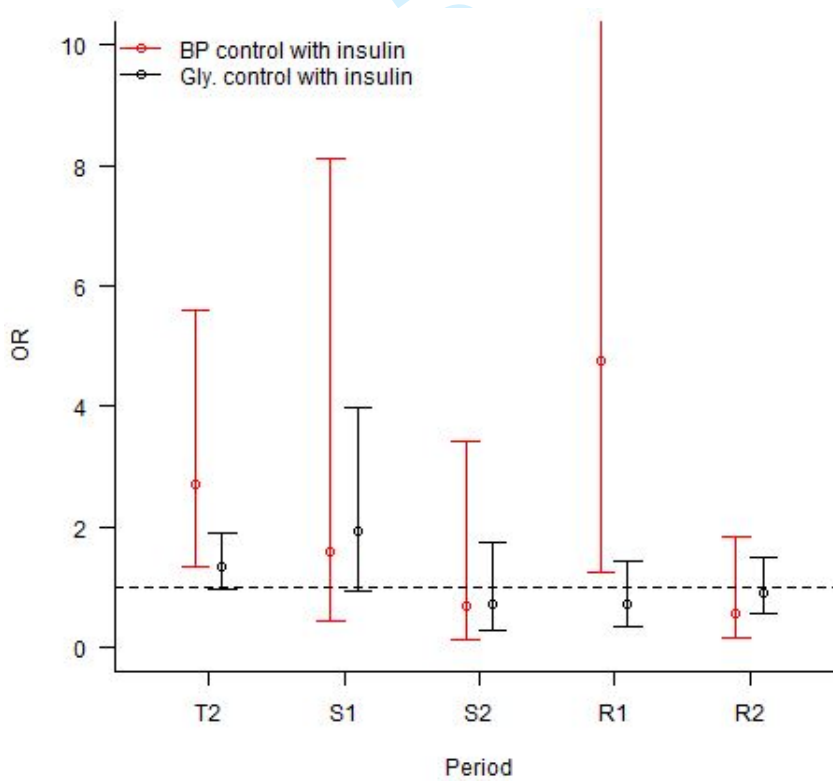

STROBE Statement—Checklist of items that should be included in reports of *cross-sectional studies*

**Study Title: Management of diabetes and associated costs in a complex humanitarian setting in the Democratic Republic of Congo.**

|                           | Item No | Recommendation                                                                                                                                                                                    | Page No      |
|---------------------------|---------|---------------------------------------------------------------------------------------------------------------------------------------------------------------------------------------------------|--------------|
| <b>Title and abstract</b> | 1       | (a) Indicate the study's design with a commonly used term in the title or the abstract                                                                                                            |              |
|                           |         | (b) Provide in the abstract an informative and balanced summary of what was done and what was found                                                                                               | 2            |
| <b>Introduction</b>       |         |                                                                                                                                                                                                   |              |
| Background/rationale      | 2       | Explain the scientific background and rationale for the investigation being reported                                                                                                              | 4            |
| Objectives                | 3       | State specific objectives, including any prespecified hypotheses                                                                                                                                  | 5,6          |
| <b>Methods</b>            |         |                                                                                                                                                                                                   |              |
| Study design              | 4       | Present key elements of study design early in the paper                                                                                                                                           | 5,7,8        |
| Setting                   | 5       | Describe the setting, locations, and relevant dates, including periods of recruitment, exposure, follow-up, and data collection                                                                   | 4-7          |
| Participants              | 6       | (a) Give the eligibility criteria, and the sources and methods of selection of participants                                                                                                       | 5,7,8        |
| Variables                 | 7       | Clearly define all outcomes, exposures, predictors, potential confounders, and effect modifiers. Give diagnostic criteria, if applicable                                                          | 7            |
| Data sources/measurement  | 8*      | For each variable of interest, give sources of data and details of methods of assessment (measurement). Describe comparability of assessment methods if there is more than one group              | 7,9          |
| Bias                      | 9       | Describe any efforts to address potential sources of bias                                                                                                                                         | 8            |
| Study size                | 10      | Explain how the study size was arrived at                                                                                                                                                         | 6            |
| Quantitative variables    | 11      | Explain how quantitative variables were handled in the analyses. If applicable, describe which groupings were chosen and why                                                                      | 8, 9         |
| Statistical methods       | 12      | (a) Describe all statistical methods, including those used to control for confounding                                                                                                             | 8            |
|                           |         | (b) Describe any methods used to examine subgroups and interactions                                                                                                                               | n/a          |
|                           |         | (c) Explain how missing data were addressed                                                                                                                                                       | 9; Supp Mat1 |
|                           |         | (d) If applicable, describe analytical methods taking account of sampling strategy                                                                                                                | 8            |
|                           |         | (e) Describe any sensitivity analyses                                                                                                                                                             | n/a          |
| <b>Results</b>            |         |                                                                                                                                                                                                   |              |
| Participants              | 13*     | (a) Report numbers of individuals at each stage of study—eg numbers potentially eligible, examined for eligibility, confirmed eligible, included in the study, completing follow-up, and analysed | 10           |
|                           |         | (b) Give reasons for non-participation at each stage                                                                                                                                              | n/a          |
|                           |         | (c) Consider use of a flow diagram                                                                                                                                                                | n/a          |
| Descriptive data          | 14*     | (a) Give characteristics of study participants (eg demographic, clinical, social) and information on exposures and potential confounders                                                          | Supp Mat 2   |
|                           |         | (b) Indicate number of participants with missing data for each variable of interest                                                                                                               | Supp Mat 1   |

|                          |     |                                                                                                                                                                                                              |            |
|--------------------------|-----|--------------------------------------------------------------------------------------------------------------------------------------------------------------------------------------------------------------|------------|
| Outcome data             | 15* | Report numbers of outcome events or summary measures                                                                                                                                                         | n/a        |
| Main results             | 16  | (a) Give unadjusted estimates and, if applicable, confounder-adjusted estimates and their precision (eg, 95% confidence interval). Make clear which confounders were adjusted for and why they were included | 8          |
|                          |     | (b) Report category boundaries when continuous variables were categorized                                                                                                                                    | Supp Mat 2 |
|                          |     | (c) If relevant, consider translating estimates of relative risk into absolute risk for a meaningful time period                                                                                             | n/a        |
| Other analyses           | 17  | Report other analyses done—eg analyses of subgroups and interactions, and sensitivity analyses                                                                                                               | n/a        |
| <b>Discussion</b>        |     |                                                                                                                                                                                                              |            |
| Key results              | 18  | Summarise key results with reference to study objectives                                                                                                                                                     | 10-12      |
| Limitations              | 19  | Discuss limitations of the study, taking into account sources of potential bias or imprecision. Discuss both direction and magnitude of any potential bias                                                   | 14         |
| Interpretation           | 20  | Give a cautious overall interpretation of results considering objectives, limitations, multiplicity of analyses, results from similar studies, and other relevant evidence                                   | 12-14      |
| Generalisability         | 21  | Discuss the generalisability (external validity) of the study results                                                                                                                                        | 14         |
| <b>Other information</b> |     |                                                                                                                                                                                                              |            |
| Funding                  | 22  | Give the source of funding and the role of the funders for the present study and, if applicable, for the original study on which the present article is based                                                | 16         |

\*Give information separately for exposed and unexposed groups.

**Note:** An Explanation and Elaboration article discusses each checklist item and gives methodological background and published examples of transparent reporting. The STROBE checklist is best used in conjunction with this article (freely available on the Web sites of PLoS Medicine at <http://www.plosmedicine.org/>, Annals of Internal Medicine at <http://www.annals.org/>, and Epidemiology at <http://www.epidem.com/>). Information on the STROBE Initiative is available at [www.strobe-statement.org](http://www.strobe-statement.org).

# BMJ Open

## Management of diabetes and associated costs in a complex humanitarian setting in the Democratic Republic of Congo: a retrospective cohort study

|                                 |                                                                                                                                                                                                                                                                                                                                                                                                                                                                                                                                                                                                                                                                                                                                                                                                                                                                                                                                                                                                                                      |
|---------------------------------|--------------------------------------------------------------------------------------------------------------------------------------------------------------------------------------------------------------------------------------------------------------------------------------------------------------------------------------------------------------------------------------------------------------------------------------------------------------------------------------------------------------------------------------------------------------------------------------------------------------------------------------------------------------------------------------------------------------------------------------------------------------------------------------------------------------------------------------------------------------------------------------------------------------------------------------------------------------------------------------------------------------------------------------|
| Journal:                        | <i>BMJ Open</i>                                                                                                                                                                                                                                                                                                                                                                                                                                                                                                                                                                                                                                                                                                                                                                                                                                                                                                                                                                                                                      |
| Manuscript ID                   | bmjopen-2019-030176.R1                                                                                                                                                                                                                                                                                                                                                                                                                                                                                                                                                                                                                                                                                                                                                                                                                                                                                                                                                                                                               |
| Article Type:                   | Original research                                                                                                                                                                                                                                                                                                                                                                                                                                                                                                                                                                                                                                                                                                                                                                                                                                                                                                                                                                                                                    |
| Date Submitted by the Author:   | 21-Aug-2019                                                                                                                                                                                                                                                                                                                                                                                                                                                                                                                                                                                                                                                                                                                                                                                                                                                                                                                                                                                                                          |
| Complete List of Authors:       | <p>Ansbro, Éimhín; Médecins sans Frontières, Manson Unit; London School of Hygiene and Tropical Medicine Faculty of Epidemiology and Population Health, Centre for Global Chronic Conditions</p> <p>Biringanine, Michel; Medecins Sans Frontieres Operational Centre Amsterdam, Mweso Hospital</p> <p>Caleo, Grazia; Médecins sans Frontières, Manson Unit</p> <p>Prieto-Merino, David; London School of Hygiene and Tropical Medicine Faculty of Epidemiology and Population Health, Epidemiology of NCDs</p> <p>Sadique, Zia; London School of Hygiene and Tropical Medicine Faculty of Public Health and Policy, Health Services Research and Policy</p> <p>Perel, Pablo; London School of Hygiene and Tropical Medicine Faculty of Epidemiology and Population Health, Centre for Global Chronic Conditions</p> <p>Jobanputra, Kiran; Médecins sans Frontières, Manson Unit</p> <p>Roberts, Bayard; London School of Hygiene and Tropical Medicine Faculty of Public Health and Policy, Centre for Global Chronic Conditions</p> |
| <b>Primary Subject Heading</b>: | Global health                                                                                                                                                                                                                                                                                                                                                                                                                                                                                                                                                                                                                                                                                                                                                                                                                                                                                                                                                                                                                        |
| Secondary Subject Heading:      | Diabetes and endocrinology, Epidemiology                                                                                                                                                                                                                                                                                                                                                                                                                                                                                                                                                                                                                                                                                                                                                                                                                                                                                                                                                                                             |
| Keywords:                       | Health economics < HEALTH SERVICES ADMINISTRATION & MANAGEMENT, DIABETES & ENDOCRINOLOGY, International health services < HEALTH SERVICES ADMINISTRATION & MANAGEMENT, Epidemiology < TROPICAL MEDICINE, General diabetes < DIABETES & ENDOCRINOLOGY                                                                                                                                                                                                                                                                                                                                                                                                                                                                                                                                                                                                                                                                                                                                                                                 |
|                                 |                                                                                                                                                                                                                                                                                                                                                                                                                                                                                                                                                                                                                                                                                                                                                                                                                                                                                                                                                                                                                                      |

SCHOLARONE™  
Manuscripts

1  
2  
3 1 **Title: Management of diabetes and associated costs in a complex humanitarian setting in the**  
4  
5 2 **Democratic Republic of Congo: a retrospective cohort study.**  
6  
7

8  
9 3 **Corresponding Author:**

10 4 Éimhín Ansbro,

11 5 Formerly: Manson Unit, Médecins sans Frontières, London, United Kingdom

12 6 Currently: London School of Hygiene & Tropical Medicine, Keppel Street, London WC1E 7HT, UK

13 7 Email: [eimhin.ansbro@lshtm.ac.uk](mailto:eimhin.ansbro@lshtm.ac.uk) Tel: +44(0) 207 927 2086

14 8 **Authors:**

- 15  
16 9 1. Éimhín Ansbro, Manson Unit, Médecins sans Frontières, London, United Kingdom; London  
17 10 School of Hygiene & Tropical Medicine, United Kingdom.  
18 11 2. Michel Biringanine, Médecins sans Frontières Operational Centre Amsterdam, Mweso  
19 12 Hospital, North Kivu, Democratic Republic of Congo  
20 13 3. Grazia Caleo, Manson Unit, Médecins sans Frontières, London, United Kingdom  
21 14 4. David Prieto-Merino, Department of Noncommunicable Disease Epidemiology, London  
22 15 School of Hygiene and Tropical Medicine, London, United Kingdom  
23 16 5. Zia Sadique, Department of Health Services Research and Policy, London School of Hygiene  
24 17 and Tropical Medicine, London, United Kingdom  
25 18 6. Pablo Perel, Centre for Global Chronic Conditions, London School of Hygiene and Tropical  
26 19 Medicine, London, United Kingdom  
27 20 7. Kiran Jobanputra, Manson Unit, Médecins sans Frontières, London, United Kingdom  
28 21 8. Bayard Roberts, Centre for Global Chronic Conditions, London School of Hygiene and  
29 22 Tropical Medicine, London, United Kingdom (Bayard.Roberts@lshtm.ac.uk)

30  
31  
32  
33  
34  
35  
36  
37  
38  
39  
40  
41  
42  
43  
44  
45  
46  
47  
48  
49 24 **Word Count: 4000**

50  
51  
52 26 **Keywords:** Democratic Republic of Congo, Sub-Saharan Africa, diabetes, hypertension,  
53 27 noncommunicable disease, humanitarian, conflict, care model, management, programme, chronic  
54 28 care, outpatient, hospital care, task shifting, cost, economic.  
55  
56  
57  
58  
59  
60

## 30 Abstract

31 **Objective:** We aimed to evaluate an Integrated Diabetic Clinic within a Hospital Outpatient  
32 Department (IDC-OPD) in a complex humanitarian setting in North Kivu, Democratic Republic of  
33 Congo. Specific objectives were to: (i) analyse diabetes intermediate clinical and programmatic  
34 outcomes (blood pressure/glycaemic control, visit volume and frequency); (ii) explore the  
35 association of key insecurity and related programmatic events with these outcomes; and (iii)  
36 describe incremental IDC OPD programme costs.

37 **Design:** Retrospective cohort analysis of routine programmatic data collected from January 2014 -  
38 February 2017; analysis of programme costs for 2014/2015.

39 **Setting:** Outpatient diabetes programme in Mweso hospital, supported by Médecins sans Frontières,  
40 in North Kivu, Demographic Republic of Congo.

41 **Participants:** Diabetes patients attending IDC-OPD.

42 **Outcome measures:** Intermediate clinical and programmatic outcome trends (blood pressure/  
43 glycaemic control; visit volume/frequency); incremental programme costs.

44 **Results:** Of 243 diabetes patients, 44.6% were women, median age was 45 (IQR 32-56); 51.4% were  
45 classified Type 2. On introduction of IDC-OPD, glucose control improved and patient volume and visit  
46 interval increased. During insecurity, control rates were initially maintained by a nurse-provided,  
47 scaled-back service, while patient volume and visit interval decreased. Following service suspension  
48 due to drug stock-outs, patients were less likely to achieve control,, improving on service  
49 resumption. Total costs decreased 20% from 2014 (€32,121) to 2015 (€26,410). Annual cost per  
50 patient dropped from €417 in 2014 to €183 in 2015 due to reduced supply costs and increased  
51 patient numbers.

1  
2  
3 52 **Conclusions:** In a chronic conflict setting, we documented that control of diabetes intermediate  
4  
5 53 outcomes was achievable during stable periods. During insecure periods, a simplified, nurse-led  
6  
7 54 model maintained control rates until drug stock-outs occurred. Incremental per patient annual costs  
8  
9 55 were lower than chronic HIV care costs in low-income settings. Future operational research should  
10  
11 56 define a simplified diabetes care package including emergency preparedness.  
12  
13  
14  
15 57  
16  
17

## 18 58 **Strengths and Limitations**

- 19  
20 59 • This is the first study of its kind to examine diabetes intermediate clinical outcomes and  
21  
22 60 programme costs in a complex humanitarian setting in sub-Saharan Africa.
- 23  
24 61 • Using routine clinical and programmatic data collected in a protracted conflict setting, we  
25  
26 62 estimated the effect of insecurity and related programmatic changes on diabetes  
27  
28 63 intermediate clinical outcomes, which to our knowledge, has not been addressed in the  
29  
30 64 literature to date.
- 31  
32 65 • The study was limited by the relatively small sample size and lack of control group for  
33  
34 66 comparison.
- 35  
36 67 • The costing analysis was descriptive and based on aggregate data and so neither the cost-  
37  
38 68 effectiveness of the programme nor patient-level costs could be determined.  
39  
40  
41  
42  
43  
44  
45  
46  
47  
48  
49  
50  
51  
52  
53  
54  
55  
56  
57  
58  
59  
60

1  
2  
3  
4 70 **Title: Management of diabetes and associated costs in a complex**  
5  
6 71 **humanitarian setting in the Democratic Republic of Congo: a retrospective**  
7  
8  
9 72 **cohort study.**  
10  
11  
12  
13 73  
14  
15  
16 74 **Background**  
17  
18  
19  
20  
21 75 Over the past 40 years, diabetes prevalence has increased sharply worldwide, particularly in low and  
22  
23 76 middle income countries (LMICs).[1] However, data on the burden and needs related to diabetes  
24  
25 77 and other non-communicable diseases (NCDs) are scarce from conflict-affected countries,  
26  
27 78 particularly those in Sub-Saharan Africa.[1,2] Humanitarian actors have been slow to prioritise  
28  
29 79 diabetes treatment in disaster and post-conflict settings despite reporting increasing presentations  
30  
31 80 of diabetic patients within their programmes.[3–6] This is due to lack of knowledge on local diabetes  
32  
33 81 epidemiology, limited research on diabetes management or outcomes in crisis settings; a lack of  
34  
35 82 programmatic and policy guidance or tools to support diabetes care in such settings; prioritisation of  
36  
37 83 other health needs; and also a perception that diabetes care is complex and expensive. [2,3,6–8]  
38  
39  
40  
41 84 The humanitarian situation in Democratic Republic of Congo (DRC) is considered one of the most  
42  
43 85 complex and challenging worldwide. Prolonged conflict over two decades has resulted in over 5  
44  
45 86 million deaths, over 4.5 million internally displaced people, the exodus of over 800,000 refugees,  
46  
47 87 and ongoing political and social instability. [9,10] The health system, weakened by prolonged  
48  
49 88 conflict, is challenged by competing health needs in a country ranked 176 of 189 on the human  
50  
51 89 development index despite holding rich natural resources. [11]  
52  
53  
54  
55 90 On this backdrop, diabetes prevalence is increasing, currently estimated at 4.0 - 5.4%. [12–14] While  
56  
57 91 some factors implicated in the global rise in diabetes prevalence hold true in DRC (demographic  
58  
59 92 change, urbanisation, changing diets etc.) chronic conflict and political instability add additional  
60



1  
2  
3 93 complexity. Recent reviews and ethnographic evidence point to a link between chronic food  
4  
5 94 insecurity, childhood malnutrition and diabetes. [13,15,16] In DRC, 43% of children under 5 years are  
6  
7 95 chronically malnourished and levels of food insecurity have risen sharply, with millions subsisting on  
8  
9  
10 96 World Food Programme rations. [17] Recent evidence also supports an association between chronic  
11  
12 97 perceived stress and diabetes onset, while patients with diabetes in humanitarian settings focus on  
13  
14 98 suffering and loss as a cause of their illness. [16,18] Furthermore, in humanitarian crises, people with  
15  
16 99 diabetes are at increased risk of complications and death due to treatment interruption and  
17  
18  
19 100 precarious access to food and water. [2,6]  
20  
21  
22 101 Médecins sans Frontières (MSF), a medical humanitarian organisation, has supported healthcare  
23  
24 102 delivery in Mweso, North Kivu, in collaboration with the Ministry of Health since 2008. North Kivu is  
25  
26 103 a rural, impoverished area bordering Rwanda with an estimated population of 365,000. It remains a  
27  
28 104 flash point in the on-going conflict between shifting rebel groups and government forces, which has  
29  
30 105 been characterised by brutal violence against civilians and destruction of lives and livelihoods.  
31  
32  
33 106 Outbreaks of violence since 2016 have resulted in recurrent waves of population displacement;  
34  
35 107 North Kivu alone hosts 17 internally displaced person camps. MSF supports health services in 4 out  
36  
37 108 of 23 Primary Health Care clinics and in Mweso hospital within Masisi District. Mweso hospital  
38  
39 109 serves a catchment area of approximately 145,000 people, with about 65,000 recipients of care  
40  
41 110 living in the immediate vicinity of the hospital.  
42  
43  
44  
45 111 While a national diabetes programme exists in DRC, available diabetes care is concentrated at  
46  
47 112 hospital level in major cities. [19] In response to growing patient and provider needs in Mweso, MSF  
48  
49 113 implemented a hospital-outpatient based diabetes programme in March 2015, the Integrated  
50  
51 114 Diabetic Clinic within Hospital Outpatient Department (IDC-OPD) in place of the ad hoc care  
52  
53 115 previously undertaken. The IDC-OPD was integrated at the clinical level into usual outpatient  
54  
55 116 activities, with pre-existing staff trained to provide this additional service. [20] The programme  
56  
57  
58 117 comprised a nurse-led, multi-disciplinary model, using locally adapted clinical guidelines, patient  
59  
60

1  
2  
3 118 counselling materials and data collection tools, accompanied by three days of specialist training.[21]  
4

5 119 The clinic team included: a nurse supervisor, nursing assistant, two doctors, a nutritionist, and  
6  
7 120 education and psychosocial support officers. Diabetes was diagnosed according to World Health  
8  
9 121 Organization (WHO) guidelines using repeated fasting capillary glucose. Most patients were  
10  
11 122 identified as diabetic and enrolled after acute hospital presentation, while some were identified via  
12  
13 123 the Mweso outpatient department or referring primary care clinics.  
14  
15

16  
17 124 Patients received a detailed enrolment assessment, monthly nurse-led follow-up and 6-monthly  
18  
19 125 medical review. The program included context-adapted dietary advice (accounting for locally  
20  
21 126 available and affordable foods and customs) and psychosocial support, including clinician-moderated  
22  
23 127 peer support groups and involvement of family or friends as treatment supporters. The psychosocial  
24  
25 128 aspects of patients and providers managing diabetes are discussed in a related paper, with major  
26  
27 129 themes from the patient perspective including the difficulty adhering to the recommended diet and  
28  
29 130 barriers to clinic access during outbreaks of violence. [22] Each patient was given a clinic-held  
30  
31 131 patient file and patient-held passport to facilitate safe passage when armed groups impeded their  
32  
33 132 travel. Clinical guidelines were adapted from MSF, WHO and other international guidance. [23]  
34  
35 133 Patient educational tools (disease and diet education leaflets) were adapted from Santé Diabète  
36  
37 134 [24], a Malian Non-Governmental Organisation, and generic medications, included on MSF's  
38  
39 135 Essential Drugs List, were prescribed. Insulin doses were adjusted using single fasting capillary blood  
40  
41 136 glucose readings and patients' reported symptoms of hypo- or hyperglycaemia in the absence of  
42  
43 137 home glucose monitoring. Insulin-dependent patients were prescribed human insulin, delivered via  
44  
45 138 needle and syringe, and advised to store this at home in a clay pot (refrigeration was unavailable),  
46  
47 139 recommended as a safe alternative in similar contexts. [25]  
48  
49  
50  
51  
52  
53

54 140 In early 2016, outbreaks of armed violence restricted movement of patients and supplies. Direct  
55  
56 141 attacks on MSF staff and facilities, including an armed robbery and abductions, led to withdrawal of  
57  
58 142 the international staff from Mweso and temporary scaling back of the programme, with local nursing  
59  
60

1  
2  
3 143 staff dispensing medications to any patients reaching the clinic. Later, the programme was  
4  
5 144 suspended for a period of six weeks when supply routes were entirely blocked and drug supplies  
6  
7 145 were exhausted.  
8  
9  
10 146 A mixed methods evaluation of the Mweso IDC-OPD programme was undertaken by MSF and  
11  
12  
13 147 included a qualitative evaluation exploring patient and provider clinical and psychosocial challenges,  
14  
15 148 presented elsewhere [22]; and a retrospective review of quantitative programmatic data and cost  
16  
17 149 data collected as part of routine care in a chronic conflict zone, reported here. The overall objective  
18  
19 150 of this paper is to evaluate an Integrated Diabetic Clinic within a Hospital Outpatient Department  
20  
21 151 (IDC-OPD) in a complex humanitarian setting in North Kivu in Democratic Republic of Congo. The  
22  
23 152 specific objectives are to: (i) analyse diabetes intermediate clinical and programmatic outcomes  
24  
25 153 (blood pressure/glycaemic control, visit frequency and volume); (ii) explore the association of key  
26  
27 154 insecurity and related programmatic events with these outcomes; and (iii) describe incremental IDC  
28  
29 155 OPD programme costs.  
30  
31  
32  
33

## 34 156 **Methods**

35  
36 157 It has been acknowledged that traditional experimental and evaluation methods may be unfeasible,  
37  
38 158 inappropriate or even unethical to apply in humanitarian settings [26]. Therefore, we have used a  
39  
40 159 pragmatic approach to utilising programmatic data, with an open cohort design. For the outcome  
41  
42 160 analysis, we conducted a retrospective analysis of routine data of enrolled adults aged  $\geq 18$  years  
43  
44 161 from January 2014 to February 2017, examining trends in diabetes outcomes and their association  
45  
46 162 with key programmatic events. The study period was divided into five phases, defined by  
47  
48 163 programmatic changes or periods of heightened insecurity (which impacted service delivery due to  
49  
50 164 staff evacuation, supply chain interruption and reduced patient access). Period T1 refers to ad-hoc  
51  
52 165 care delivered before introduction of the IDC-OPD programme (T2). Security incidents in December  
53  
54 166 2015 prompted a period of service suspension (nurse-only care, with drug pick-ups, glucose testing  
55  
56  
57  
58  
59  
60

1  
2  
3 167 and minimal treatment adjustments) (S1). Complete suspension followed once drug stocks were  
4  
5 168 exhausted (S2). Limited service resumed in April (R1) until full service recommenced from  
6  
7 169 September 2016 (R2) (Table 1).  
8  
9

10  
11 170 Table 1. Study Periods for Evaluation of IDC-OPD Programme, Mweso, DRC  
12

| Study Period           | Description                                                                                                             | Dates                      |
|------------------------|-------------------------------------------------------------------------------------------------------------------------|----------------------------|
| <b>Training 1 (T1)</b> | Ad hoc diabetes service following basic staff training                                                                  | 01/01/2014 –<br>14/03/2015 |
| <b>Training 2 (T2)</b> | IDC-OPD implemented following formal staff training                                                                     | 15/03/2015 –<br>14/12/2015 |
| <b>Suspend 1 (S1)</b>  | Nurse-provided care without medical supervision;<br>monthly drug refills provided until buffer stocks were<br>exhausted | 15/12/2015 –<br>31/01/2016 |
| <b>Suspend 2 (S2)</b>  | No clinical supervision or drugs were provided                                                                          | 01/02/2016 –<br>14/04/2016 |
| <b>Resume 1 (R1)</b>   | The service was resumed without medical<br>supervision or quality control                                               | 15/04/2016 –<br>31/08/2016 |
| <b>Resume 2 (R2)</b>   | Full service resumed until end of data collection<br>period                                                             | 01/09/2016 –<br>09/02/2017 |

171

172 **Data**

173 Patients were given a unique identification number on enrolment. Data were recorded in paper-  
174 based clinic-held files by clinical staff and transferred to an electronic database by a trained data  
175 entry operator on a weekly basis. Missing data were discussed with the nurse manager and gaps  
176 were filled during follow-up clinical visits. Single data entry was performed on a password-protected

1  
2  
3 177 Microsoft Excel software application specifically developed by MSF for this programme. Anonymised  
4  
5 178 exports were transferred to the study team on a monthly basis.  
6  
7  
8 179 Demographic data on patients' age, gender, occupation, and village of residence were recorded on  
9  
10 180 enrolment. Cardiovascular risk factors (smoking status, current alcohol use), family history of  
11  
12 181 diabetes, year of diabetes diagnosis and self-reported history of childhood malnutrition and/or  
13  
14 182 tuberculosis were recorded. Clinical parameters: body mass index (BMI), blood pressure (BP)  
15  
16 183 measured by manual sphygmomanometer according to local MSF protocols [21], fasting capillary  
17  
18 184 blood glucose (FBG); prescribed diabetes drugs [insulin and/or oral hypoglycaemic drugs (OHGs)];  
19  
20 185 and diabetes classification (Type I, Type II or other) were recorded at each clinical encounter.  
21  
22 186 Medical review at enrolment and six monthly thereafter was recorded, including biochemical  
23  
24 187 markers (serum creatinine) and examination for complications (visual acuity, cataract, proteinuria,  
25  
26 188 foot check). Numbers of deaths, transfers out of the area and delays in attendance were also  
27  
28 189 documented. The key intermediate clinical outcome and programme measures used in the analysis  
29  
30 190 are shown in Table 2.  
31  
32  
33  
34  
35  
36 191

37  
38  
39 192 Table 2: Outcome measures used to determine effect of different programme periods on  
40  
41 193 programme delivery and intermediate clinical outcomes  
42  
43

| Category                                  | Variable                                                                                                                                                                                 |
|-------------------------------------------|------------------------------------------------------------------------------------------------------------------------------------------------------------------------------------------|
| <b>Intermediate<br/>Clinical Outcomes</b> | Proportion of visits per month where patients' BP is at target (< 140/90 mmHg)<br><br>Proportion of visits per month where patients' blood glucose is at target (> 4.2 and ≤ 8.3 mmol/L) |
| <b>Number and<br/>frequency of visits</b> | Number of visits per month<br><br>Number of patients seen per month                                                                                                                      |

|  |                                           |
|--|-------------------------------------------|
|  | Average visits per patient per month      |
|  | Average days from previous visit          |
|  | Missing data for BP / glycaemia per visit |

194

195

## 196 Analysis

197 Basic demographics were analysed using mean and median and were presented with inter-quartile  
 198 ranges. We assessed the relationship of different study periods with the frequency of visits and the  
 199 impact of study periods on intermediate clinical outcomes i.e. per visit attainment of blood pressure  
 200 (< 140/90 mmHg) and glycaemic (> 4.2 and ≤ 8.3 mmol/L) targets.

201 To estimate the effect of a period change we calculated the odds ratio (OR) of the odds of having the  
 202 biomarker under control in a visit in the new period ( $t$ ) over the odds of having the biomarker  
 203 controlled in a visit in the previous period ( $t-1$ ):  $OR_t = Odds_t / Odds_{t-1}$ . If  $OR_t > 1$ , this meant that the  
 204 chances of the biomarker being under control in a visit in period  $t$  was greater than the chances of  
 205 the biomarker being under control in a visit in the previous period ( $t-1$ ) (but not necessarily than  
 206 other periods,  $t-2$ ,  $t-3$ , etc.). Likewise,  $OR_t < 1$  implied a reduction in the chances of having the  
 207 biomarker under control in a visit during period  $t$  compared to a visit during the previous period ( $t-$   
 208  $1$ ). To estimate these OR we ran a logistic model with period as a categorical variable, suitably  
 209 coded, and adjusted for sex, age (and square and cube terms) and number of visits of the patient  
 210 (and square term). The models were stratified by whether the patient was prescribed insulin (+/-  
 211 oral hypoglycaemic agents) at the previous visit.

212 Missing data: Our main analysis used only complete data; records with missing data were excluded.

213 Few outcome variable data were missing: less than 3% in BP control (most of it in the pre-training

1  
2  
3 214 period) and less than 0.3% for glycaemic control (Supplement SM1). There were no missing data for  
4  
5 215 date of visit, sex or age.  
6  
7

8 216  
9

## 10 217 **Costing data and analysis**

11  
12  
13 218 For the descriptive, incremental cost analysis we took a health services perspective. Information  
14  
15 219 related to the nature, location and mode of delivery of the NCD services was collected during a field  
16  
17 220 visit in December 2015 by the study team and was supplemented by informal interviews with clinical  
18  
19 221 and administrative staff. A data analysis tool was designed to collate the relevant financial costs for  
20  
21 222 the study period 2014 -2015 from routine programme documents and standard MSF tools including  
22  
23 223 budget, human resources, drug consumption monitoring, logistics/supply tools, clinic records and  
24  
25 224 programme reports. For salary costs, we included the incremental costs of an MSF-employed  
26  
27 225 medical doctor and nurse and an MOH-employed nurse (with salary supplement paid by MSF)  
28  
29 226 dedicating one day, two psychosocial workers dedicating one hour and a nutritionist dedicating 30  
30  
31 227 minutes per month to the IDC-OPD service (based on 22 working days per month). Hence, most  
32  
33 228 costs were related to drugs, equipment, disposables and stationary costs. Key cost items were  
34  
35 229 grouped into: (a) medicine, (b) supplies, and (c) staff time. Monthly resource use and unit cost data  
36  
37 230 were recorded and annualised (Supplement SM2); annual total cost, cost per visit and cost per  
38  
39 231 patient were reported in Euro (€) for 2014 before formal implementation of the IDC-OPD  
40  
41 232 programme and 2015 during full implementation.  
42  
43  
44  
45  
46

47 233 The study was approved by the Ministry of Health of North Kivu Province, DRC, and the Médecins  
48  
49 234 sans Frontières Ethics Review Board (ID 1542).  
50  
51

## 52 235 **Patient and Public Involvement**

53  
54  
55 236 Patients were not involved in the design or conduct of this study.  
56  
57

## 58 237 **Results**

1  
2  
3 238 Between January 1<sup>st</sup> 2014 and February 9<sup>th</sup> 2017, 243 patients were enrolled in the IDC-OPD  
4  
5 239 programme (Supplement SM3). Median age was 45 years (IQR 32 – 56); 44.6% of the cohort was  
6  
7 240 female. For adults  $\geq 18$  years (n=219), mean BMI was 21.3 kg/m<sup>2</sup> and 31.1% were underweight (BMI  
8  
9 241  $< 18.5$  kg/m<sup>2</sup>). On enrolment, 8.2% were current smokers; 24.4% reported recent alcohol intake;  
10  
11 242 self-reported medical history included: 9.1% hypertension, 2.2 % CVD, 2.7% tuberculosis (TB) and  
12  
13 243 8.7% malnutrition. Half were classified clinically as Type 2 diabetic (51%; n=125); 26% (n=62) as Type  
14  
15 244 1; and 23% (n=56) were either unclassified or classed as “other” (Supplement SM3).

### 19 245 **Trends in outcomes and impact of programmatic events**

20  
21  
22 246 Numbers of visits and appointment intervals increased after the introduction of the systematic  
23  
24 247 approach to diabetes care, which included monthly review appointments for stable patients (T2)  
25  
26 248 (Figure 1; Supplement SM4). During the period of scaled back service (S1), visit numbers initially  
27  
28 249 climbed while the visit interval decreased, which may reflect increased visit frequency due to short-  
29  
30 250 term drug supplies. Once drug buffer stock was exhausted, visit numbers dropped off sharply.  
31  
32 251 Patients may have avoided or were prevented from attending due to security conditions.  
33  
34  
35  
36  
37  
38  
39  
40  
41  
42  
43

44 252  
45  
46 253 Figure 1: Average number of days from previous visit per month for Mwesio IDC-OPD service  
47  
48  
49  
50  
51  
52  
53  
54  
55  
56  
57  
58  
59  
60

254  
255 BP control was consistently better than glycaemic control (of note, patients without diagnosed  
256 hypertension were included in the analysis) (Figure 2). By period T2, approximately 80% of visits  
257 achieved BP and 60% achieved glycaemic control. There was a notable drop in control of both  
258 parameters during programme suspension with a gradual improvement on resumption. Blood  
259 pressure control was consistently better, while glycaemic control was consistently worse, in patients  
260 prescribed insulin (+/- OHGs) compared with those prescribed OHGs alone (Supplement SM5), which



1  
2  
3 261 may be because the former group contained relatively young Type 1 and malnutrition-related  
4  
5 262 diabetics.  
6  
7

8 263  
9

10 264 Figure 2: Proportion of visits with BP or glycaemia at target by month, Mwesio IDC-OPD service  
11  
12

13 265  
14  
15

16 266 The results of the odds ratio (OR) calculations were unexpected. Odds of attaining BP control  
17  
18 267 appeared to worsen following implementation of the formal IDC-OPD programme (T2 vs. T1), while  
19  
20 268 odds of attaining glucose control improved, perhaps because care was initially focussed on glucose  
21  
22 269 control (Supplement SM6). On scaling back the service (S1), control of both parameters seemed to  
23  
24 270 improve, possibly because the service itself or the subset of patients reaching it during the insecure  
25  
26 271 period were somehow different. Once medications supplies were exhausted (S2), control of both  
27  
28 272 parameters seemed to worsen, but control was regained on service resumption. Stratifying by  
29  
30 273 insulin prescription showed similar results (Supplement SM5).  
31  
32

### 33 274 **Costs of providing diabetes care**

34  
35

36  
37 275 The total costs of diabetes care in 2014 and 2015 were approximately €32,000 and €26,000  
38  
39 276 respectively (Table 3). Supplies were the major driver of costs each year. The greatest costs in 2014  
40  
41 277 were for latex gloves, glucometers and glucometer strips; in 2015 they were for glucometers, strips  
42  
43 278 and lancets (Supplement SM3). While medication costs increased in 2015 relative to 2014, staff costs  
44  
45 279 remained unchanged, and total costs decreased, largely driven by reduced excess consumption of  
46  
47 280 latex gloves after it was identified during the IDP-OPD training sessions. The total number of patients  
48  
49 281 and number of visits increased significantly from 2014 to 2015, rising from 77 and 626 to 144 and  
50  
51 282 1033, respectively. Thus, cost per-patient per-year (PPPY) dropped from €417 to €183 and cost per-  
52  
53 283 visit was halved from €51 to €24. This was due to the combined effect of higher patient numbers,  
54  
55 284 greater total number of visits and lower supply costs in 2015 compared to 2014 (Supplement SM3).  
56  
57  
58  
59  
60

285

286 Table 3. Costs (€) of diabetes care in 2014 and 2015, Mweso IDC-OPD service

| Cost category            | 2014          | % 2014 costs | 2015          | % 2015 costs |
|--------------------------|---------------|--------------|---------------|--------------|
| <b>Medicine costs</b>    | 5,202         | 16%          | 7,746         | 29%          |
| <b>Supply costs</b>      | 25,435        | 79%          | 17,180        | 65%          |
| <b>Staff costs</b>       | 1,484         | 5%           | 1,484         | 6%           |
| <b>Total costs</b>       | <b>32,121</b> | 100%         | <b>26,410</b> | 100%         |
| <b>Costs per visit</b>   | <b>51</b>     |              | <b>24</b>     |              |
| <b>Costs per patient</b> | <b>417</b>    |              | <b>183</b>    |              |

287

288

289 **Discussion**

290 This evaluation of a chronic disease programme in a complex conflict setting, using routine  
 291 programmatic and cost data, provided lessons, which may improve clinical care and programme  
 292 design. To the best of our knowledge, the influence of treatment interruption and insecurity on  
 293 diabetes management in humanitarian settings has not been addressed in the literature. Similarly,  
 294 we are not aware of studies providing data on costs of diabetes care in crisis settings.

295 Our results show that glycaemic control was similar or better to that documented in other  
 296 humanitarian or low-income settings (although different targets were used) and, while it was  
 297 positively impacted by programmatic changes, control clearly deteriorated during periods of  
 298 heightened insecurity.[27] Our findings also indicate that, in a population previously undergoing

1  
2  
3 299 regular supervision, a simplified nurse-provided, algorithm-driven service with consistent medication  
4  
5 300 supply may be as effective as close medical supervision in maintaining disease control, particularly  
6  
7 301 during periods of service interruption. Medical input could thus be focused on achieving glycaemic  
8  
9 302 control in patients prescribed insulin, who appeared most affected by service interruption. We also  
10  
11  
12 303 note lack of evidence supporting the management of what we believed to be malnutrition-related  
13  
14 304 diabetes.

15  
16  
17 305 Intermittent outbreaks of armed conflict limited patient access and disrupted supply chains,  
18  
19 306 impeding continuity of care. We suggest, therefore, that in high-insecurity settings, chronic disease  
20  
21 307 programmes should focus on preparing patients, staff and supply chains to pre-empt treatment  
22  
23 308 interruption during insecure periods, learning from HIV programme experiences in similar  
24  
25 309 settings.[28] Preparation could include: patient triage by vulnerability (e.g. prioritising insulin-  
26  
27 310 dependent diabetic patients, those with established complications and/or living far from the facility);  
28  
29 311 provision of patient-held personal treatment plans and emergency kits (including several months'  
30  
31 312 supply of medications, such as insulin, delivery devices and guidance as appropriate); building staff  
32  
33 313 capacity to allow for flexibility of roles in crises; establishing networks with other chronic disease  
34  
35 314 programmes; and medication stockpiling and secure storage.[5,28,29] Technology could facilitate  
36  
37 315 continued patient treatment support when access to facilities is impossible e.g. via mobile phone  
38  
39 316 SMS messaging or decentralisation of care to community-based health workers furnished with  
40  
41 317 clinical decision support tools or support via telemedicine.

42  
43  
44  
45  
46  
47 318 The relatively poorer glycaemic control in insulin-prescribed patients may reflect either disease  
48  
49 319 severity or the challenges associated with insulin therapy. Adherence to daily insulin injections is  
50  
51 320 difficult anywhere; in Mweso, the security, financial and geographical barriers to accessing insulin  
52  
53 321 and the unavailability, unaffordability and burden for families brought by the recommended  
54  
55 322 diabetes diet, may additionally contribute to poor adherence.[22] In this programme, clinicians  
56  
57 323 adjusted insulin doses, based on a single fasting glucose reading taken in clinic and on patients'  
58  
59  
60

1  
2  
3 324 reported symptoms in the absence of home glucose monitoring and, therefore, dose adjustment  
4  
5 325 was cautious and treatment targets were conservative.  
6  
7

8 326 There is limited, although growing, evidence on the incidence, prevalence and characterisation of  
9  
10 327 diabetes in Sub-Saharan Africa, which our findings broadly reflect.[30] Several reviews and recent  
11  
12 328 ethnographic evidence describe “atypical” forms of diabetes, which may complicate diagnosis,  
13  
14 329 classification and management. These include “*ketosis-prone atypical diabetes mellitus*” and  
15  
16 330 “*malnutrition-related diabetes*”. [13,16,31] Local prevalence studies support the existence of the  
17  
18 331 latter in the DRC, which is in keeping with the high proportion of underweight adults and  
19  
20 332 “unclassified” diabetics in our cohort.[14,32] It is unclear whether malnutrition is causative,  
21  
22 333 associated with hyperglycaemia or with pancreatic insufficiency and further study of diabetes  
23  
24 334 epidemiology in DRC is needed, exploring factors such as childhood malnutrition, food insecurity and  
25  
26 335 underweight and use of calorie-dense therapeutic foods. [31] Moreover, little evidence exists to  
27  
28 336 guide either malnutrition-related diabetes care or the effective management of insulin in  
29  
30 337 humanitarian settings, particularly in the absence of home or community-based glucose testing.[3,7]  
31  
32  
33 338 The total cost of care delivery decreased by approximately 20% from 2014 to 2015 despite increased  
34  
35 339 visit and patient numbers. This was largely due to decreased supply costs, driven by the 100-fold  
36  
37 340 reduction in consumption of latex gloves following IDC-OPD training. Efficiencies of supply  
38  
39 341 consumption and patient throughput (more visits and more patients seen by the same number of  
40  
41 342 staff) contributed to reducing PPPY costs by 44% from €417 in 2014 to €183 in 2015.  
42  
43  
44  
45  
46

47 343 To our knowledge, there is no available literature to compare cost per patient or per visit for  
48  
49 344 diabetes care (or NCD care generally) delivered in an unstable humanitarian setting. A study from  
50  
51 345 Ghana reported a per patient annual direct cost of US\$372.65 for hospital-delivered diabetes care in  
52  
53 346 2005. For a potential comparator, we looked at the cost of delivering chronic care for HIV, the main  
54  
55 347 life-long condition with which humanitarian actors have traditionally engaged. The 2015 PPPY cost  
56  
57 348 reported in this study is far lower than that reported by PEPFAR and others to deliver chronic HIV  
58  
59  
60

1  
2  
3 349 care programmes in low and middle income countries in SSA [33,34]. In terms of cost structure,  
4  
5 350 supplies were the major cost driver in the Ghanaian study (syringes, lancets and strips), whereas  
6  
7 351 other analyses of diabetes care in SSA identified medications, and specifically insulin, as the main  
8  
9  
10 352 cost contributor [35,36].  
11

### 12 353 **Strengths and Limitations**

13  
14  
15 354 Using routine clinical and programmatic data, with minimal service disruption, we have explored  
16  
17 355 clinical outcomes of a chronic disease programme in a protracted conflict setting and the influence  
18  
19  
20 356 of periods of heightened insecurity on intermediate clinical outcomes and on service delivery. Each  
21  
22 357 patient who attended in a given month contributed data, irrespective of whether they ever  
23  
24 358 experienced a treatment interruption. Our study provides new costing information for humanitarian  
25  
26 359 actors to support the initiation or adaptation of specific NCD programmes and may potentially  
27  
28 360 support scale up of similar services in DRC (and other conflict-affected settings). We concluded that  
29  
30 361 the incremental cost of adding an outpatient diabetes service to a humanitarian health programme  
31  
32 362 in a rural hospital setting may be achieved at a cost similar to that of delivering chronic HIV  
33  
34 363 programmes. While we cannot confirm whether an external audit of cost data had taken place, we  
35  
36 364 are confident in the quality of these data due to MSF's robust systems and oversight by strong in-  
37  
38 365 country and international teams.  
39  
40  
41  
42

43 366 Given the logistical and ethical challenges of undertaking research in conflict settings, we  
44  
45 367 acknowledge that there are a number of limitations to our study. We had a relatively small sample  
46  
47 368 size and no control group for comparison. We did not explore per patient control of clinical  
48  
49 369 parameters over time, control by diabetes type (or age), appropriateness of prescribing, patient-  
50  
51 370 reported outcomes or the influence of psychosocial factors, diet, or adherence in each study phase  
52  
53 371 since these data were unavailable. Gestational diabetes was not addressed since this took place  
54  
55 372 within antenatal services. Our costing analysis was descriptive so we could not comment on  
56  
57 373 programme cost-effectiveness. Costing data were presented as average annual costs and did not  
58  
59  
60

1  
2  
3 374 explore the impact of various programme periods on costs. Since our cost data were aggregate, we  
4  
5 375 could not explore patient-level costs or account for patient heterogeneity. While our findings may  
6  
7 376 not be generalizable to other complex humanitarian settings or to other providers' diabetes  
8  
9  
10 377 programmes in the DRC, our study contributes knowledge on key challenges and suggests solutions,  
11  
12 378 which may be more broadly applicable.

13  
14  
15 379 Future research is needed in complex humanitarian settings to evaluate simplified, task-shared  
16  
17 380 models of diabetes care, including culturally- and contextually-relevant psychosocial support and  
18  
19 381 dietary advice; to optimise insulin management; and to evaluate emergency preparedness plans and  
20  
21 382 technology-facilitated remote patient support.[3,5,8,13,29] We recommend that future prospective  
22  
23 383 studies should explore per-patient outcomes (as well as exploring programme-level outcomes as  
24  
25 384 done in this study). We suggest including a control group, collection of additional outcome variables,  
26  
27 385 such as complication rates and patient-reported outcomes e.g. related to quality-of-life, including  
28  
29 386 functionality and mental health, and exploration of the impact of psychosocial stressors and  
30  
31 387 treatment interruption on clinical outcomes. We also suggest that the cost-effectiveness of different  
32  
33 388 models of diabetes care, including use of technology-facilitated remote support, and patient level  
34  
35 389 costing studies from both provider and patient perspectives should be undertaken, exploring patient  
36  
37 390 heterogeneity and direct and indirect patient costs.

## 391 **Conclusion**

392 Our results help develop the sparse knowledge on the prevalence and characterisation of diabetes in  
393 Sub-Saharan Africa. They demonstrate that diabetes care is feasible even in complex humanitarian  
394 emergencies, and at a cost that is lower than chronic HIV care. The results also indicate that the  
395 Mweso IDC-OPD programme could be further simplified to involve drug collection along with nurse-  
396 led, algorithm-guided treatment adjustment. We suggest that chronic disease programmes in  
397 unstable settings should engage in emergency preparedness, learning from the experience of HIV

1  
2  
3 398 programmes in similar settings. Future research is needed to evaluate simplified, task-shared models  
4  
5 399 of diabetes care and management; and to evaluate emergency preparedness plans and technology-  
6  
7 400 facilitated remote patient support.  
8  
9

10  
11 401

12  
13  
14 402 **List of Abbreviations**

15  
16  
17 403 BMI Body Mass Index  
18  
19 404 BP Blood Pressure  
20  
21 405 DM Diabetes Mellitus  
22  
23  
24 406 DRC Democratic Republic of Congo  
25  
26 407 HIV Human Immunodeficiency Virus  
27  
28 408 IDC-OPD Integrated Diabetic Clinic within Hospital Outpatient Department  
29  
30  
31 409 LMICs Low- and Middle-Income Countries  
32  
33 410 MSF Médecins sans Frontières  
34  
35 411 NCD Noncommunicable Disease  
36  
37 412 OHG Oral Hypoglycaemic Drugs  
38  
39 413 OR Odds Ratio  
40  
41  
42 414 PPPY Per Patient Per Year  
43

44 415

45  
46 416

47  
48  
49 417  
50  
51  
52  
53  
54  
55  
56  
57  
58  
59  
60

1  
2  
3 418 **Declarations**  
4  
5

6  
7 419 ***Ethics approval and consent to participate***  
8  
9

10 420 This study was approved by the Ministry of Health of North Kivu Province, DRC, by the MSF Ethics  
11  
12 421 Review Board, and the Ethics Committee of the London School of Hygiene and Tropical Medicine.  
13  
14 422 Information sheets on the clinic walls provided details of the evaluation; no specific consent was  
15  
16 423 sought from patients for use of their routine clinical data.  
17  
18  
19

20 424 ***Authors' contributions***  
21  
22

23  
24 425 KJ and BR were involved in study conception; EA, GC, KJ, DPM, PP and BR contributed to study  
25  
26 426 design and interpretation of data. DPM and ZS analysed the data. MB contributed to data collection.  
27  
28 427 EA drafted the manuscript and all authors reviewed drafts and approved the final version.  
29  
30

31 428 **Acknowledgements**  
32  
33

34 429 We gratefully acknowledge the staff and patients of the MSF IDC-OPD programme for their  
35  
36 430 contribution to this study. We thank Sarah Venis for her helpful review of the article. This work was  
37  
38 431 presented at MSF Scientific Days Conference in London, May 2018.  
39  
40

41 432 **Competing Interests**  
42  
43

44 433 The authors declare that they have no competing interests.  
45  
46

47 434 **Data Sharing**  
48  
49

50 435 The datasets are available from MSF on request by researchers who fulfil certain criteria and under  
51  
52 436 the auspices of a data sharing agreement.  
53  
54

55 437 **Funding**  
56  
57

58 438 This study was funded by Médecins sans Frontières.  
59  
60



439 **References**

- 440 1 NCD Risk Factor Collaboration (NCD-RisC). Worldwide trends in diabetes since 1980: a pooled  
441 analysis of 751 population-based studies with 4.4 million participants. *Lancet (London,  
442 England)* 2016;**387**:1513–30. doi:10.1016/S0140-6736(16)00618-8
- 443 2 Kehlenbrink S, Smith J, Ansbro É, *et al.* The burden of diabetes and use of diabetes care in  
444 humanitarian crises in low-income and middle-income countries. *Lancet Diabetes Endocrinol*  
445 2019;**0**. doi:10.1016/S2213-8587(19)30082-8
- 446 3 Demaio A, Jamieson J, Horn R, *et al.* Non-Communicable Diseases in Emergencies: A Call to  
447 Action. *PLoS Curr* Published Online First: 2013.  
448 doi:10.1371/currents.dis.53e08b951d59ff913ab8b9bb51c4d0de
- 449 4 Roberts B, Patel P, McKee M. Noncommunicable diseases and post-conflict countries. *Bull*  
450 *World Health Organ* 2011;**90**:2-2A. doi:10.2471/BLT.11.098863
- 451 5 Besançon S, Fall I-S, Doré M, *et al.* Diabetes in an emergency context: the Malian case study.  
452 *Confl Health* 2015;**9**:15. doi:10.1186/s13031-015-0042-9
- 453 6 Boulle P, Kehlenbrink S, Smith J, *et al.* Challenges associated with providing diabetes care in  
454 humanitarian settings. *Lancet Diabetes Endocrinol* 2019;**0**. doi:10.1016/S2213-  
455 8587(19)30083-X
- 456 7 Ruby A, Knight A, Perel P, *et al.* The Effectiveness of Interventions for Non-Communicable  
457 Diseases in Humanitarian Crises: A Systematic Review. *PLoS One* 2015;**10**:e0138303.  
458 doi:10.1371/journal.pone.0138303
- 459 8 Jobanputra K, Boulle P, Roberts B, *et al.* Three Steps to Improve Management of  
460 Noncommunicable Diseases in Humanitarian Crises. *PLOS Med* 2016;**13**:e1002180.  
461 doi:10.1371/journal.pmed.1002180

- 1  
2  
3 462 9 International Rescue Committee. Mortality in the Democratic Republic of Congo: An ongoing  
4 crisis | International Rescue Committee (IRC). 2007.  
5 463  
6  
7 464 <https://www.rescue.org/report/mortality-democratic-republic-congo-ongoing-crisis>  
8 (accessed 10 Dec 2017).  
9 465  
10  
11  
12 466 10 UNHCR - UNHCR Global Trends 2018. Geneva.  
13 2019.[https://www.unhcr.org/uk/statistics/unhcrstats/5d08d7ee7/unhcr-global-trends-](https://www.unhcr.org/uk/statistics/unhcrstats/5d08d7ee7/unhcr-global-trends-2018.html)  
14 2018.html (accessed 1 Jul 2019).  
15 467  
16  
17 468  
18  
19 469 11 Human Development Indices and Indicators: 2018 Statistical Update Congo (Democratic  
20 Republic of the). <http://hdr.undp.org/en/data> (accessed 30 Jul 2019).  
21 470  
22  
23 471 12 Whiting DR, Guariguata L, Weil C, *et al*. IDF diabetes atlas: global estimates of the prevalence  
24 of diabetes for 2011 and 2030. *Diabetes Res Clin Pract* 2011;**94**:311–21.  
25 472  
26  
27 473 doi:10.1016/j.diabres.2011.10.029  
28  
29 474 13 Atun R, Davies JI, Gale EAM, *et al*. Diabetes in sub-Saharan Africa: from clinical care to health  
30 policy. *lancet Diabetes Endocrinol* 2017;**5**:622–67. doi:10.1016/S2213-8587(17)30181-X  
31 475  
32  
33 476 14 Muyer MT, Muls E, Mapatano MA, *et al*. Diabetes and intermediate hyperglycaemia in  
34 Kisantu, DR Congo: a cross-sectional prevalence study. *BMJ Open* 2012;**2**:e001911.  
35 477  
36  
37 478 doi:10.1136/bmjopen-2012-001911  
38  
39 479 15 A sub-Saharan African perspective of diabetes.  
40 file:///C:/Users/DAnsbro/Downloads/0f317533c181fe640b000000.pdf (accessed 30 Jan  
41 480  
42 2015).  
43 481  
44  
45 482 16 Carruth L, Mendenhall E. “Wasting away”: Diabetes, food insecurity, and medical insecurity in  
46 the Somali Region of Ethiopia. *Soc Sci Med* 2019;**228**:155–63.  
47 483  
48  
49 484 doi:10.1016/J.SOCSCIMED.2019.03.026  
50  
51  
52  
53  
54  
55  
56  
57  
58  
59  
60

- 1  
2  
3 485 17 Food and Agriculture Organisation of the United Nations. FAO - News Article: Food insecurity  
4  
5 486 soars in conflict-ridden Democratic Republic of Congo.  
6  
7 487 <http://www.fao.org/news/story/en/item/1028934/icode/> (accessed 5 Aug 2019).  
8  
9  
10 488 18 Harris ML, Oldmeadow C, Hure A, *et al.* Stress increases the risk of type 2 diabetes onset in  
11  
12 women: A 12-year longitudinal study using causal modelling. *PLoS One* 2017;**12**:e0172126.  
13 489  
14 doi:10.1371/journal.pone.0172126  
15 490  
16  
17 491 19 World diabetes Foundation. Projects. Improving diabetes care WDF05-128.  
18  
19 <https://www.worlddiabetesfoundation.org/projects/congo-kinshasa-wdf05-128> (accessed 5  
20 492  
21 Aug 2019).  
22 493  
23  
24 494 20 Valentijn PP, Schepman SM, Opheij W, *et al.* Understanding integrated care: a comprehensive  
25  
26 conceptual framework based on the integrative functions of primary care. *Int J Integr Care*  
27 495  
28 2013;**13**:e010. doi:10.5334/ijic.886  
29 496  
30  
31 497 21 Ansbro ÉM. MSF OCA Mweso Guide de diabète pour patients ambulatoires. 2015.  
32  
33  
34 498 22 Murphy A, Biringanine M, Roberts B, *et al.* Diabetes care in a complex humanitarian  
35  
36 emergency setting: a qualitative evaluation. *BMC Health Serv Res* 2017;**17**:431.  
37 499  
38 doi:<https://dx.doi.org/10.1186/s12913-017-2362-5>  
39 500  
40  
41 501 23 Jobanputra K, Ansbro E. Diabetes service evaluation (2014-2017) – main findings from  
42  
43 Mweso, North Kivu, the Democratic Republic of Congo. Published Online First:  
44 502  
45 2018.<https://fieldresearch.msf.org/handle/10144/619307> (accessed 12 May 2019).  
46 503  
47  
48 504 24 ONG Santé Diabète / NGO Health Diabetes - Home. <https://santediabete.org/en/> (accessed  
49 505  
50 20 Aug 2018).  
51  
52  
53 506 25 Ogle GD, Abdullah M, Mason D, *et al.* Insulin storage in hot climates without refrigeration:  
54  
55 temperature reduction efficacy of clay pots and other techniques. *Diabet Med* 2016;**33**:1544–  
56 507  
57  
58  
59  
60

- 1  
2  
3 508 53. doi:10.1111/dme.13194  
4  
5  
6 509 26 Blanchet K, Ramesh A, Frison S, *et al.* Evidence on public health interventions in humanitarian  
7  
8 510 crises. *Lancet (London, England)* 2017;**390**:2287–96. doi:10.1016/S0140-6736(16)30768-1  
9  
10  
11 511 27 Cohen DB, Allain TJ, Glover S, *et al.* A survey of the management, control, and complications  
12  
13 512 of diabetes mellitus in patients attending a diabetes clinic in Blantyre, Malawi, an area of high  
14  
15 513 HIV prevalence. *Am J Trop Med Hyg* 2010;**83**:575–81. doi:10.4269/ajtmh.2010.10-0104  
16  
17  
18 514 28 Culbert H, Tu D, O'Brien DP, *et al.* HIV Treatment in a Conflict Setting: Outcomes and  
19  
20 515 Experiences from Bukavu, Democratic Republic of the Congo. *PLoS Med* 2007;**4**:e129.  
21  
22 516 doi:10.1371/journal.pmed.0040129  
23  
24  
25  
26 517 29 Slama S, Kim H-J, Roglic G, *et al.* Care of non-communicable diseases in emergencies. *Lancet*  
27  
28 518 (*London, England*) 2017;**389**:326–30. doi:10.1016/S0140-6736(16)31404-0  
29  
30  
31 519 30 Hall V, Thomsen RW, Henriksen O, *et al.* Diabetes in Sub Saharan Africa 1999-2011:  
32  
33 520 Epidemiology and public health implications. a systematic review. *BMC Public Health*  
34  
35 521 2011;**11**:564. doi:10.1186/1471-2458-11-564  
36  
37  
38 522 31 Gill G V., Mbanya J-C, Ramaiya KL, *et al.* A sub-Saharan African perspective of diabetes.  
39  
40 523 *Diabetologia* 2009;**52**:8–16. doi:10.1007/s00125-008-1167-9  
41  
42  
43 524 32 Hightower JD, Hightower CM, Vázquez BYS, *et al.* Incident prediabetes/diabetes and blood  
44  
45 525 pressure in urban and rural communities in the Democratic Republic of Congo. *Vasc Health*  
46  
47 526 *Risk Manag* 2011;**7**:483–9. doi:10.2147/VHRM.S22707  
48  
49  
50  
51 527 33 Bikilla A, Jerene D, Robberstad B, *et al.* Cost estimates of HIV care and treatment with and  
52  
53 528 without anti-retroviral therapy at Arba Minch Hospital in southern Ethiopia. *Cost Eff Resour*  
54  
55 529 *Alloc* 2009;**7**:6. doi:10.1186/1478-7547-7-6  
56  
57  
58 530 34 2013 Report on Costs of Treatment in the President's Emergency Plan for AIDS Relief  
59  
60

- 1  
2  
3 531 (PEPFAR) Background. <https://www.pepfar.gov/documents/organization/212059.pdf>  
4  
5 532 (accessed 21 Dec 2017).  
6  
7  
8 533 35 Quaye EA, Amporful EO, Akweongo P, *et al*. Analysis of the Financial Cost of Diabetes Mellitus  
9  
10 534 in Four Cocoa Clinics of Ghana. *Value Heal Reg Issues* 2015;**7**:49–53.  
11  
12  
13 535 doi:10.1016/j.vhri.2015.08.005  
14  
15 536 36 Kirigia JM, Sambo HB, Sambo LG, *et al*. Economic burden of diabetes mellitus in the WHO  
16  
17 African region. *BMC Int Health Hum Rights* 2009;**9**:6. doi:10.1186/1472-698X-9-6  
18  
19  
20  
21  
22  
23  
24  
25  
26  
27  
28  
29  
30  
31  
32  
33  
34  
35  
36  
37  
38  
39  
40  
41  
42  
43  
44  
45  
46  
47  
48  
49  
50  
51  
52  
53  
54  
55  
56  
57  
58  
59  
60

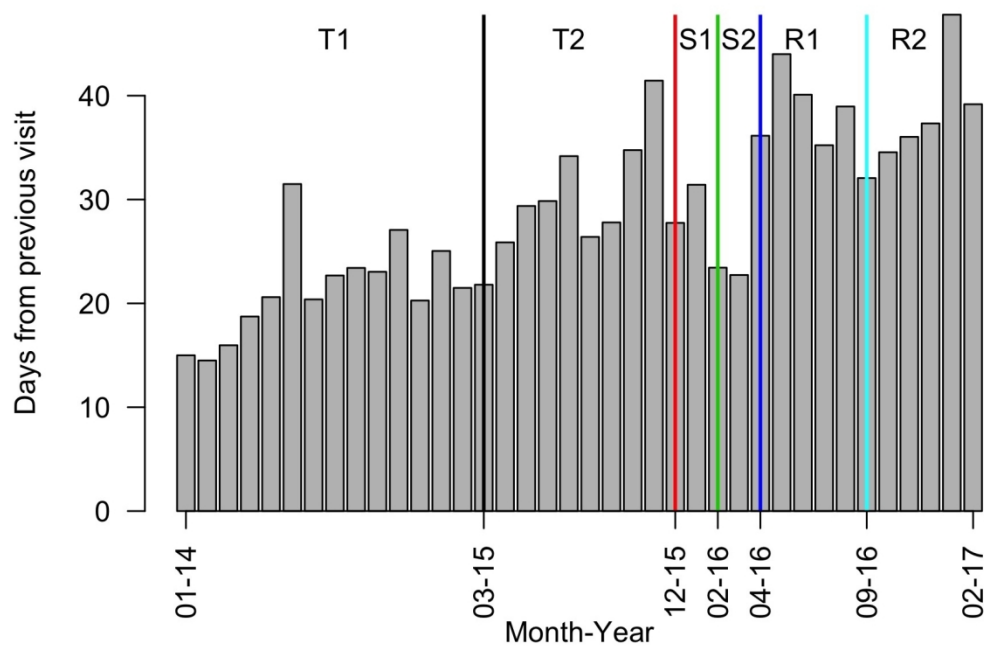

Figure 1: Average number of days from previous visit per month for Mweso IDC-OPD service

615x436mm (72 x 72 DPI)

1  
2  
3  
4  
5  
6  
7  
8  
9  
10  
11  
12  
13  
14  
15  
16  
17  
18  
19  
20  
21  
22  
23  
24  
25  
26  
27  
28  
29  
30  
31  
32  
33  
34  
35  
36  
37  
38  
39  
40  
41  
42  
43  
44  
45  
46  
47  
48  
49  
50  
51  
52  
53  
54  
55  
56  
57  
58  
59  
60

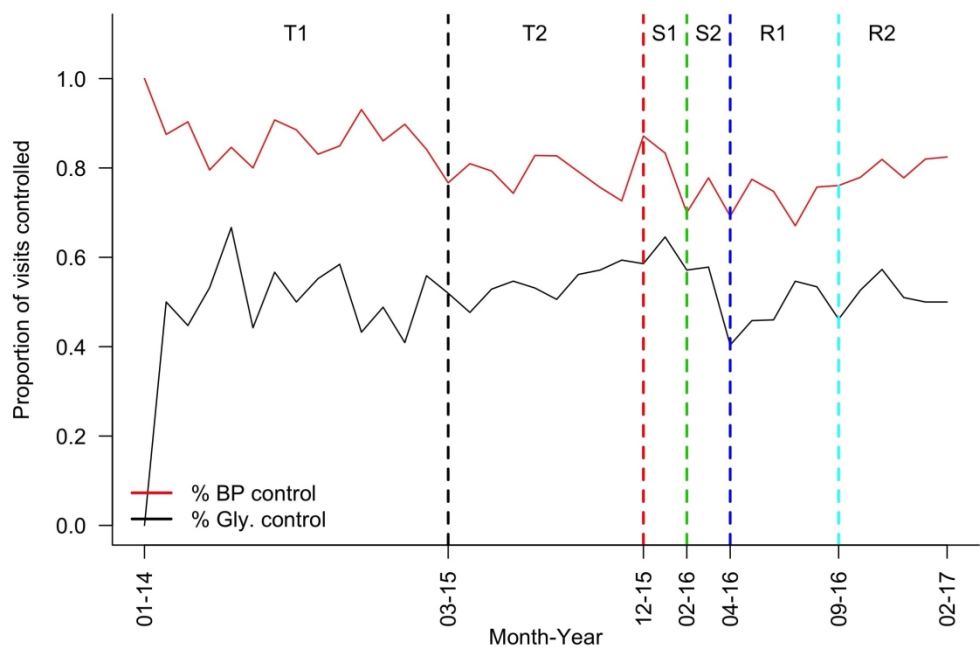

Figure 2: Proportion of visits with BP or glycaemia at target by month, Mweso IDC-OPD service  
809x558mm (72 x 72 DPI)

SM1. Proportion of visits with missing data for either blood pressure or glycaemia measurements, IDC-OPD Programme, Mweso, DRC

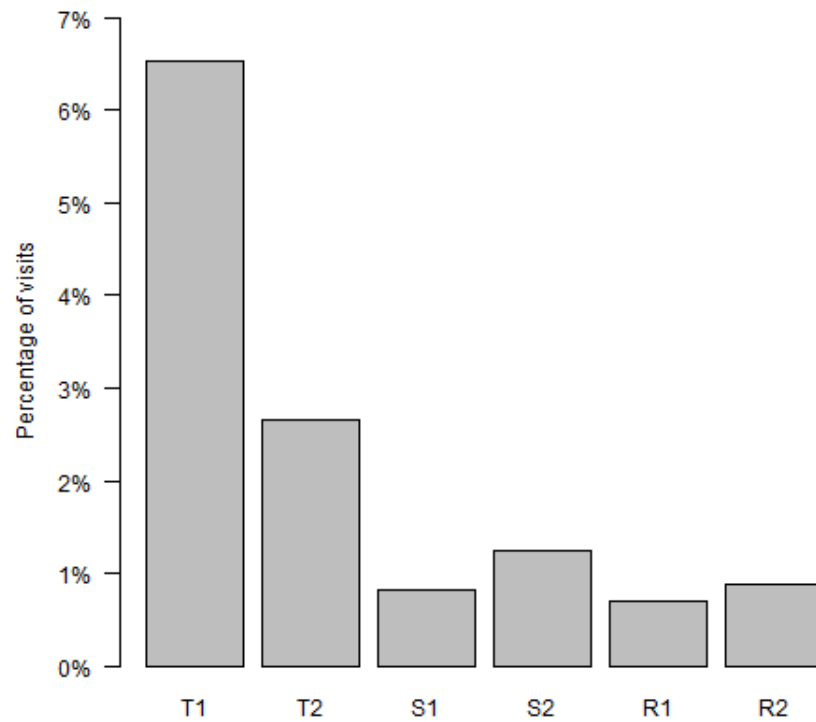

Note: Definitions of study periods T1 – R2 are described in Supplementary Data S1



## SM2. Monthly resource use associated with IDC-OPD in Mweso Hospital, North Kivu,

## DRC

| Items                                                        | Unit   | 2014   | 2015   |
|--------------------------------------------------------------|--------|--------|--------|
| <b>Medicine</b>                                              |        |        |        |
| INSULIN ISOPHANE (NPH), human, 100 UI/ml, 10 ml, vial        | 6.300  | 40     | 40     |
| INSULIN RAPID, human, 100 IU/ml, 10 ml, vial                 | 6.300  | 8      | 8      |
| INSULIN, 100IU/ml, BIPHASIC 30, human, 10ml, vial            | 13.610 | 10     | 10     |
| METFORMIN hydrochloride, 500 mg, tab.                        | 0.014  | 5,300  | 12,000 |
| GLIBENCLAMIDE, 5 mg, tab.                                    | 0.005  | 750    | 3,600  |
| HYDROCHLOROTHIAZIDE, 50 mg, tab.                             | 0.003  | 0      | 300    |
| GLUCOSE HYPERTONIC, 50%, 50 ml, vial                         | 0.556  | 75     | 6      |
| AMITRIPTYLINE hydrochloride, 25 mg, tab.                     | 0.006  | 200    | 750    |
| ACETYLSALICYLIC acid (aspirin), 75 mg, tab.                  | 0.005  | 0      | 2,000  |
| AMLODIPINE 5mg, tabs.                                        | 0.018  | 0      | 300    |
| <b>Supplies</b>                                              |        |        |        |
| GLUCOMETER, blood glucose monitor (Nova StatStrip) + strips  | 96.705 | 5      | 10     |
| (glucometer Nova StatStrip) STRIP ref. 42214                 | 0.230  | 2,000  | 4,000  |
| SYRINGE, s.u., Luer, insulin, 100 IU/1 ml + fixed needle     | 0.079  | 2,000  | 4,000  |
| (spectrophotometer) KIT, DOSAGE CREATININE, Liquicolor 200ml | 4.830  | 3.5    | 3.5    |
| THERMOMETER, ELECTRONIC, accuracy 0.1§ C + case              | 1.110  | 20     | 3      |
| SPHYGMOMANOMETER, one-hand manometer, Velcro, adult          | 26.000 | 0      | 1      |
| TEST, URINE, pH,dens,prot,gluc,ket,blood,nit,leuc, 1 strip   | 0.197  | 100    | 200    |
| REUSABLE SHARPS CONTAINER (RSC), 1.2 litre                   | 44.750 | 1      | 1      |
| CONTAINER, SAMPLE, plast., 60ml, non sterile, urine          | 0.083  | 1,700  | 200    |
| LANCET, s.u., sterile, standard point                        | 0.006  | 900    | 4,000  |
| GLOVE, EXAMINATION, latex, s.u. non sterile, medium          | 0.025  | 50,000 | 500    |
| <b>Staff time (days allocated to diabetes care)*</b>         |        |        |        |
| MSF Medical doctor                                           | 1,350  | 1      | 1      |
| MSF Nurse                                                    | 900    | 1      | 1      |
| BCZ Nurse                                                    | 239    | 1      | 1      |
| MSF psychosocial worker                                      | 1,422  | 0.125  | 0.125  |
| 1 Nutritionist (MSF)                                         | 864    | 0.0625 | 0.0625 |

\*Note: Staff time costs assumed 22 full-time working days per month.

## S3. Baseline characteristics of 243 patients on enrolment into Mwes0 IDC-OPD service

| Variable               | Total | (%)     | DM-1 | (%)     | DM-2 | (%)     | Other/NA | (%)            |
|------------------------|-------|---------|------|---------|------|---------|----------|----------------|
| <b>Patients (N)</b>    | 243   |         | 62   |         | 125  |         | 56       |                |
| <b>Age</b>             |       |         |      |         |      |         |          |                |
| <18                    | 24    | (9.9%)  | 19   | (30.6%) | 0    | (0.0%)  | 5        | <b>(8.9%)</b>  |
| 18-40                  | 74    | (30.5%) | 39   | (62.9%) | 20   | (16.0%) | 15       | <b>(26.8%)</b> |
| 41-60                  | 112   | (46.1%) | 3    | (4.8%)  | 80   | (64.0%) | 29       | <b>(51.8%)</b> |
| >60                    | 33    | (13.6%) | 1    | (1.6%)  | 25   | (20.0%) | 7        | <b>(12.5%)</b> |
| <b>Sex</b>             |       |         |      |         |      |         |          |                |
| Male                   | 134   | (55.1%) | 34   | (54.8%) | 70   | (56.0%) | 30       | <b>(53.6%)</b> |
| Female                 | 108   | (44.4%) | 28   | (45.2%) | 55   | (44.0%) | 25       | <b>(44.6%)</b> |
| No data                | 1     | (0.4%)  | 0    | (0.0%)  | 0    | (0.0%)  | 1        | <b>(1.8%)</b>  |
| <b>Occupation</b>      |       |         |      |         |      |         |          |                |
| Labourer               | 121   | (49.8%) | 29   | (46.8%) | 85   | (68.0%) | 7        | <b>(12.5%)</b> |
| Office worker          | 19    | (7.8%)  | 2    | (3.2%)  | 11   | (8.8%)  | 6        | <b>(10.7%)</b> |
| Student                | 8     | (3.3%)  | 8    | (12.9%) | 0    | (0.0%)  | 0        | <b>(0.0%)</b>  |
| Unable to work         | 11    | (4.5%)  | 7    | (11.3%) | 3    | (2.4%)  | 1        | <b>(1.8%)</b>  |
| Other                  | 48    | (19.8%) | 15   | (24.2%) | 26   | (20.8%) | 7        | <b>(12.5%)</b> |
| No data                | 36    | (14.8%) | 1    | (1.6%)  | 0    | (0.0%)  | 35       | <b>(62.5%)</b> |
| <b>Medical History</b> |       |         |      |         |      |         |          |                |
| <b>CVD</b>             |       |         |      |         |      |         |          |                |
| Yes                    | 5     | (2.1%)  | 1    | (1.6%)  | 3    | (2.4%)  | 1        | <b>(1.8%)</b>  |
| No data                | 24    | (9.9%)  | 0    | (0.0%)  | 0    | (0.0%)  | 24       | <b>(42.9%)</b> |
| <b>Hypertension</b>    |       |         |      |         |      |         |          |                |
| Yes                    | 20    | (8.2%)  | 0    | (0.0%)  | 18   | (14.4%) | 2        | <b>(3.6%)</b>  |
| No data                | 25    | (10.3%) | 0    | (0.0%)  | 1    | (0.8%)  | 24       | <b>(42.9%)</b> |
| <b>Tuberculosis</b>    |       |         |      |         |      |         |          |                |
| Yes                    | 6     | (2.5%)  | 1    | (1.6%)  | 5    | (4.0%)  | 0        | <b>(0.0%)</b>  |
| No data                | 24    | (9.9%)  | 0    | (0.0%)  | 0    | (0.0%)  | 24       | <b>(42.9%)</b> |
| <b>Malnutrition</b>    |       |         |      |         |      |         |          |                |
| Yes                    | 19    | (7.8%)  | 15   | (24.2%) | 2    | (1.6%)  | 2        | <b>(3.6%)</b>  |
| No data                | 24    | (9.9%)  | 0    | (0.0%)  | 0    | (0.0%)  | 24       | <b>(42.9%)</b> |
| <b>Family Hx of DM</b> |       |         |      |         |      |         |          |                |
| Yes                    | 35    | (14.4%) | 6    | (9.7%)  | 23   | (18.4%) | 6        | <b>(10.7%)</b> |
| No data                | 24    | (9.9%)  | 0    | (0.0%)  | 0    | (0.0%)  | 24       | <b>(42.9%)</b> |

| <b>Patients &gt;=18 years(N)*</b> | 219        | 43         | 125        | 51         |
|-----------------------------------|------------|------------|------------|------------|
| <b>Smoking</b>                    |            |            |            |            |
| Yes                               | 18 (8.2%)  | 1 (2.3%)   | 16 (12.8%) | 1 (2.0%)   |
| No data                           | 21 (9.6%)  | 0 (0.0%)   | 0 (0.0%)   | 21 (41.2%) |
| <b>Alcohol</b>                    |            |            |            |            |
| Yes                               | 50 (22.8%) | 12 (27.9%) | 32 (25.6%) | 6 (11.8%)  |
| No data                           | 33 (15.1%) | 0 (0.0%)   | 1 (0.8%)   | 32 (62.7%) |
| <b>BMI</b>                        |            |            |            |            |
| <18.5                             | 68 (31.1%) | 23 (53.5%) | 34 (27.2%) | 11 (21.6%) |
| 18.5-24.9                         | 96 (43.8%) | 15 (34.9%) | 59 (47.2%) | 22 (43.1%) |
| 25.0-29.9                         | 41 (18.7%) | 5 (11.6%)  | 27 (21.6%) | 9 (17.6%)  |
| >=30                              | 7 (3.2%)   | 0 (0.0%)   | 5 (4.0%)   | 2 (3.9%)   |
| No data                           | 7 (3.2%)   | 0 (0.0%)   | 0 (0.0%)   | 7 (13.7%)  |

Note: For smoking, alcohol and BMI, denominators included only patients aged 18 years or above.

1  
2  
3  
4  
5  
6  
7  
8  
9  
10  
11  
12  
13  
14  
15  
16  
17  
18  
19  
20  
21  
22  
23  
24  
25  
26  
27  
28  
29  
30  
31  
32  
33  
34  
35  
36  
37  
38  
39  
40  
41  
42  
43  
44  
45  
46  
47  
48  
49  
50  
51  
52  
53  
54  
55  
56  
57  
58  
59  
60

For peer review only

1  
2  
3  
4  
5  
6  
7  
8  
9  
10  
11  
12  
13  
14  
15  
16  
17  
18  
19  
20  
21  
22  
23  
24  
25  
26  
27  
28  
29  
30  
31  
32  
33  
34  
35  
36  
37  
38  
39  
40  
41  
42  
43  
44  
45  
46  
47  
48  
49  
50  
51  
52  
53  
54  
55  
56  
57  
58  
59  
60

For peer review only

SM4. Average days' delay in attendance since planned appointment per month of

IDC-OPD service, Mweso, DRC

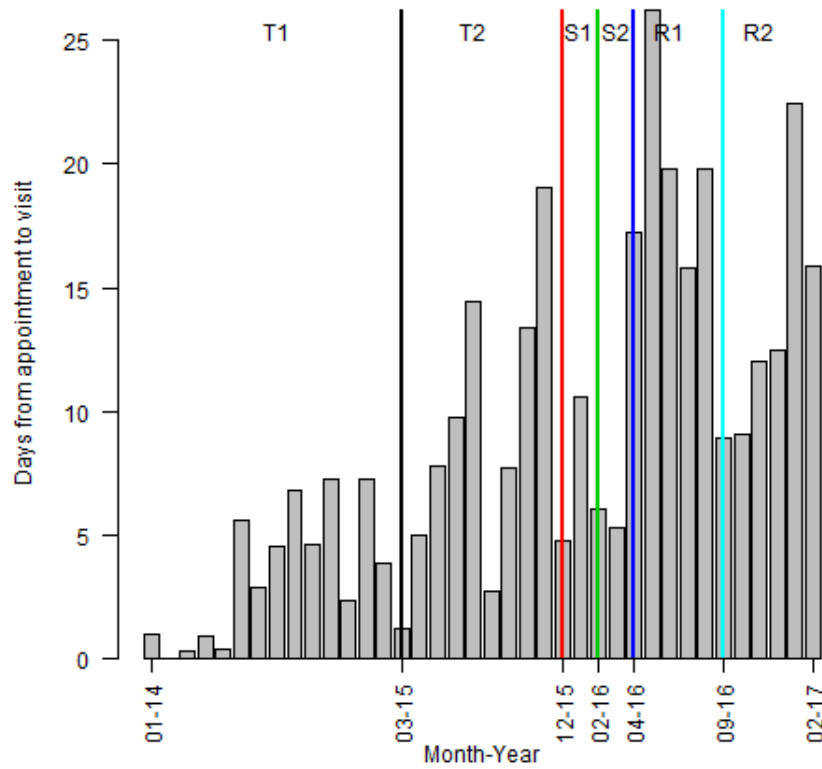

Review only

SM5. Proportion of visits at target for BP and glycaemic control, stratified by insulin prescription per month of IDC-OPD service, Mweso, DRC

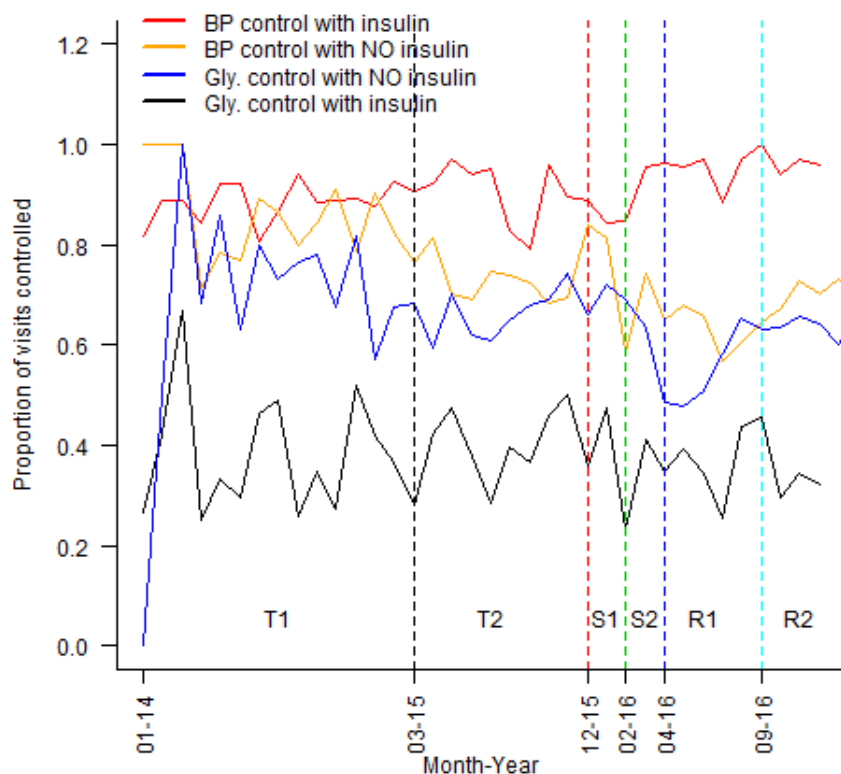

Note: Patients were categorised by whether they were prescribed insulin [+/- oral hypoglycaemic (OHG) drugs] or OHG drugs alone at their last recorded visit. The former group would have included Type 1 diabetics, Type 2 diabetics with more advance illness requiring a combination of OHG and insulin, and those with an intermediate type of diabetes, presenting with high insulin requirements in the absence of diabetic ketoacidosis, which we postulated represented “malnutrition-related diabetes”. The latter group were likely to include Type 2 diabetics.

SM6. Impact (OR) on BP and glycaemic control of study period over previous period, unstratified (A) and stratified by insulin prescription (B and C) per month of IDC-OPD service, Mweso, DRC

A. Impact (OR) on BP and glycaemia in all patients (not stratified by insulin prescription)

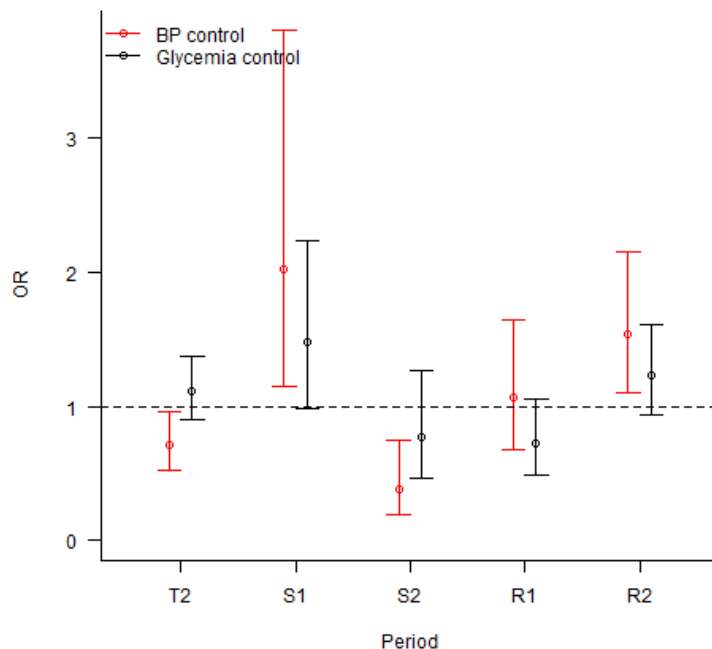

B. Impact (OR) on BP and glycaemia in patients on oral hypoglycaemic drugs only

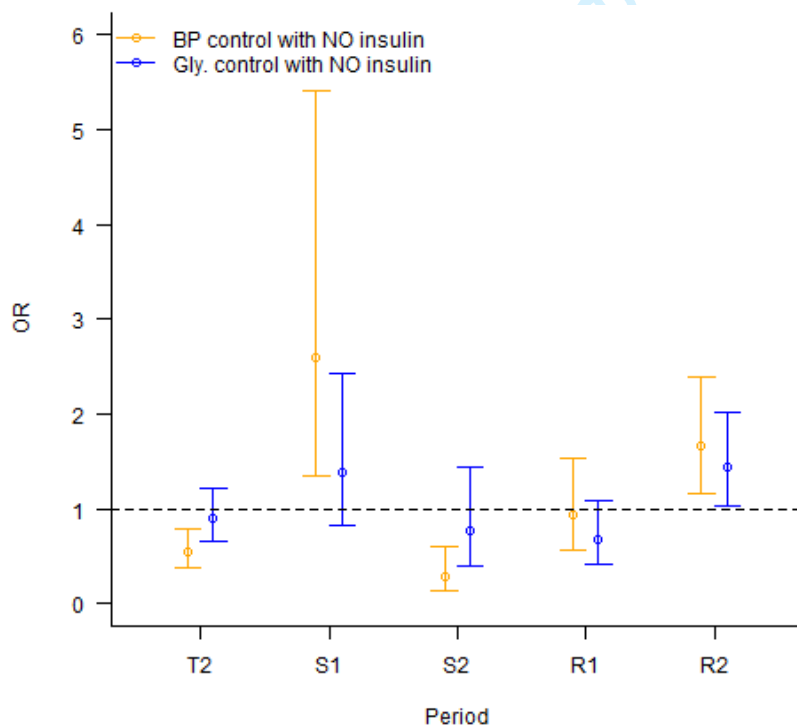



C. Impact (OR) on BP and glycaemia in patients prescribed insulin (+/- OHG)

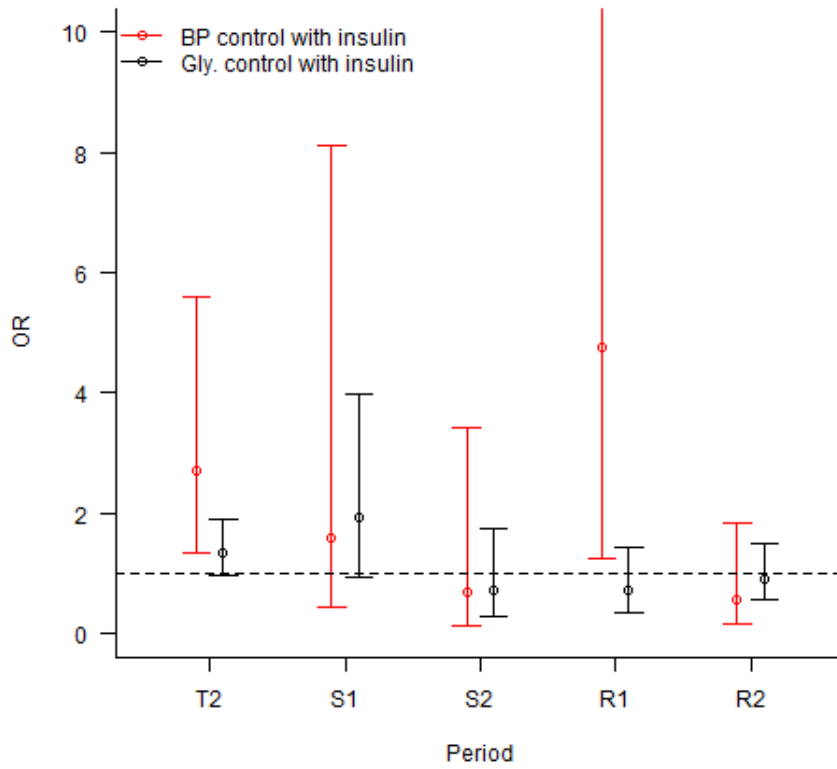

Review only

STROBE Statement—Checklist of items that should be included in reports of *cross-sectional studies*

**Study Title: Management of diabetes and associated costs in a complex humanitarian setting in the Democratic Republic of Congo: a retrospective cohort study.**

|                              | Item No | Recommendation                                                                                                                                                                                    | Page No      |
|------------------------------|---------|---------------------------------------------------------------------------------------------------------------------------------------------------------------------------------------------------|--------------|
| <b>Title and abstract</b>    | 1       | (a) Indicate the study's design with a commonly used term in the title or the abstract                                                                                                            | 1,4          |
|                              |         | (b) Provide in the abstract an informative and balanced summary of what was done and what was found                                                                                               | 2-3          |
| <b>Introduction</b>          |         |                                                                                                                                                                                                   |              |
| Background/rationale         | 2       | Explain the scientific background and rationale for the investigation being reported                                                                                                              | 4-7          |
| Objectives                   | 3       | State specific objectives, including any prespecified hypotheses                                                                                                                                  | 7            |
| <b>Methods</b>               |         |                                                                                                                                                                                                   |              |
| Study design                 | 4       | Present key elements of study design early in the paper                                                                                                                                           | 7-11         |
| Setting                      | 5       | Describe the setting, locations, and relevant dates, including periods of recruitment, exposure, follow-up, and data collection                                                                   | 4,5,7, 8, 11 |
| Participants                 | 6       | (a) Give the eligibility criteria, and the sources and methods of selection of participants                                                                                                       | 7            |
| Variables                    | 7       | Clearly define all outcomes, exposures, predictors, potential confounders, and effect modifiers. Give diagnostic criteria, if applicable                                                          | 6,9,10       |
| Data sources/<br>measurement | 8*      | For each variable of interest, give sources of data and details of methods of assessment (measurement). Describe comparability of assessment methods if there is more than one group              | 6            |
| Bias                         | 9       | Describe any efforts to address potential sources of bias                                                                                                                                         | n/a          |
| Study size                   | 10      | Explain how the study size was arrived at                                                                                                                                                         | 7            |
| Quantitative variables       | 11      | Explain how quantitative variables were handled in the analyses. If applicable, describe which groupings were chosen and why                                                                      | 10           |
| Statistical methods          | 12      | (a) Describe all statistical methods, including those used to control for confounding                                                                                                             | 10           |
|                              |         | (b) Describe any methods used to examine subgroups and interactions                                                                                                                               | 10           |
|                              |         | (c) Explain how missing data were addressed                                                                                                                                                       | 10,11        |
|                              |         | (d) If applicable, describe analytical methods taking account of sampling strategy                                                                                                                | 10           |
|                              |         | (e) Describe any sensitivity analyses                                                                                                                                                             | n/a          |
| <b>Results</b>               |         |                                                                                                                                                                                                   |              |
| Participants                 | 13*     | (a) Report numbers of individuals at each stage of study—eg numbers potentially eligible, examined for eligibility, confirmed eligible, included in the study, completing follow-up, and analysed | 10           |
|                              |         | (b) Give reasons for non-participation at each stage                                                                                                                                              | n/a          |
|                              |         | (c) Consider use of a flow diagram                                                                                                                                                                | n/a          |
| Descriptive data             | 14*     | (a) Give characteristics of study participants (eg demographic, clinical, social) and information on exposures and potential confounders                                                          | Supp Mat 3   |
|                              |         | (b) Indicate number of participants with missing data for each variable of interest                                                                                                               | Supp Mat 1   |
| Outcome data                 | 15*     | Report numbers of outcome events or summary measures                                                                                                                                              | 9,10         |

|    |                          |    |                                                                                                                                                                                                              |
|----|--------------------------|----|--------------------------------------------------------------------------------------------------------------------------------------------------------------------------------------------------------------|
| 1  |                          |    |                                                                                                                                                                                                              |
| 2  | Main results             | 16 | (a) Give unadjusted estimates and, if applicable, confounder-adjusted estimates and their precision (eg, 95% confidence interval). Make clear which confounders were adjusted for and why they were included |
| 3  |                          |    | n/a                                                                                                                                                                                                          |
| 4  |                          |    |                                                                                                                                                                                                              |
| 5  |                          |    |                                                                                                                                                                                                              |
| 6  |                          |    | (b) Report category boundaries when continuous variables were categorized                                                                                                                                    |
| 7  |                          |    | Supp                                                                                                                                                                                                         |
| 8  |                          |    | Mat 3                                                                                                                                                                                                        |
| 9  |                          |    |                                                                                                                                                                                                              |
| 10 |                          |    | (c) If relevant, consider translating estimates of relative risk into absolute risk for a meaningful time period                                                                                             |
| 11 | Other analyses           | 17 | Report other analyses done—eg analyses of subgroups and interactions, and sensitivity analyses                                                                                                               |
| 12 |                          |    | n/a                                                                                                                                                                                                          |
| 13 |                          |    |                                                                                                                                                                                                              |
| 14 | <b>Discussion</b>        |    |                                                                                                                                                                                                              |
| 15 | Key results              | 18 | Summarise key results with reference to study objectives                                                                                                                                                     |
| 16 | Limitations              | 19 | Discuss limitations of the study, taking into account sources of potential bias or imprecision. Discuss both direction and magnitude of any potential bias                                                   |
| 17 |                          |    | 12-14                                                                                                                                                                                                        |
| 18 |                          |    | 17,18                                                                                                                                                                                                        |
| 19 |                          |    |                                                                                                                                                                                                              |
| 20 | Interpretation           | 20 | Give a cautious overall interpretation of results considering objectives, limitations, multiplicity of analyses, results from similar studies, and other relevant evidence                                   |
| 21 |                          |    | 14-16                                                                                                                                                                                                        |
| 22 |                          |    |                                                                                                                                                                                                              |
| 23 |                          |    |                                                                                                                                                                                                              |
| 24 | Generalisability         | 21 | Discuss the generalisability (external validity) of the study results                                                                                                                                        |
| 25 |                          |    | 18                                                                                                                                                                                                           |
| 26 | <b>Other information</b> |    |                                                                                                                                                                                                              |
| 27 | Funding                  | 22 | Give the source of funding and the role of the funders for the present study and, if applicable, for the original study on which the present article is based                                                |
| 28 |                          |    | 20                                                                                                                                                                                                           |
| 29 |                          |    |                                                                                                                                                                                                              |
| 30 |                          |    |                                                                                                                                                                                                              |

\*Give information separately for exposed and unexposed groups.

**Note:** An Explanation and Elaboration article discusses each checklist item and gives methodological background and published examples of transparent reporting. The STROBE checklist is best used in conjunction with this article (freely available on the Web sites of PLoS Medicine at <http://www.plosmedicine.org/>, Annals of Internal Medicine at <http://www.annals.org/>, and Epidemiology at <http://www.epidem.com/>). Information on the STROBE Initiative is available at [www.strobe-statement.org](http://www.strobe-statement.org).

# BMJ Open

## Management of diabetes and associated costs in a complex humanitarian setting in the Democratic Republic of Congo: a retrospective cohort study

|                                 |                                                                                                                                                                                                                                                                                                                                                                                                                                                                                                                                                                                                                                                                                                                                                                                                                                                                                                                                                                                                                                      |
|---------------------------------|--------------------------------------------------------------------------------------------------------------------------------------------------------------------------------------------------------------------------------------------------------------------------------------------------------------------------------------------------------------------------------------------------------------------------------------------------------------------------------------------------------------------------------------------------------------------------------------------------------------------------------------------------------------------------------------------------------------------------------------------------------------------------------------------------------------------------------------------------------------------------------------------------------------------------------------------------------------------------------------------------------------------------------------|
| Journal:                        | <i>BMJ Open</i>                                                                                                                                                                                                                                                                                                                                                                                                                                                                                                                                                                                                                                                                                                                                                                                                                                                                                                                                                                                                                      |
| Manuscript ID                   | bmjopen-2019-030176.R2                                                                                                                                                                                                                                                                                                                                                                                                                                                                                                                                                                                                                                                                                                                                                                                                                                                                                                                                                                                                               |
| Article Type:                   | Original research                                                                                                                                                                                                                                                                                                                                                                                                                                                                                                                                                                                                                                                                                                                                                                                                                                                                                                                                                                                                                    |
| Date Submitted by the Author:   | 22-Oct-2019                                                                                                                                                                                                                                                                                                                                                                                                                                                                                                                                                                                                                                                                                                                                                                                                                                                                                                                                                                                                                          |
| Complete List of Authors:       | <p>Ansbro, Éimhín; Médecins sans Frontières, Manson Unit; London School of Hygiene and Tropical Medicine Faculty of Epidemiology and Population Health, Centre for Global Chronic Conditions</p> <p>Biringanine, Michel; Medecins Sans Frontieres Operational Centre Amsterdam, Mweso Hospital</p> <p>Caleo, Grazia; Médecins sans Frontières, Manson Unit</p> <p>Prieto-Merino, David; London School of Hygiene and Tropical Medicine Faculty of Epidemiology and Population Health, Epidemiology of NCDs</p> <p>Sadique, Zia; London School of Hygiene and Tropical Medicine Faculty of Public Health and Policy, Health Services Research and Policy</p> <p>Perel, Pablo; London School of Hygiene and Tropical Medicine Faculty of Epidemiology and Population Health, Centre for Global Chronic Conditions</p> <p>Jobanputra, Kiran; Médecins sans Frontières, Manson Unit</p> <p>Roberts, Bayard; London School of Hygiene and Tropical Medicine Faculty of Public Health and Policy, Centre for Global Chronic Conditions</p> |
| <b>Primary Subject Heading</b>: | Global health                                                                                                                                                                                                                                                                                                                                                                                                                                                                                                                                                                                                                                                                                                                                                                                                                                                                                                                                                                                                                        |
| Secondary Subject Heading:      | Diabetes and endocrinology, Epidemiology, Health economics                                                                                                                                                                                                                                                                                                                                                                                                                                                                                                                                                                                                                                                                                                                                                                                                                                                                                                                                                                           |
| Keywords:                       | Health economics < HEALTH SERVICES ADMINISTRATION & MANAGEMENT, DIABETES & ENDOCRINOLOGY, International health services < HEALTH SERVICES ADMINISTRATION & MANAGEMENT, Epidemiology < TROPICAL MEDICINE, General diabetes < DIABETES & ENDOCRINOLOGY                                                                                                                                                                                                                                                                                                                                                                                                                                                                                                                                                                                                                                                                                                                                                                                 |
|                                 |                                                                                                                                                                                                                                                                                                                                                                                                                                                                                                                                                                                                                                                                                                                                                                                                                                                                                                                                                                                                                                      |

SCHOLARONE™  
Manuscripts

1  
2  
3 1 **Title: Management of diabetes and associated costs in a complex humanitarian setting in the**  
4  
5 2 **Democratic Republic of Congo: a retrospective cohort study.**  
6  
7

8  
9 3 **Corresponding Author:**

10 4 Éimhín Ansbro,

11  
12  
13 5 Formerly: Manson Unit, Médecins sans Frontières, London, United Kingdom

14  
15  
16 6 Currently: London School of Hygiene & Tropical Medicine, Keppel Street, London WC1E 7HT, UK

17  
18 7 Email: [eimhin.ansbro@lshtm.ac.uk](mailto:eimhin.ansbro@lshtm.ac.uk) Tel: +44(0) 207 927 2086  
19

20  
21 8 **Authors:**

- 22  
23  
24 9 1. Éimhín Ansbro, Manson Unit, Médecins sans Frontières, London, United Kingdom; London  
25 School of Hygiene & Tropical Medicine, United Kingdom.  
26 10  
27 11 2. Michel Biringanine, Médecins sans Frontières Operational Centre Amsterdam, Mweso  
28 Hospital, North Kivu, Democratic Republic of Congo  
29 12  
30 13 3. Grazia Caleo, Manson Unit, Médecins sans Frontières, London, United Kingdom  
31  
32 14 4. David Prieto-Merino, Department of Noncommunicable Disease Epidemiology, London  
33 School of Hygiene and Tropical Medicine, London, United Kingdom  
34 15  
35 16 5. Zia Sadique, Department of Health Services Research and Policy, London School of Hygiene  
36 and Tropical Medicine, London, United Kingdom  
37 17  
38 18 6. Pablo Perel, Centre for Global Chronic Conditions, London School of Hygiene and Tropical  
39 Medicine, London, United Kingdom  
40 19  
41 20 7. Kiran Jobanputra, Manson Unit, Médecins sans Frontières, London, United Kingdom  
42  
43 21 8. Bayard Roberts, Centre for Global Chronic Conditions, London School of Hygiene and  
44 Tropical Medicine, London, United Kingdom (Bayard.Roberts@lshtm.ac.uk)  
45  
46 22

47  
48  
49 24 **Word Count: 3999**  
50  
51 25

52 26 **Keywords:** Democratic Republic of Congo, Sub-Saharan Africa, diabetes, hypertension,  
53 27 noncommunicable disease, humanitarian, conflict, care model, management, programme, chronic  
54 28 care, outpatient, hospital care, task shifting, cost, economic.  
55  
56  
57  
58  
59  
60

## 30 **Abstract**

31 **Objective:** We aimed to evaluate an Integrated Diabetic Clinic within a Hospital Outpatient  
32 Department (IDC-OPD) in a complex humanitarian setting in North Kivu, Democratic Republic of  
33 Congo. Specific objectives were to: (i) analyse diabetes intermediate clinical and programmatic  
34 outcomes (blood pressure/glycaemic control, visit volume and frequency); (ii) explore the  
35 association of key insecurity and related programmatic events with these outcomes; and (iii)  
36 describe incremental IDC OPD programme costs.

37 **Design:** Retrospective cohort analysis of routine programmatic data collected from January 2014 -  
38 February 2017; analysis of programme costs for 2014/2015.

39 **Setting:** Outpatient diabetes programme in Mweso hospital, supported by Médecins sans Frontières,  
40 in North Kivu, Demographic Republic of Congo.

41 **Participants:** Diabetes patients attending IDC-OPD.

42 **Outcome measures:** Intermediate clinical and programmatic outcome trends (blood pressure/  
43 glycaemic control; visit volume/frequency); incremental programme costs.

44 **Results:** Of 243 diabetes patients, 44.6% were women, median age was 45 (IQR 32-56); 51.4% were  
45 classified Type 2. On introduction of IDC-OPD, glucose control improved and patient volume and visit  
46 interval increased. During insecurity, control rates were initially maintained by a nurse-provided,  
47 scaled-back service, while patient volume and visit interval decreased. Following service suspension  
48 due to drug stock-outs, patients were less likely to achieve control, improving on service resumption.  
49 Total costs decreased 16% from 2014 (€36,573) to 2015 (€30,861). Annual cost per patient dropped  
50 from €475 in 2014 to €214 in 2015 due to reduced supply costs and increased patient numbers.

51 **Conclusions:** In a chronic conflict setting, we documented that control of diabetes intermediate  
52 outcomes was achievable during stable periods. During insecure periods, a simplified, nurse-led

1  
2  
3 53 model maintained control rates until drug stock-outs occurred. Incremental per patient annual costs  
4  
5 54 were lower than chronic HIV care costs in low-income settings. Future operational research should  
6  
7  
8 55 define a simplified diabetes care package including emergency preparedness.  
9  
10  
11 56

## 13 57 **Strengths and Limitations**

- 16 58 • This is the first study of its kind to examine diabetes intermediate clinical outcomes and  
17 59 programme costs in a complex humanitarian setting in sub-Saharan Africa.
- 19 60 • Using routine clinical and programmatic data collected in a protracted conflict setting, we  
20 61 estimated the effect of insecurity and related programmatic changes on diabetes  
21 62 intermediate clinical outcomes, which to our knowledge, has not been addressed in the  
22 63 literature to date.
- 24 64 • The study was limited by the relatively small sample size and lack of control group for  
25 65 comparison.
- 27 66 • The costing analysis was descriptive and based on aggregate data and so neither the cost-  
28 67 effectiveness of the programme nor patient-level costs could be determined.

30 68  
31  
32  
33  
34  
35  
36  
37  
38  
39  
40  
41  
42  
43  
44  
45  
46  
47  
48  
49  
50  
51  
52  
53  
54  
55  
56  
57  
58  
59  
60

1  
2  
3  
4 69 **Title: Management of diabetes and associated costs in a complex**  
5  
6 70 **humanitarian setting in the Democratic Republic of Congo: a retrospective**  
7  
8  
9 71 **cohort study.**  
10  
11  
12 72  
13  
14  
15

## 16 73 **Background**

17  
18 74 Over the past 40 years, diabetes prevalence has increased sharply worldwide, particularly in low and  
19  
20 75 middle income countries (LMICs).[1] However, data on the burden and needs related to diabetes  
21  
22 76 and other non-communicable diseases (NCDs) are scarce from conflict-affected countries,  
23  
24 77 particularly those in Sub-Saharan Africa.[1,2] Humanitarian actors have been slow to prioritise  
25  
26 78 diabetes treatment in disaster and post-conflict settings despite reporting increasing presentations  
27  
28 79 of diabetic patients within their programmes.[3–6] This is due to lack of knowledge on local diabetes  
29  
30 80 epidemiology, limited research on diabetes management or outcomes in crisis settings; a lack of  
31  
32 81 programmatic and policy guidance or tools to support diabetes care in such settings; prioritisation of  
33  
34 82 other health needs; and also a perception that diabetes care is complex and expensive. [2,3,6–8]  
35  
36  
37  
38

39 83 The humanitarian situation in Democratic Republic of Congo (DRC) is considered one of the most  
40  
41 84 complex and challenging worldwide. Prolonged conflict over two decades has resulted in over 5  
42  
43 85 million deaths, over 4.5 million internally displaced people, the exodus of over 800,000 refugees,  
44  
45 86 and ongoing political and social instability. [9,10] The health system, weakened by prolonged  
46  
47 87 conflict, is challenged by competing health needs in a country ranked 176 of 189 on the human  
48  
49 88 development index despite holding rich natural resources. [11]  
50  
51  
52

53 89 On this backdrop, diabetes prevalence is increasing, currently estimated at 4.0 - 5.4%. [12–14] While  
54  
55 90 some factors implicated in the global rise in diabetes prevalence hold true in DRC (demographic  
56  
57 91 change, urbanisation, changing diets etc.) chronic conflict and political instability add additional  
58  
59  
60



1  
2  
3 92 complexity. Recent reviews and ethnographic evidence point to a link between chronic food  
4  
5 93 insecurity, childhood malnutrition and diabetes. [13,15,16] In DRC, 43% of children under 5 years are  
6  
7 94 chronically malnourished and levels of food insecurity have risen sharply, with millions subsisting on  
8  
9  
10 95 World Food Programme rations. [17] Recent evidence also supports an association between chronic  
11  
12 96 perceived stress and diabetes onset, while patients with diabetes in humanitarian settings focus on  
13  
14 97 suffering and loss as a cause of their illness. [16,18] Furthermore, in humanitarian crises, people with  
15  
16 98 diabetes are at increased risk of complications and death due to treatment interruption and  
17  
18 99 precarious access to food and water. [2,6]  
19  
20  
21  
22 100 Médecins sans Frontières (MSF), a medical humanitarian organisation, has supported healthcare  
23  
24 101 delivery in Mweso, North Kivu, in collaboration with the Ministry of Health since 2008. North Kivu is  
25  
26 102 a rural, impoverished area bordering Rwanda with an estimated population of 365,000. It remains a  
27  
28 103 flash point in the on-going conflict between shifting rebel groups and government forces, which has  
29  
30 104 been characterised by brutal violence against civilians and destruction of lives and livelihoods.  
31  
32  
33 105 Outbreaks of violence since 2016 have resulted in recurrent waves of population displacement;  
34  
35 106 North Kivu alone hosts 17 internally displaced person camps. MSF supports health services in 4 out  
36  
37 107 of 23 Primary Health Care clinics and in Mweso hospital within Masisi District. Mweso hospital  
38  
39 108 serves a catchment area of approximately 145,000 people, with about 65,000 recipients of care  
40  
41 109 living in the immediate vicinity of the hospital.  
42  
43  
44  
45 110 While a national diabetes programme exists in DRC, available diabetes care is concentrated at  
46  
47 111 hospital level in major cities. [19] In response to growing patient and provider needs in Mweso, MSF  
48  
49 112 implemented a hospital-outpatient based diabetes programme in March 2015, the Integrated  
50  
51 113 Diabetic Clinic within Hospital Outpatient Department (IDC-OPD) in place of the ad hoc care  
52  
53 114 previously undertaken. The IDC-OPD was integrated at the clinical level into usual outpatient  
54  
55 115 activities, with pre-existing staff trained to provide this additional service. [20] The programme  
56  
57  
58 116 comprised a nurse-led, multi-disciplinary model, using locally adapted clinical guidelines, patient  
59  
60

1  
2  
3 117 counselling materials and data collection tools, accompanied by three days of specialist training.[21]  
4

5 118 The clinic team included: a nurse supervisor, nursing assistant, two doctors, a nutritionist, and  
6  
7 119 education and psychosocial support officers. Diabetes was diagnosed according to World Health  
8  
9 120 Organization (WHO) guidelines using repeated fasting capillary glucose. Most patients were  
10  
11 121 identified as diabetic and enrolled after acute hospital presentation, while some were identified via  
12  
13 122 the Mweso outpatient department or referring primary care clinics.  
14  
15

16  
17 123 Patients received a detailed enrolment assessment, monthly nurse-led follow-up and 6-monthly  
18  
19 124 medical review. The program included context-adapted dietary advice (accounting for locally  
20  
21 125 available and affordable foods and customs) and psychosocial support, including clinician-moderated  
22  
23 126 peer support groups and involvement of family or friends as treatment supporters. The psychosocial  
24  
25 127 aspects of patients and providers managing diabetes are discussed in a related paper, with major  
26  
27 128 themes from the patient perspective including the difficulty adhering to the recommended diet and  
28  
29 129 barriers to clinic access during outbreaks of violence. [22] Each patient was given a clinic-held  
30  
31 130 patient file and patient-held passport to facilitate safe passage when armed groups impeded their  
32  
33 131 travel. Clinical guidelines were adapted from MSF, WHO and other international guidance. [23]  
34  
35 132 Patient educational tools (disease and diet education leaflets) were adapted from Santé Diabète  
36  
37 133 [24], a Malian Non-Governmental Organisation, and generic medications, included on MSF's  
38  
39 134 Essential Drugs List, were prescribed. Insulin doses were adjusted using single fasting capillary blood  
40  
41 135 glucose readings and patients' reported symptoms of hypo- or hyperglycaemia in the absence of  
42  
43 136 home glucose monitoring. Insulin-dependent patients were prescribed human insulin, delivered via  
44  
45 137 needle and syringe, and advised to store this at home in a clay pot, recommended as a safe  
46  
47 138 alternative to refrigeration in similar contexts. [25]  
48  
49  
50  
51  
52  
53

54 139 In early 2016, outbreaks of armed violence restricted movement of patients and supplies. Direct  
55  
56 140 attacks on MSF staff and facilities, including an armed robbery and abductions, led to withdrawal of  
57  
58 141 the international staff from Mweso and temporary scaling back of the programme, with local nursing  
59  
60

1  
2  
3 142 staff dispensing medications to any patients reaching the clinic. Later, the programme was  
4  
5 143 suspended for a period of six weeks when supply routes were entirely blocked and drug stocks were  
6  
7 144 exhausted.

9  
10 145 A mixed methods evaluation of the Mweso IDC-OPD programme was undertaken by MSF and  
11  
12 146 included a qualitative evaluation exploring patient and provider clinical and psychosocial challenges,  
13  
14 147 presented elsewhere [22]; and a retrospective review of quantitative programmatic data and cost  
15  
16 148 data collected as part of routine care in a chronic conflict zone, reported here. The overall aim of  
17  
18 149 this paper was to evaluate an Integrated Diabetic Clinic within a Hospital Outpatient Department  
19  
20 150 (IDC-OPD) in a complex humanitarian setting in North Kivu in Democratic Republic of Congo. The  
21  
22 151 specific objectives were to: (i) analyse diabetes intermediate clinical and programmatic outcomes  
23  
24 152 (blood pressure/glycaemic control, visit frequency and volume); (ii) explore the association of key  
25  
26 153 insecurity and related programmatic events with these outcomes; and (iii) describe incremental IDC  
27  
28 154 OPD programme costs.

## 33 34 155 **Methods**

35  
36 156 It has been acknowledged that traditional experimental and evaluation methods may be unfeasible,  
37  
38 157 inappropriate or even unethical to apply in humanitarian settings [26]. Therefore, we have used a  
39  
40 158 pragmatic approach to utilising programmatic data, with an open cohort design. For the outcome  
41  
42 159 analysis, we conducted a retrospective analysis of routine data of enrolled adults aged  $\geq 18$  years  
43  
44 160 from January 2014 to February 2017, examining trends in diabetes outcomes and their association  
45  
46 161 with key programmatic events. The study period was divided into five phases, defined by  
47  
48 162 programmatic changes or periods of heightened insecurity (which impacted service delivery due to  
49  
50 163 staff evacuation, supply chain interruption and reduced patient access). Period T1 refers to ad-hoc  
51  
52 164 care delivered before introduction of the IDC-OPD programme (T2). Security incidents in December  
53  
54 165 2015 prompted a period of service suspension (nurse-only care, with drug pick-ups, glucose testing  
55  
56  
57  
58  
59  
60

1  
2  
3 166 and minimal treatment adjustments) (S1). Complete suspension followed once drug stocks were  
4  
5 167 exhausted (S2). Limited service resumed in April (R1) until full service recommenced from  
6  
7 168 September 2016 (R2) (Table 1).  
8  
9

10  
11 169 Table 1. Study Periods for Evaluation of IDC-OPD Programme, Mweso, DRC  
12

| Study Period           | Description                                                                                                             | Dates                      |
|------------------------|-------------------------------------------------------------------------------------------------------------------------|----------------------------|
| <b>Training 1 (T1)</b> | Ad hoc diabetes service following basic staff training                                                                  | 01/01/2014 –<br>14/03/2015 |
| <b>Training 2 (T2)</b> | IDC-OPD implemented following formal staff training                                                                     | 15/03/2015 –<br>14/12/2015 |
| <b>Suspend 1 (S1)</b>  | Nurse-provided care without medical supervision;<br>monthly drug refills provided until buffer stocks were<br>exhausted | 15/12/2015 –<br>31/01/2016 |
| <b>Suspend 2 (S2)</b>  | No clinical supervision or drugs were provided                                                                          | 01/02/2016 –<br>14/04/2016 |
| <b>Resume 1 (R1)</b>   | The service was resumed without medical<br>supervision or quality control                                               | 15/04/2016 –<br>31/08/2016 |
| <b>Resume 2 (R2)</b>   | Full service resumed until end of data collection<br>period                                                             | 01/09/2016 –<br>09/02/2017 |

170

171 **Data**

172 Patients were given a unique identification number on enrolment. Data were recorded in paper-  
173 based clinic-held files by clinical staff and transferred to an electronic database by a trained data  
174 entry operator on a weekly basis. Missing data were discussed with the nurse manager and gaps  
175 were filled during follow-up clinical visits. Single data entry was performed on a password-protected  
176  
177  
178  
179  
180

1  
2  
3 176 Microsoft Excel software application specifically developed by MSF for this programme. Anonymised  
4  
5 177 exports were transferred to the study team on a monthly basis.  
6  
7  
8 178 Demographic data on patients' age, gender, occupation, and village of residence were recorded on  
9  
10 179 enrolment. Cardiovascular risk factors (smoking status, current alcohol use), family history of  
11  
12 180 diabetes, year of diabetes diagnosis and self-reported history of childhood malnutrition and/or  
13  
14 181 tuberculosis were recorded. Clinical parameters: body mass index (BMI), blood pressure (BP)  
15  
16 182 measured by manual sphygmomanometer according to local MSF protocols [21], fasting capillary  
17  
18 183 blood glucose (FBG); prescribed diabetes drugs [insulin and/or oral hypoglycaemic drugs (OHGs)];  
19  
20 184 and diabetes classification (Type I, Type II or other) were recorded at each clinical encounter.  
21  
22 185 Medical review at enrolment and six monthly thereafter was recorded, including biochemical  
23  
24 186 markers (serum creatinine) and examination for complications (visual acuity, cataract, proteinuria,  
25  
26 187 foot check). Numbers of deaths, transfers out of the area and delays in attendance were also  
27  
28 188 documented. The key intermediate clinical outcome and programme measures used in the analysis  
29  
30 189 are shown in Table 2.  
31  
32  
33  
34  
35  
36 190  
37  
38  
39 191 Table 2: Outcome measures used to determine effect of different programme periods on  
40  
41 192 programme delivery and intermediate clinical outcomes  
42  
43

| Category                                  | Variable                                                                                                                                                                                 |
|-------------------------------------------|------------------------------------------------------------------------------------------------------------------------------------------------------------------------------------------|
| <b>Intermediate<br/>Clinical Outcomes</b> | Proportion of visits per month where patients' BP is at target (< 140/90 mmHg)<br><br>Proportion of visits per month where patients' blood glucose is at target (> 4.2 and ≤ 8.3 mmol/L) |
| <b>Number and<br/>frequency of visits</b> | Number of visits per month<br><br>Number of patients seen per month                                                                                                                      |

|  |                                           |
|--|-------------------------------------------|
|  | Average visits per patient per month      |
|  | Average days from previous visit          |
|  | Missing data for BP / glycaemia per visit |

193

194

## 195 Analysis

196 Basic demographics were analysed using mean and median and were presented with inter-quartile  
 197 ranges. We assessed the relationship of different study periods with the frequency of visits and the  
 198 impact of study periods on intermediate clinical outcomes i.e. per visit attainment of blood pressure  
 199 (< 140/90 mmHg) and glycaemic (> 4.2 and ≤ 8.3 mmol/L) targets.

200 To estimate the effect of a period change we calculated the odds ratio (OR) of the odds of having the  
 201 biomarker under control in a visit in the new period ( $t$ ) over the odds of having the biomarker  
 202 controlled in a visit in the previous period ( $t-1$ ):  $OR_t = Odds_t / Odds_{t-1}$ . If  $OR_t > 1$ , this meant that the  
 203 chances of the biomarker being under control in a visit in period  $t$  was greater than the chances of  
 204 the biomarker being under control in a visit in the previous period ( $t-1$ ) (but not necessarily than  
 205 other periods,  $t-2$ ,  $t-3$ , etc.). Likewise,  $OR_t < 1$  implied a reduction in the chances of having the  
 206 biomarker under control in a visit during period  $t$  compared to a visit during the previous period ( $t-1$ ).  
 207 To estimate these OR we ran a logistic model with period as a categorical variable, suitably  
 208 coded, and adjusted for sex, age (and square and cube terms) and number of visits of the patient  
 209 (and square term). The models were stratified by whether the patient was prescribed insulin (+/-  
 210 oral hypoglycaemic agents) at the previous visit.

211 Missing data: Our main analysis used only complete data; records with missing data were excluded.

212 Few outcome variable data were missing: less than 3% in BP control (most of it in the pre-training

1  
2  
3 213 period) and less than 0.3% for glycaemic control (Supplement SM1). There were no missing data for  
4  
5 214 date of visit, sex or age.  
6  
7

8 215

## 10 216 **Costing data and analysis**

11  
12  
13 217 For the descriptive, incremental cost analysis we took a health services perspective. Information  
14  
15 218 related to the nature, location and mode of delivery of the NCD services was collected during a field  
16  
17 219 visit in December 2015 by the study team and was supplemented by informal interviews with clinical  
18  
19 220 and administrative staff. A data analysis tool was designed to collate the relevant financial costs for  
20  
21 221 the study period 2014 -2015 from routine programme documents and standard MSF tools including  
22  
23 222 budget, human resources, drug consumption monitoring, logistics/supply tools, clinic records and  
24  
25 223 programme reports. For salary costs, we included the incremental costs of an MSF-employed  
26  
27 224 medical doctor and nurse and an MOH-employed nurse (with salary supplement paid by MSF)  
28  
29 225 dedicating one day, two psychosocial workers dedicating one hour and a nutritionist dedicating 30  
30  
31 226 minutes per week to the IDC-OPD service (based on 22 working days per month). Hence, most costs  
32  
33 227 were related to drugs, equipment, disposables and stationary. Key cost items were grouped into: (a)  
34  
35 228 medicine, (b) supplies, and (c) staff time. Monthly resource use and unit cost data were recorded  
36  
37 229 and annualised (Supplement SM2); annual total cost, cost per visit and cost per patient were  
38  
39 230 reported in Euro (€) for 2014 before formal implementation of the IDC-OPD programme and for  
40  
41 231 2015 during full implementation.  
42  
43  
44  
45  
46

47 232 The study was approved by the Ministry of Health of North Kivu Province, DRC, and the Médecins  
48  
49 233 sans Frontières Ethics Review Board (ID 1542).  
50  
51

## 52 234 **Patient and Public Involvement**

53  
54  
55 235 Patients were not involved in the design or conduct of this study.  
56  
57

## 58 236 **Results**

1  
2  
3 237 Between January 1<sup>st</sup> 2014 and February 9<sup>th</sup> 2017, 243 patients were enrolled in the IDC-OPD  
4  
5 238 programme (Supplement SM3). Median age was 45 years (IQR 32 – 56); 44.6% of the cohort was  
6  
7 239 female. For adults  $\geq 18$  years ( $n=219$ ), mean BMI was 21.3 kg/m<sup>2</sup> and 31.1% were underweight (BMI  
8  
9 240  $< 18.5$  kg/m<sup>2</sup>). On enrolment, 8.2% were current smokers; 24.4% reported recent alcohol intake;  
10  
11 241 self-reported medical history included: 9.1% hypertension, 2.2 % CVD, 2.7% tuberculosis and 8.7%  
12  
13 242 malnutrition. Half were classified clinically as Type 2 diabetic (51%;  $n=125$ ); 26% ( $n=62$ ) as Type 1;  
14  
15 243 and 23% ( $n=56$ ) were either unclassified or classed as “other” (Supplement SM3).

### 19 244 **Trends in outcomes and impact of programmatic events**

20  
21  
22 245 Numbers of visits and appointment intervals increased after the introduction of the systematic  
23  
24 246 approach to diabetes care, which included monthly review appointments for stable patients (T2)  
25  
26 247 (Figure 1; Supplement SM4). During the period of scaled back service (S1), visit numbers initially  
27  
28 248 climbed while the visit interval decreased, which may reflect increased visit frequency due to short-  
29  
30 249 term drug supplies. Once drug buffer stock was exhausted, visit numbers dropped off sharply.  
31  
32 250 Patients may have avoided or were prevented from attending due to security conditions.  
33  
34  
35  
36  
37  
38  
39  
40  
41  
42  
43  
44  
45  
46  
47  
48  
49  
50  
51  
52  
53  
54  
55  
56  
57  
58  
59  
60

252 Figure 1: Average number of days from previous visit per month for Mwesio IDC-OPD service

253  
254 BP control was consistently better than glycaemic control (of note, patients without diagnosed  
255 hypertension were included in the analysis) (Figure 2). By period T2, approximately 80% of visits  
256 achieved BP and 60% achieved glycaemic control. There was a notable drop in control of both  
257 parameters during programme suspension with a gradual improvement on resumption. Blood  
258 pressure control was consistently better, while glycaemic control was consistently worse, in patients  
259 prescribed insulin (+/- OHGs) compared with those prescribed OHGs alone (Supplement SM5), which



1  
2  
3 260 may be because the former group contained relatively young Type 1 and malnutrition-related  
4  
5 261 diabetics.  
6  
7

8 262  
9

10 263 Figure 2: Proportion of visits with BP or glycaemia at target by month, Mwesio IDC-OPD service  
11  
12

13 264  
14  
15

16 265 The results of the odds ratio (OR) calculations were unexpected. Odds of attaining BP control  
17  
18 266 appeared to worsen following implementation of the formal IDC-OPD programme (T2 vs. T1), while  
19  
20 267 odds of attaining glucose control improved, perhaps because care was initially focussed on glucose  
21  
22 268 control (Supplement SM6). On scaling back the service (S1), control of both parameters seemed to  
23  
24 269 improve, possibly because the service itself or the subset of patients reaching it during the insecure  
25  
26 270 period were somehow different. Once medications supplies were exhausted (S2), control of both  
27  
28 271 parameters seemed to worsen, but control was regained on service resumption. Stratifying by  
29  
30 272 insulin prescription showed similar results (Supplement SM5).  
31  
32

### 33 273 **Costs of providing diabetes care**

34  
35

36  
37 274 The total costs of diabetes care in 2014 and 2015 were approximately €37,000 and €31,000  
38  
39 275 respectively (Table 3). Supplies were the major driver of costs each year. The greatest costs in 2014  
40  
41 276 were for latex gloves, glucometers and glucometer strips; in 2015 they were for glucometers, strips  
42  
43 277 and lancets (Supplement SM2). While medication costs increased in 2015 relative to 2014, staff costs  
44  
45 278 remained unchanged, and total costs decreased, largely driven by reduced excess consumption of  
46  
47 279 latex gloves after it was identified during the IDP-OPD training sessions. The total number of patients  
48  
49 280 and number of visits increased significantly from 2014 to 2015, rising from 77 and 626 to 144 and  
50  
51 281 1103, respectively. Thus, cost per-patient per-year (PPPY) dropped from €475 to €214 and cost per-  
52  
53 282 visit was halved from €58 to €28. This was due to the combined effect of higher patient numbers,  
54  
55 283 greater total number of visits and lower supply costs in 2015 compared to 2014 (Supplement SM2).  
56  
57  
58  
59  
60

284

285 Table 3. Costs (€) of diabetes care in 2014 and 2015, Mwesio IDC-OPD service

| Cost category            | 2014          | % 2014 costs | 2015          | % 2015 costs |
|--------------------------|---------------|--------------|---------------|--------------|
| Medicine costs           | 5,202         | 14%          | 7,746         | 25%          |
| Supply costs             | 25,435        | 70%          | 17,180        | 56%          |
| Staff costs              | 5,935         | 16%          | 5,935         | 19%          |
| <b>Total costs</b>       | <b>36,573</b> | <b>100%</b>  | <b>30,861</b> | <b>100%</b>  |
| <b>Costs per visit</b>   | <b>58</b>     |              | <b>28</b>     |              |
| <b>Costs per patient</b> | <b>475</b>    |              | <b>214</b>    |              |

286

287

288 **Discussion**

289 This evaluation of a chronic disease programme in a complex conflict setting, using routine  
 290 programmatic and cost data, provided lessons, which may improve clinical care and programme  
 291 design. To the best of our knowledge, the influence of treatment interruption and insecurity on  
 292 diabetes management in humanitarian settings has not been addressed in the literature. Similarly,  
 293 we are not aware of costing studies of diabetes care in crisis settings.

294 Our results show that glycaemic control was similar or better to that documented in other  
 295 humanitarian or low-income settings (using different targets) and, while it was positively impacted  
 296 by programmatic changes, control clearly deteriorated during periods of heightened insecurity.[27]

297 Our findings also indicate that, in a population previously undergoing regular supervision, a  
 298 simplified nurse-provided, algorithm-driven service with consistent medication supply may be as

1  
2  
3 299 effective as close medical supervision in maintaining disease control, particularly during periods of  
4  
5 300 service interruption. Medical input could thus be focused on achieving glycaemic control in patients  
6  
7 301 prescribed insulin, who appeared most affected by service interruption. We also note the lack of  
8  
9 302 evidence supporting management of what we believed to be malnutrition-related diabetes.  
10  
11  
12 303 Intermittent outbreaks of armed conflict limited patient access and disrupted supply chains,  
13  
14 304 impeding continuity of care. We suggest that in high-insecurity settings, chronic disease  
15  
16 305 programmes should focus on preparing patients, staff and supply chains to pre-empt treatment  
17  
18 306 interruption during insecure periods, learning from HIV programme experiences in similar  
19  
20 307 settings.[28] Preparation could include: triaging patients by vulnerability (e.g. prioritising insulin-  
21  
22 308 dependent diabetic patients, those with established complications and/or living far from the facility);  
23  
24 309 enhancing patients' health literacy and self-management education and provision of patient-held  
25  
26 310 personal treatment plans and emergency kits (including several months' supply of medications, such  
27  
28 311 as insulin, delivery devices and guidance as appropriate) to facilitate self-care during insecure  
29  
30 312 periods; building staff capacity to allow for flexibility of roles in crises; establishing networks with  
31  
32 313 other chronic disease programmes; and stockpiling and secure storage of medications.[5,28,29]  
33  
34 314 Technology could facilitate continued patient treatment support when access to facilities is  
35  
36 315 impossible e.g. via mobile phone SMS messaging or decentralisation of care to community-based  
37  
38 316 health workers furnished with clinical decision support tools or supported via telemedicine.  
39  
40  
41  
42 317 The relatively poorer glycaemic control in insulin-prescribed patients may reflect either disease  
43  
44 318 severity or the challenges associated with insulin therapy. Adherence to daily insulin injections is  
45  
46 319 difficult anywhere; in Mweso, the security, financial and geographical barriers to accessing insulin  
47  
48 320 and the unavailability, unaffordability and burden for families of the recommended diabetes diet,  
49  
50 321 may additionally contribute to poor adherence.[22] In this programme, clinicians adjusted insulin  
51  
52 322 doses based on a single fasting glucose reading taken in clinic and on patients' reported symptoms in  
53  
54  
55  
56  
57  
58  
59  
60

1  
2  
3 323 the absence of home glucose monitoring and, therefore, dose adjustment was cautious and  
4  
5 324 treatment targets were conservative.  
6  
7  
8 325 There is limited, although growing, evidence on the incidence, prevalence and characterisation of  
9  
10 326 diabetes in Sub-Saharan Africa, which our findings broadly reflect.[30] Several reviews and recent  
11  
12 327 ethnographic evidence describe “atypical” forms of diabetes, which may complicate diagnosis,  
13  
14 328 classification and management. These include “*ketosis-prone atypical diabetes mellitus*” and  
15  
16 329 “*malnutrition-related diabetes*”. [13,16,31] Local prevalence studies support the existence of the  
17  
18 330 latter in the DRC, which is in keeping with the high proportion of underweight adults and  
19  
20 331 “unclassified” diabetics in our cohort.[14,32] It is unclear whether malnutrition is causative,  
21  
22 332 associated with hyperglycaemia or with pancreatic insufficiency and further study of diabetes  
23  
24 333 epidemiology in DRC is needed, exploring factors such as childhood malnutrition, food insecurity and  
25  
26 334 underweight and use of calorie-dense therapeutic foods. [31] Moreover, little evidence exists to  
27  
28 335 guide either malnutrition-related diabetes care or the effective management of insulin in  
29  
30 336 humanitarian settings, particularly in the absence of home or community-based glucose testing.[3,7]  
31  
32  
33 337 The total cost of care delivery decreased by 16% from 2014 to 2015 despite increased visit and  
34  
35 338 patient numbers. This was largely due to decreased supply costs, driven by the 100-fold reduction in  
36  
37 339 consumption of latex gloves following IDC-OPD training. Efficiencies of supply consumption and  
38  
39 340 patient throughput (more visits and more patients seen by the same number of staff) contributed to  
40  
41 341 reducing PPPY costs by 55% from €475 in 2014 to €214 in 2015.  
42  
43  
44 342 To our knowledge, there is no available literature to compare cost per patient or per visit for  
45  
46 343 diabetes care (or NCD care generally) delivered in unstable humanitarian settings. A study from  
47  
48 344 Ghana reported a per patient annual direct cost of US\$372.65 for hospital-delivered diabetes care in  
49  
50 345 2005. For a potential comparator, we looked at the cost of delivering chronic care for HIV, the main  
51  
52 346 life-long condition with which humanitarian actors have traditionally engaged. The 2015 PPPY cost  
53  
54 347 reported in this study is far lower than that reported by PEPFAR and others to deliver chronic HIV  
55  
56  
57  
58  
59  
60

1  
2  
3 348 care programmes in low and middle income countries in SSA [33,34]. In terms of cost structure,  
4  
5 349 supplies were the major cost driver in the Ghanaian study (syringes, lancets and strips), whereas  
6  
7  
8 350 other analyses of diabetes care in SSA identified medications, and specifically insulin, as the main  
9  
10 351 cost contributor [35,36].  
11

## 12 352 **Strengths and Limitations**

13  
14  
15 353 Using routine clinical and programmatic data, with minimal service disruption, we have explored  
16  
17 354 clinical outcomes of a chronic disease programme in a protracted conflict setting and the influence  
18  
19  
20 355 of periods of heightened insecurity on intermediate clinical outcomes and on service delivery. Each  
21  
22 356 patient who attended in a given month contributed data, irrespective of whether they ever  
23  
24 357 experienced a treatment interruption. Our study provides new costing information for humanitarian  
25  
26 358 actors to support the initiation or adaptation of specific NCD programmes and may potentially  
27  
28 359 support scale up of similar services in DRC (and other conflict-affected settings). We concluded that  
29  
30 360 the incremental cost of adding an outpatient diabetes service to a humanitarian health programme  
31  
32 361 in a rural hospital setting may be achieved at a cost similar to that of delivering chronic HIV  
33  
34 362 programmes. While we cannot confirm whether an external audit of cost data had taken place, we  
35  
36 363 are confident in the quality of these data due to MSF's robust systems and oversight by strong in-  
37  
38 364 country and international teams.  
39  
40  
41  
42

43 365 Given the logistical and ethical challenges of undertaking research in conflict settings, we  
44  
45 366 acknowledge that there are a number of study limitations. We had a relatively small sample size and  
46  
47 367 no control group for comparison. We did not explore per patient control of clinical parameters over  
48  
49 368 time, control by diabetes type (or age), appropriateness of prescribing, patient-reported outcomes  
50  
51 369 or the influence of psychosocial factors, diet, or adherence in each study phase since these data  
52  
53 370 were unavailable. Gestational diabetes was not addressed since this was managed within antenatal  
54  
55 371 services. Our costing analysis was descriptive so we could not comment on programme cost-  
56  
57 372 effectiveness. Costing data were presented as average annual costs and did not explore the impact  
58  
59  
60

1  
2  
3 373 of various programme periods on costs. Since our cost data were aggregate, we could not explore  
4  
5 374 patient-level costs or account for patient heterogeneity. While our findings may not be generalizable  
6  
7 375 to other complex humanitarian settings or to other providers' diabetes programmes in the DRC, our  
8  
9 376 study contributes knowledge on key challenges and suggests solutions, which may be more broadly  
10  
11  
12 377 applicable.

13  
14  
15 378 Future research is needed in complex humanitarian settings to evaluate simplified, task-shared  
16  
17 379 models of diabetes care, including culturally- and contextually-relevant psychosocial support and  
18  
19 380 dietary advice; to optimise insulin management; and to evaluate emergency preparedness plans and  
20  
21 381 technology-facilitated remote patient support.[3,5,8,13,29] We recommend that future prospective  
22  
23 382 studies should explore per-patient outcomes (while also exploring programme-level outcomes as  
24  
25 383 done in this study). We suggest including a control group; collecting additional outcome variables,  
26  
27 384 such as complication rates and patient-reported outcomes e.g. related to quality-of-life, including  
28  
29 385 functionality and mental health; and exploring the impact of psychosocial stressors and treatment  
30  
31 386 interruption on clinical outcomes. We also suggest that cost-effectiveness studies of different  
32  
33 387 models of diabetes care, including use of technology-facilitated remote support, and patient level  
34  
35 388 costing studies from both provider and patient perspectives should be undertaken, exploring patient  
36  
37 389 heterogeneity and direct and indirect patient costs.

## 390 **Conclusion**

391 Our results help develop the sparse knowledge on the prevalence and characterisation of diabetes in  
392 Sub-Saharan Africa. They demonstrate that diabetes care is feasible even in complex humanitarian  
393 emergencies, and at a cost that is lower than chronic HIV care. The results also indicate that the  
394 Mweso IDC-OPD programme could be further simplified to involve drug collection along with nurse-  
395 led, algorithm-guided treatment adjustment. We suggest that chronic disease programmes in  
396 unstable settings should engage in emergency preparedness, learning from the experience of HIV

1  
2  
3 397 programmes in similar settings. Future research is needed to evaluate simplified, task-shared models  
4  
5 398 of diabetes care and management; and to evaluate emergency preparedness plans and technology-  
6  
7 399 facilitated remote patient support.  
8  
9

10  
11 400  
12  
13

## 14 401 **List of Abbreviations**

|        |         |                                                                  |
|--------|---------|------------------------------------------------------------------|
| 17 402 | BMI     | Body Mass Index                                                  |
| 18     |         |                                                                  |
| 19 403 | BP      | Blood Pressure                                                   |
| 20     |         |                                                                  |
| 21 404 | DM      | Diabetes Mellitus                                                |
| 22     |         |                                                                  |
| 23     |         |                                                                  |
| 24 405 | DRC     | Democratic Republic of Congo                                     |
| 25     |         |                                                                  |
| 26 406 | HIV     | Human Immunodeficiency Virus                                     |
| 27     |         |                                                                  |
| 28 407 | IDC-OPD | Integrated Diabetic Clinic within Hospital Outpatient Department |
| 29     |         |                                                                  |
| 30     |         |                                                                  |
| 31 408 | LMICs   | Low- and Middle-Income Countries                                 |
| 32     |         |                                                                  |
| 33 409 | MSF     | Médecins sans Frontières                                         |
| 34     |         |                                                                  |
| 35 410 | NCD     | Noncommunicable Disease                                          |
| 36     |         |                                                                  |
| 37 411 | OHG     | Oral Hypoglycaemic Drugs                                         |
| 38     |         |                                                                  |
| 39 412 | OR      | Odds Ratio                                                       |
| 40     |         |                                                                  |
| 41     |         |                                                                  |
| 42 413 | PPPY    | Per Patient Per Year                                             |
| 43     |         |                                                                  |

44 414

45  
46 415  
47  
48

49 416  
50  
51  
52  
53  
54  
55  
56  
57  
58  
59  
60

1  
2  
3 417 **Declarations**  
4  
5

6  
7 418 ***Ethics approval and consent to participate***  
8  
9

10 419 This study was approved by the Ministry of Health of North Kivu Province, DRC, by the MSF Ethics  
11  
12 420 Review Board, and the Ethics Committee of the London School of Hygiene and Tropical Medicine.  
13  
14 421 Information sheets on the clinic walls provided details of the evaluation; no specific consent was  
15  
16 422 sought from patients for use of their routine clinical data.  
17  
18  
19

20 423 ***Authors' contributions***  
21  
22

23  
24 424 KJ and BR were involved in study conception; EA, GC, KJ, DPM, PP and BR contributed to study  
25  
26 425 design and interpretation of data. DPM and ZS analysed the data. MB contributed to data collection.  
27  
28 426 EA drafted the manuscript and all authors reviewed drafts and approved the final version.  
29  
30

31 427 **Acknowledgements**  
32  
33

34 428 We gratefully acknowledge the staff and patients of the MSF IDC-OPD programme for their  
35  
36 429 contribution to this study. We thank Sarah Venis for her helpful review of the article. This work was  
37  
38 430 presented at MSF Scientific Days Conference in London, May 2018.  
39  
40

41 431 **Competing Interests**  
42  
43

44 432 The authors declare that they have no competing interests.  
45  
46

47 433 **Data Sharing**  
48  
49

50 434 The datasets are available from MSF on request by researchers who fulfil certain criteria and under  
51  
52 435 the auspices of a data sharing agreement.  
53  
54

55 436 **Funding**  
56  
57

58 437 This study was funded by Médecins sans Frontières.  
59  
60



438 **References**

- 439 1 NCD Risk Factor Collaboration (NCD-RisC). Worldwide trends in diabetes since 1980: a pooled  
440 analysis of 751 population-based studies with 4.4 million participants. *Lancet (London, England)* 2016;**387**:1513–30. doi:10.1016/S0140-6736(16)00618-8
- 442 2 Kehlenbrink S, Smith J, Ansbro É, *et al.* The burden of diabetes and use of diabetes care in  
443 humanitarian crises in low-income and middle-income countries. *Lancet Diabetes Endocrinol*  
444 2019;**0**. doi:10.1016/S2213-8587(19)30082-8
- 445 3 Demaio A, Jamieson J, Horn R, *et al.* Non-Communicable Diseases in Emergencies: A Call to  
446 Action. *PLoS Curr* Published Online First: 2013.  
447 doi:10.1371/currents.dis.53e08b951d59ff913ab8b9bb51c4d0de
- 448 4 Roberts B, Patel P, McKee M. Noncommunicable diseases and post-conflict countries. *Bull*  
449 *World Health Organ* 2011;**90**:2-2A. doi:10.2471/BLT.11.098863
- 450 5 Besançon S, Fall I-S, Doré M, *et al.* Diabetes in an emergency context: the Malian case study.  
451 *Confl Health* 2015;**9**:15. doi:10.1186/s13031-015-0042-9
- 452 6 Boulle P, Kehlenbrink S, Smith J, *et al.* Challenges associated with providing diabetes care in  
453 humanitarian settings. *Lancet Diabetes Endocrinol* 2019;**0**. doi:10.1016/S2213-  
454 8587(19)30083-X
- 455 7 Ruby A, Knight A, Perel P, *et al.* The Effectiveness of Interventions for Non-Communicable  
456 Diseases in Humanitarian Crises: A Systematic Review. *PLoS One* 2015;**10**:e0138303.  
457 doi:10.1371/journal.pone.0138303
- 458 8 Jobanputra K, Boulle P, Roberts B, *et al.* Three Steps to Improve Management of  
459 Noncommunicable Diseases in Humanitarian Crises. *PLOS Med* 2016;**13**:e1002180.  
460 doi:10.1371/journal.pmed.1002180

- 1  
2  
3 461 9 International Rescue Committee. Mortality in the Democratic Republic of Congo: An ongoing  
4  
5 462 crisis | International Rescue Committee (IRC). 2007.  
6  
7 463 <https://www.rescue.org/report/mortality-democratic-republic-congo-ongoing-crisis>  
8  
9 (accessed 10 Dec 2017).  
10 464  
11  
12 465 10 UNHCR - UNHCR Global Trends 2018. Geneva.  
13  
14 466 2019.[https://www.unhcr.org/uk/statistics/unhcrstats/5d08d7ee7/unhcr-global-trends-](https://www.unhcr.org/uk/statistics/unhcrstats/5d08d7ee7/unhcr-global-trends-2018.html)  
15  
16 467 2018.html (accessed 1 Jul 2019).  
17  
18  
19 468 11 Human Development Indices and Indicators: 2018 Statistical Update Congo (Democratic  
20  
21 469 Republic of the). <http://hdr.undp.org/en/data> (accessed 30 Jul 2019).  
22  
23  
24 470 12 Whiting DR, Guariguata L, Weil C, *et al*. IDF diabetes atlas: global estimates of the prevalence  
25  
26 471 of diabetes for 2011 and 2030. *Diabetes Res Clin Pract* 2011;**94**:311–21.  
27  
28 472 doi:10.1016/j.diabres.2011.10.029  
29  
30  
31 473 13 Atun R, Davies JI, Gale EAM, *et al*. Diabetes in sub-Saharan Africa: from clinical care to health  
32  
33 474 policy. *lancet Diabetes Endocrinol* 2017;**5**:622–67. doi:10.1016/S2213-8587(17)30181-X  
34  
35  
36 475 14 Muyer MT, Muls E, Mapatano MA, *et al*. Diabetes and intermediate hyperglycaemia in  
37  
38 476 Kisantu, DR Congo: a cross-sectional prevalence study. *BMJ Open* 2012;**2**:e001911.  
39  
40 477 doi:10.1136/bmjopen-2012-001911  
41  
42  
43 478 15 A sub-Saharan African perspective of diabetes.  
44  
45 479 file:///C:/Users/DAnsbro/Downloads/0f317533c181fe640b000000.pdf (accessed 30 Jan  
46  
47 480 2015).  
48  
49  
50  
51 481 16 Carruth L, Mendenhall E. “Wasting away”: Diabetes, food insecurity, and medical insecurity in  
52  
53 482 the Somali Region of Ethiopia. *Soc Sci Med* 2019;**228**:155–63.  
54  
55 483 doi:10.1016/J.SOCSCIMED.2019.03.026  
56  
57  
58  
59  
60

- 1  
2  
3 484 17 Food and Agriculture Organisation of the United Nations. FAO - News Article: Food insecurity  
4  
5 485 soars in conflict-ridden Democratic Republic of Congo.  
6  
7 486 <http://www.fao.org/news/story/en/item/1028934/icode/> (accessed 5 Aug 2019).  
8  
9  
10 487 18 Harris ML, Oldmeadow C, Hure A, *et al.* Stress increases the risk of type 2 diabetes onset in  
11  
12 488 women: A 12-year longitudinal study using causal modelling. *PLoS One* 2017;**12**:e0172126.  
13  
14 489 doi:10.1371/journal.pone.0172126  
15  
16  
17 490 19 World diabetes Foundation. Projects. Improving diabetes care WDF05-128.  
18  
19 491 <https://www.worlddiabetesfoundation.org/projects/congo-kinshasa-wdf05-128> (accessed 5  
20  
21 492 Aug 2019).  
22  
23  
24 493 20 Valentijn PP, Schepman SM, Opheij W, *et al.* Understanding integrated care: a comprehensive  
25  
26 494 conceptual framework based on the integrative functions of primary care. *Int J Integr Care*  
27  
28 495 2013;**13**:e010. doi:10.5334/ijic.886  
29  
30  
31 496 21 Ansbro ÉM. MSF OCA Mweso Guide de diabète pour patients ambulatoires. 2015.  
32  
33  
34 497 22 Murphy A, Biringanine M, Roberts B, *et al.* Diabetes care in a complex humanitarian  
35  
36 498 emergency setting: a qualitative evaluation. *BMC Health Serv Res* 2017;**17**:431.  
37  
38 499 doi:<https://dx.doi.org/10.1186/s12913-017-2362-5>  
39  
40  
41  
42 500 23 Jobanputra K, Ansbro E. Diabetes service evaluation (2014-2017) – main findings from  
43  
44 501 Mweso, North Kivu, the Democratic Republic of Congo. Published Online First:  
45  
46 502 2018.<https://fieldresearch.msf.org/handle/10144/619307> (accessed 12 May 2019).  
47  
48  
49  
50 503 24 ONG Santé Diabète / NGO Health Diabetes - Home. <https://santediabete.org/en/> (accessed  
51  
52 504 20 Aug 2018).  
53  
54  
55 505 25 Ogle GD, Abdullah M, Mason D, *et al.* Insulin storage in hot climates without refrigeration:  
56  
57 506 temperature reduction efficacy of clay pots and other techniques. *Diabet Med* 2016;**33**:1544–  
58  
59  
60

- 1  
2  
3 507 53. doi:10.1111/dme.13194  
4  
5  
6 508 26 Blanchet K, Ramesh A, Frison S, *et al.* Evidence on public health interventions in humanitarian  
7  
8 509 crises. *Lancet (London, England)* 2017;**390**:2287–96. doi:10.1016/S0140-6736(16)30768-1  
9  
10  
11 510 27 Cohen DB, Allain TJ, Glover S, *et al.* A survey of the management, control, and complications  
12  
13 511 of diabetes mellitus in patients attending a diabetes clinic in Blantyre, Malawi, an area of high  
14  
15 512 HIV prevalence. *Am J Trop Med Hyg* 2010;**83**:575–81. doi:10.4269/ajtmh.2010.10-0104  
16  
17  
18 513 28 Culbert H, Tu D, O'Brien DP, *et al.* HIV Treatment in a Conflict Setting: Outcomes and  
19  
20 514 Experiences from Bukavu, Democratic Republic of the Congo. *PLoS Med* 2007;**4**:e129.  
21  
22 515 doi:10.1371/journal.pmed.0040129  
23  
24  
25  
26 516 29 Slama S, Kim H-J, Roglic G, *et al.* Care of non-communicable diseases in emergencies. *Lancet*  
27  
28 517 (*London, England*) 2017;**389**:326–30. doi:10.1016/S0140-6736(16)31404-0  
29  
30  
31 518 30 Hall V, Thomsen RW, Henriksen O, *et al.* Diabetes in Sub Saharan Africa 1999-2011:  
32  
33 519 Epidemiology and public health implications. a systematic review. *BMC Public Health*  
34  
35 520 2011;**11**:564. doi:10.1186/1471-2458-11-564  
36  
37  
38 521 31 Gill G V., Mbanya J-C, Ramaiya KL, *et al.* A sub-Saharan African perspective of diabetes.  
39  
40 522 *Diabetologia* 2009;**52**:8–16. doi:10.1007/s00125-008-1167-9  
41  
42  
43 523 32 Hightower JD, Hightower CM, Vázquez BYS, *et al.* Incident prediabetes/diabetes and blood  
44  
45 524 pressure in urban and rural communities in the Democratic Republic of Congo. *Vasc Health*  
46  
47 525 *Risk Manag* 2011;**7**:483–9. doi:10.2147/VHRM.S22707  
48  
49  
50  
51 526 33 Bikilla A, Jerene D, Robberstad B, *et al.* Cost estimates of HIV care and treatment with and  
52  
53 527 without anti-retroviral therapy at Arba Minch Hospital in southern Ethiopia. *Cost Eff Resour*  
54  
55 528 *Alloc* 2009;**7**:6. doi:10.1186/1478-7547-7-6  
56  
57  
58 529 34 2013 Report on Costs of Treatment in the President's Emergency Plan for AIDS Relief  
59  
60

- 1  
2  
3 530 (PEPFAR) Background. <https://www.pepfar.gov/documents/organization/212059.pdf>  
4  
5 531 (accessed 21 Dec 2017).  
6  
7  
8 532 35 Quaye EA, Amporful EO, Akweongo P, *et al*. Analysis of the Financial Cost of Diabetes Mellitus  
9  
10 533 in Four Cocoa Clinics of Ghana. *Value Heal Reg Issues* 2015;**7**:49–53.  
11  
12 534 doi:10.1016/j.vhri.2015.08.005  
13  
14  
15 535 36 Kirigia JM, Sambo HB, Sambo LG, *et al*. Economic burden of diabetes mellitus in the WHO  
16  
17 536 African region. *BMC Int Health Hum Rights* 2009;**9**:6. doi:10.1186/1472-698X-9-6  
18  
19  
20  
21  
22  
23  
24  
25  
26  
27  
28  
29  
30  
31  
32  
33  
34  
35  
36  
37  
38  
39  
40  
41  
42  
43  
44  
45  
46  
47  
48  
49  
50  
51  
52  
53  
54  
55  
56  
57  
58  
59  
60



Figure 1: Average number of days from previous visit per month for Mweso IDC-OPD service

615x436mm (72 x 72 DPI)

1  
2  
3  
4  
5  
6  
7  
8  
9  
10  
11  
12  
13  
14  
15  
16  
17  
18  
19  
20  
21  
22  
23  
24  
25  
26  
27  
28  
29  
30  
31  
32  
33  
34  
35  
36  
37  
38  
39  
40  
41  
42  
43  
44  
45  
46  
47  
48  
49  
50  
51  
52  
53  
54  
55  
56  
57  
58  
59  
60



Figure 2: Proportion of visits with BP or glycaemia at target by month, Mweso IDC-OPD service  
809x558mm (72 x 72 DPI)

SM1. Proportion of visits with missing data for either blood pressure or glycaemia measurements, IDC-OPD Programme, Mweso, DRC

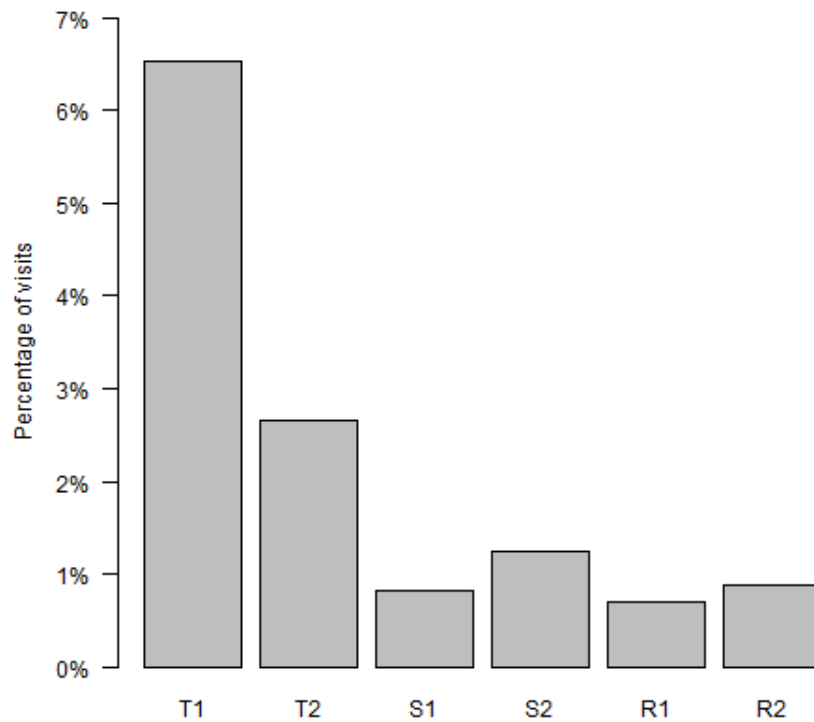

Note: Definitions of study periods T1 – R2 are described in Table 1



## SM2. Monthly resource use associated with IDC-OPD in Mweso Hospital, North Kivu,

## DRC

| Items                                                        | Unit cost (€) | Forecast monthly consumption |        |
|--------------------------------------------------------------|---------------|------------------------------|--------|
|                                                              |               | 2014                         | 2015   |
| <b>Medicine</b>                                              |               |                              |        |
| INSULIN ISOPHANE (NPH), human, 100 UI/ml, 10 ml, vial        | 6.300         | 40                           | 40     |
| INSULIN RAPID, human, 100 IU/ml, 10 ml, vial                 | 6.300         | 8                            | 8      |
| INSULIN, 100IU/ml, BIPHASIC 30, human, 10ml, vial            | 13.610        | 10                           | 10     |
| METFORMIN hydrochloride, 500 mg, tab.                        | 0.014         | 5,300                        | 12,000 |
| GLIBENCLAMIDE, 5 mg, tab.                                    | 0.005         | 750                          | 3,600  |
| HYDROCHLOROTHIAZIDE, 50 mg, tab.                             | 0.003         | 0                            | 300    |
| GLUCOSE HYPERTONIC, 50%, 50 ml, vial                         | 0.556         | 75                           | 6      |
| AMITRIPTYLINE hydrochloride, 25 mg, tab.                     | 0.006         | 200                          | 750    |
| ACETYLSALICYLIC acid (aspirin), 75 mg, tab.                  | 0.005         | 0                            | 2,000  |
| AMLODIPINE 5mg, tabs.                                        | 0.018         | 0                            | 300    |
| <b>Supplies</b>                                              |               |                              |        |
| GLUCOMETER, blood glucose monitor (Nova StatStrip) + strips  | 96.705        | 5                            | 10     |
| (glucometer Nova StatStrip) STRIP ref. 42214                 | 0.230         | 2,000                        | 4,000  |
| SYRINGE, s.u., Luer, insulin, 100 IU/1 ml + fixed needle     | 0.079         | 2,000                        | 4,000  |
| (spectrophotometer) KIT, DOSAGE CREATININE, Liquicolor 200ml | 4.830         | 3.5                          | 3.5    |
| THERMOMETER, ELECTRONIC, accuracy 0.1§ C + case              | 1.110         | 20                           | 3      |
| SPHYGMOMANOMETER, one-hand manometer, Velcro, adult          | 26.000        | 0                            | 1      |
| TEST, URINE, pH,dens,prot,gluc,ket,blood,nit,leuc, 1 strip   | 0.197         | 100                          | 200    |
| REUSABLE SHARPS CONTAINER (RSC), 1.2 litre                   | 44.750        | 1                            | 1      |
| CONTAINER, SAMPLE, plast., 60ml, non sterile, urine          | 0.083         | 1,700                        | 200    |
| LANCET, s.u., sterile, standard point                        | 0.006         | 900                          | 4,000  |
| GLOVE, EXAMINATION, latex, s.u. non sterile, medium          | 0.025         | 50,000                       | 500    |
| <b>Staff time (days allocated to diabetes care)*</b>         |               |                              |        |
| MSF Medical doctor                                           | 1,350         | 4                            | 4      |
| MSF Nurse                                                    | 900           | 4                            | 4      |
| BCZ Nurse                                                    | 239           | 4                            | 4      |
| MSF psychosocial worker                                      | 1,422         | 0.5                          | 0.5    |
| 1 Nutritionist (MSF)                                         | 864           | 0.25                         | 0.25   |

\*Note: Staff time costs assumed 22 full-time working days per month.

## SM3. Baseline characteristics of 243 patients on enrolment into Mweso IDC-OPD service

| Variable               | Total | (%)     | DM-1 | (%)     | DM-2 | (%)     | Other/NA | (%)            |
|------------------------|-------|---------|------|---------|------|---------|----------|----------------|
| <b>Patients (N)</b>    | 243   |         | 62   |         | 125  |         | 56       |                |
| <b>Age</b>             |       |         |      |         |      |         |          |                |
| <18                    | 24    | (9.9%)  | 19   | (30.6%) | 0    | (0.0%)  | 5        | <b>(8.9%)</b>  |
| 18-40                  | 74    | (30.5%) | 39   | (62.9%) | 20   | (16.0%) | 15       | <b>(26.8%)</b> |
| 41-60                  | 112   | (46.1%) | 3    | (4.8%)  | 80   | (64.0%) | 29       | <b>(51.8%)</b> |
| >60                    | 33    | (13.6%) | 1    | (1.6%)  | 25   | (20.0%) | 7        | <b>(12.5%)</b> |
| <b>Sex</b>             |       |         |      |         |      |         |          |                |
| Male                   | 134   | (55.1%) | 34   | (54.8%) | 70   | (56.0%) | 30       | <b>(53.6%)</b> |
| Female                 | 108   | (44.4%) | 28   | (45.2%) | 55   | (44.0%) | 25       | <b>(44.6%)</b> |
| No data                | 1     | (0.4%)  | 0    | (0.0%)  | 0    | (0.0%)  | 1        | <b>(1.8%)</b>  |
| <b>Occupation</b>      |       |         |      |         |      |         |          |                |
| Labourer               | 121   | (49.8%) | 29   | (46.8%) | 85   | (68.0%) | 7        | <b>(12.5%)</b> |
| Office worker          | 19    | (7.8%)  | 2    | (3.2%)  | 11   | (8.8%)  | 6        | <b>(10.7%)</b> |
| Student                | 8     | (3.3%)  | 8    | (12.9%) | 0    | (0.0%)  | 0        | <b>(0.0%)</b>  |
| Unable to work         | 11    | (4.5%)  | 7    | (11.3%) | 3    | (2.4%)  | 1        | <b>(1.8%)</b>  |
| Other                  | 48    | (19.8%) | 15   | (24.2%) | 26   | (20.8%) | 7        | <b>(12.5%)</b> |
| No data                | 36    | (14.8%) | 1    | (1.6%)  | 0    | (0.0%)  | 35       | <b>(62.5%)</b> |
| <b>Medical History</b> |       |         |      |         |      |         |          |                |
| <b>CVD</b>             |       |         |      |         |      |         |          |                |
| Yes                    | 5     | (2.1%)  | 1    | (1.6%)  | 3    | (2.4%)  | 1        | <b>(1.8%)</b>  |
| No data                | 24    | (9.9%)  | 0    | (0.0%)  | 0    | (0.0%)  | 24       | <b>(42.9%)</b> |
| <b>Hypertension</b>    |       |         |      |         |      |         |          |                |
| Yes                    | 20    | (8.2%)  | 0    | (0.0%)  | 18   | (14.4%) | 2        | <b>(3.6%)</b>  |
| No data                | 25    | (10.3%) | 0    | (0.0%)  | 1    | (0.8%)  | 24       | <b>(42.9%)</b> |
| <b>Tuberculosis</b>    |       |         |      |         |      |         |          |                |
| Yes                    | 6     | (2.5%)  | 1    | (1.6%)  | 5    | (4.0%)  | 0        | <b>(0.0%)</b>  |
| No data                | 24    | (9.9%)  | 0    | (0.0%)  | 0    | (0.0%)  | 24       | <b>(42.9%)</b> |
| <b>Malnutrition</b>    |       |         |      |         |      |         |          |                |
| Yes                    | 19    | (7.8%)  | 15   | (24.2%) | 2    | (1.6%)  | 2        | <b>(3.6%)</b>  |
| No data                | 24    | (9.9%)  | 0    | (0.0%)  | 0    | (0.0%)  | 24       | <b>(42.9%)</b> |
| <b>Family Hx of DM</b> |       |         |      |         |      |         |          |                |
| Yes                    | 35    | (14.4%) | 6    | (9.7%)  | 23   | (18.4%) | 6        | <b>(10.7%)</b> |
| No data                | 24    | (9.9%)  | 0    | (0.0%)  | 0    | (0.0%)  | 24       | <b>(42.9%)</b> |

| <b>Patients &gt;=18 years(N)*</b> | 219        | 43         | 125        | 51         |
|-----------------------------------|------------|------------|------------|------------|
| <b>Smoking</b>                    |            |            |            |            |
| Yes                               | 18 (8.2%)  | 1 (2.3%)   | 16 (12.8%) | 1 (2.0%)   |
| No data                           | 21 (9.6%)  | 0 (0.0%)   | 0 (0.0%)   | 21 (41.2%) |
| <b>Alcohol</b>                    |            |            |            |            |
| Yes                               | 50 (22.8%) | 12 (27.9%) | 32 (25.6%) | 6 (11.8%)  |
| No data                           | 33 (15.1%) | 0 (0.0%)   | 1 (0.8%)   | 32 (62.7%) |
| <b>BMI</b>                        |            |            |            |            |
| <18.5                             | 68 (31.1%) | 23 (53.5%) | 34 (27.2%) | 11 (21.6%) |
| 18.5-24.9                         | 96 (43.8%) | 15 (34.9%) | 59 (47.2%) | 22 (43.1%) |
| 25.0-29.9                         | 41 (18.7%) | 5 (11.6%)  | 27 (21.6%) | 9 (17.6%)  |
| >=30                              | 7 (3.2%)   | 0 (0.0%)   | 5 (4.0%)   | 2 (3.9%)   |
| No data                           | 7 (3.2%)   | 0 (0.0%)   | 0 (0.0%)   | 7 (13.7%)  |

Note: For smoking, alcohol and BMI, denominators included only patients aged 18 years or above.

1  
2  
3  
4  
5  
6  
7  
8  
9  
10  
11  
12  
13  
14  
15  
16  
17  
18  
19  
20  
21  
22  
23  
24  
25  
26  
27  
28  
29  
30  
31  
32  
33  
34  
35  
36  
37  
38  
39  
40  
41  
42  
43  
44  
45  
46  
47  
48  
49  
50  
51  
52  
53  
54  
55  
56  
57  
58  
59  
60

For peer review only

1  
2  
3  
4  
5  
6  
7  
8  
9  
10  
11  
12  
13  
14  
15  
16  
17  
18  
19  
20  
21  
22  
23  
24  
25  
26  
27  
28  
29  
30  
31  
32  
33  
34  
35  
36  
37  
38  
39  
40  
41  
42  
43  
44  
45  
46  
47  
48  
49  
50  
51  
52  
53  
54  
55  
56  
57  
58  
59  
60

For peer review only

SM4. Average days' delay in attendance since planned appointment per month of

IDC-OPD service, Mweso, DRC



Review only

SM5. Proportion of visits at target for BP and glycaemic control, stratified by insulin prescription per month of IDC-OPD service, Mweso, DRC

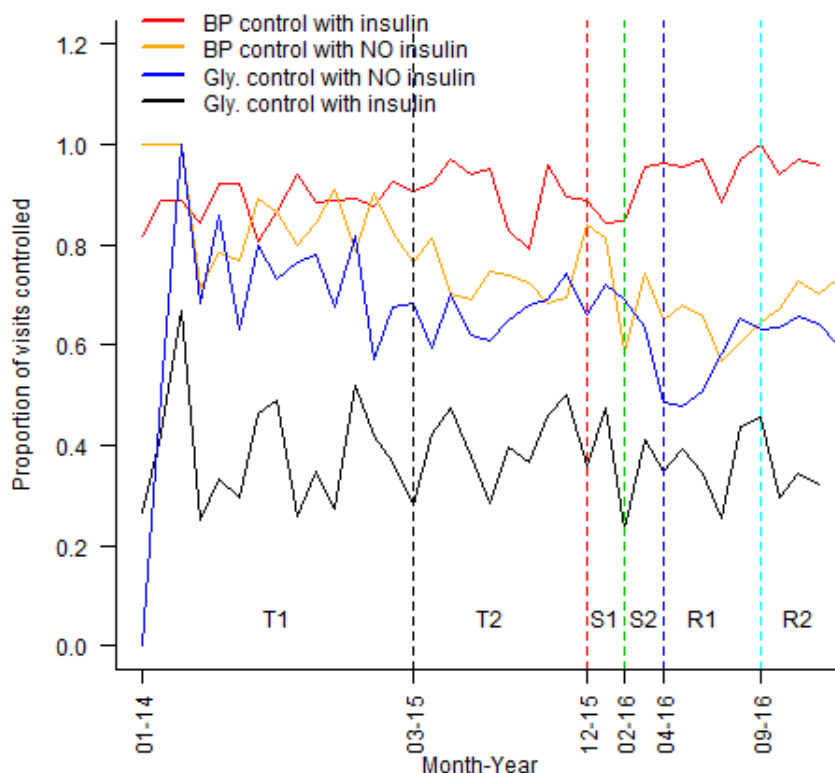

Note: Patients were categorised by whether they were prescribed insulin [+/- oral hypoglycaemic (OHG) drugs] or OHG drugs alone at their last recorded visit. The former group would have included Type 1 diabetics, Type 2 diabetics with more advanced illness requiring a combination of OHG and insulin, and those with an intermediate type of diabetes, presenting with high insulin requirements in the absence of diabetic ketoacidosis, which we postulated represented “malnutrition-related diabetes”. The latter group were likely to include Type 2 diabetics.

SM6. Impact (OR) on BP and glycaemic control of study period over previous period, unstratified (A) and stratified by insulin prescription (B and C) per month of IDC-OPD service, Mweso, DRC

A. Impact (OR) on BP and glycaemia in all patients (not stratified by insulin prescription)

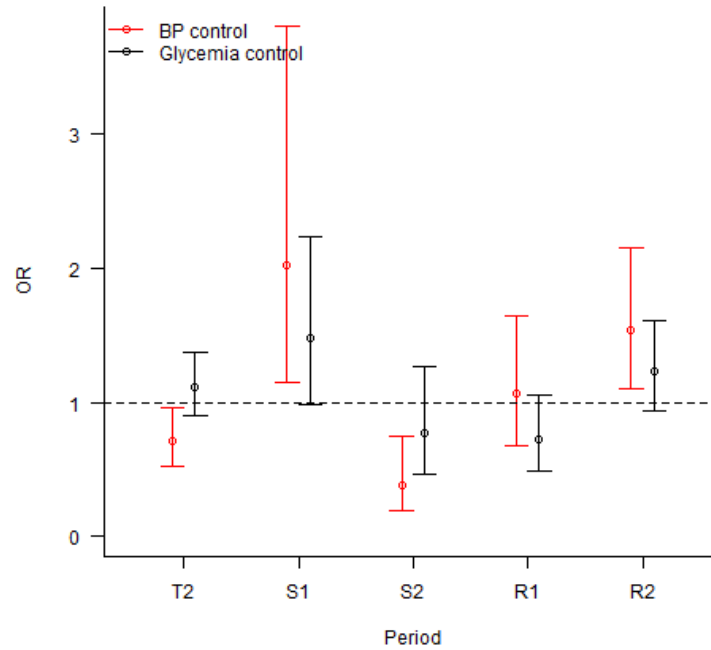

B. Impact (OR) on BP and glycaemia in patients on oral hypoglycaemic drugs only

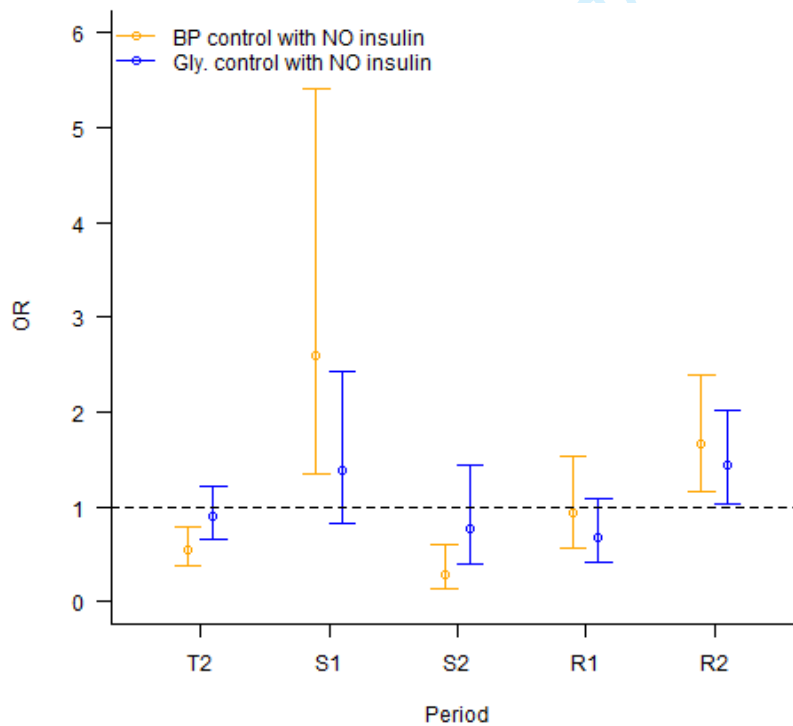



C. Impact (OR) on BP and glycaemia in patients prescribed insulin (+/- OHG)



Review only

STROBE Statement—Checklist of items that should be included in reports of *cross-sectional studies*

**Study Title: Management of diabetes and associated costs in a complex humanitarian setting in the Democratic Republic of Congo: a retrospective cohort study.**

|                              | Item No | Recommendation                                                                                                                                                                                    | Page No      |
|------------------------------|---------|---------------------------------------------------------------------------------------------------------------------------------------------------------------------------------------------------|--------------|
| <b>Title and abstract</b>    | 1       | (a) Indicate the study's design with a commonly used term in the title or the abstract                                                                                                            | 1,4          |
|                              |         | (b) Provide in the abstract an informative and balanced summary of what was done and what was found                                                                                               | 2-3          |
| <b>Introduction</b>          |         |                                                                                                                                                                                                   |              |
| Background/rationale         | 2       | Explain the scientific background and rationale for the investigation being reported                                                                                                              | 4-7          |
| Objectives                   | 3       | State specific objectives, including any prespecified hypotheses                                                                                                                                  | 7            |
| <b>Methods</b>               |         |                                                                                                                                                                                                   |              |
| Study design                 | 4       | Present key elements of study design early in the paper                                                                                                                                           | 7-11         |
| Setting                      | 5       | Describe the setting, locations, and relevant dates, including periods of recruitment, exposure, follow-up, and data collection                                                                   | 4,5,7, 8, 11 |
| Participants                 | 6       | (a) Give the eligibility criteria, and the sources and methods of selection of participants                                                                                                       | 7            |
| Variables                    | 7       | Clearly define all outcomes, exposures, predictors, potential confounders, and effect modifiers. Give diagnostic criteria, if applicable                                                          | 6,9,10       |
| Data sources/<br>measurement | 8*      | For each variable of interest, give sources of data and details of methods of assessment (measurement). Describe comparability of assessment methods if there is more than one group              | 6            |
| Bias                         | 9       | Describe any efforts to address potential sources of bias                                                                                                                                         | n/a          |
| Study size                   | 10      | Explain how the study size was arrived at                                                                                                                                                         | 7            |
| Quantitative variables       | 11      | Explain how quantitative variables were handled in the analyses. If applicable, describe which groupings were chosen and why                                                                      | 10           |
| Statistical methods          | 12      | (a) Describe all statistical methods, including those used to control for confounding                                                                                                             | 10           |
|                              |         | (b) Describe any methods used to examine subgroups and interactions                                                                                                                               | 10           |
|                              |         | (c) Explain how missing data were addressed                                                                                                                                                       | 10,11        |
|                              |         | (d) If applicable, describe analytical methods taking account of sampling strategy                                                                                                                | 10           |
|                              |         | (e) Describe any sensitivity analyses                                                                                                                                                             | n/a          |
| <b>Results</b>               |         |                                                                                                                                                                                                   |              |
| Participants                 | 13*     | (a) Report numbers of individuals at each stage of study—eg numbers potentially eligible, examined for eligibility, confirmed eligible, included in the study, completing follow-up, and analysed | 10           |
|                              |         | (b) Give reasons for non-participation at each stage                                                                                                                                              | n/a          |
|                              |         | (c) Consider use of a flow diagram                                                                                                                                                                | n/a          |
| Descriptive data             | 14*     | (a) Give characteristics of study participants (eg demographic, clinical, social) and information on exposures and potential confounders                                                          | Supp Mat 3   |
|                              |         | (b) Indicate number of participants with missing data for each variable of interest                                                                                                               | Supp Mat 1   |
| Outcome data                 | 15*     | Report numbers of outcome events or summary measures                                                                                                                                              | 9,10         |

|    |                          |    |                                                                                                                                                                                                              |
|----|--------------------------|----|--------------------------------------------------------------------------------------------------------------------------------------------------------------------------------------------------------------|
| 1  |                          |    |                                                                                                                                                                                                              |
| 2  | Main results             | 16 | (a) Give unadjusted estimates and, if applicable, confounder-adjusted estimates and their precision (eg, 95% confidence interval). Make clear which confounders were adjusted for and why they were included |
| 3  |                          |    | n/a                                                                                                                                                                                                          |
| 4  |                          |    |                                                                                                                                                                                                              |
| 5  |                          |    |                                                                                                                                                                                                              |
| 6  |                          |    | (b) Report category boundaries when continuous variables were categorized                                                                                                                                    |
| 7  |                          |    | Supp                                                                                                                                                                                                         |
| 8  |                          |    | Mat 3                                                                                                                                                                                                        |
| 9  |                          |    |                                                                                                                                                                                                              |
| 10 |                          |    | (c) If relevant, consider translating estimates of relative risk into absolute risk for a meaningful time period                                                                                             |
| 11 | Other analyses           | 17 | Report other analyses done—eg analyses of subgroups and interactions, and sensitivity analyses                                                                                                               |
| 12 |                          |    | n/a                                                                                                                                                                                                          |
| 13 |                          |    |                                                                                                                                                                                                              |
| 14 | <b>Discussion</b>        |    |                                                                                                                                                                                                              |
| 15 | Key results              | 18 | Summarise key results with reference to study objectives                                                                                                                                                     |
| 16 | Limitations              | 19 | Discuss limitations of the study, taking into account sources of potential bias or imprecision. Discuss both direction and magnitude of any potential bias                                                   |
| 17 |                          |    | 12-14                                                                                                                                                                                                        |
| 18 |                          |    | 17,18                                                                                                                                                                                                        |
| 19 |                          |    |                                                                                                                                                                                                              |
| 20 | Interpretation           | 20 | Give a cautious overall interpretation of results considering objectives, limitations, multiplicity of analyses, results from similar studies, and other relevant evidence                                   |
| 21 |                          |    | 14-16                                                                                                                                                                                                        |
| 22 |                          |    |                                                                                                                                                                                                              |
| 23 |                          |    |                                                                                                                                                                                                              |
| 24 | Generalisability         | 21 | Discuss the generalisability (external validity) of the study results                                                                                                                                        |
| 25 |                          |    | 18                                                                                                                                                                                                           |
| 26 | <b>Other information</b> |    |                                                                                                                                                                                                              |
| 27 | Funding                  | 22 | Give the source of funding and the role of the funders for the present study and, if applicable, for the original study on which the present article is based                                                |
| 28 |                          |    | 20                                                                                                                                                                                                           |
| 29 |                          |    |                                                                                                                                                                                                              |
| 30 |                          |    |                                                                                                                                                                                                              |

\*Give information separately for exposed and unexposed groups.

**Note:** An Explanation and Elaboration article discusses each checklist item and gives methodological background and published examples of transparent reporting. The STROBE checklist is best used in conjunction with this article (freely available on the Web sites of PLoS Medicine at <http://www.plosmedicine.org/>, Annals of Internal Medicine at <http://www.annals.org/>, and Epidemiology at <http://www.epidem.com/>). Information on the STROBE Initiative is available at [www.strobe-statement.org](http://www.strobe-statement.org).
