# Supplementary material for: Management of diabetes and associated costs in a complex humanitarian setting in the Democratic Republic of Congo: a retrospective cohort study
Source: PubMed Central journal article supplement — BMJ Open. 2019 Nov 24;9(11):e030176. doi: 10.1136/bmjopen-2019-030176 (PMC6887084; doi:10.1136/bmjopen-2019-030176), 2019-11-24
Supplement: bmjopen-2019-030176supp001.pdf [file bmjopen-2019-030176supp001.pdf]

SM1. Proportion of visits with missing data for either blood pressure or glycaemia measurements, IDC-OPD Programme, Mweso, DRC

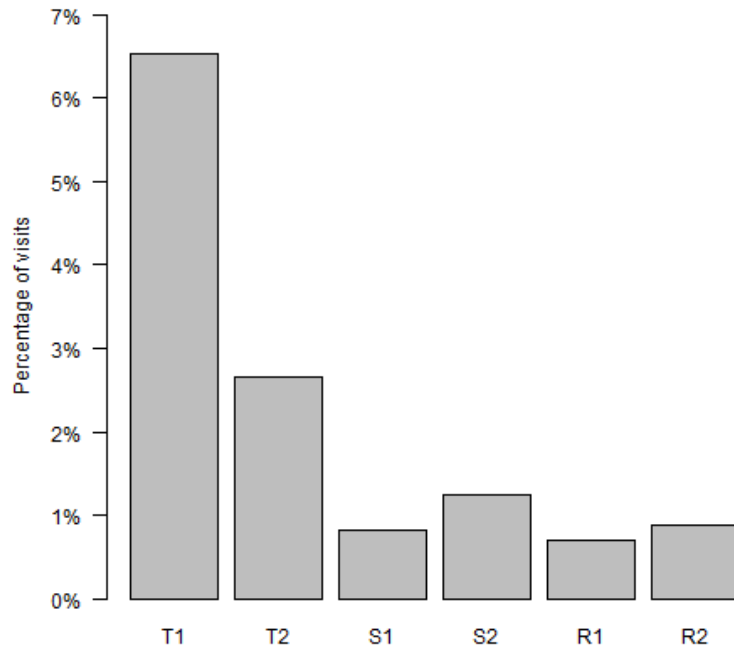

Note: Definitions of study periods T1 – R2 are described in Table 1
