# Supplementary material for: Management of diabetes and associated costs in a complex humanitarian setting in the Democratic Republic of Congo: a retrospective cohort study
Source: PubMed Central journal article supplement — BMJ Open. 2019 Nov 24;9(11):e030176. doi: 10.1136/bmjopen-2019-030176 (PMC6887084; doi:10.1136/bmjopen-2019-030176), 2019-11-24
Supplement: bmjopen-2019-030176supp002.pdf [file bmjopen-2019-030176supp002.pdf]

## SM2. Monthly resource use associated with IDC-OPD in Mweso Hospital, North Kivu,

## DRC

| Items                                                        | Unit cost (€) | Forecast monthly consumption |        |
|--------------------------------------------------------------|---------------|------------------------------|--------|
|                                                              |               | 2014                         | 2015   |
| <b>Medicine</b>                                              |               |                              |        |
| INSULIN ISOPHANE (NPH), human, 100 UI/ml, 10 ml, vial        | 6.300         | 40                           | 40     |
| INSULIN RAPID, human, 100 IU/ml, 10 ml, vial                 | 6.300         | 8                            | 8      |
| INSULIN, 100IU/ml, BIPHASIC 30, human, 10ml, vial            | 13.610        | 10                           | 10     |
| METFORMIN hydrochloride, 500 mg, tab.                        | 0.014         | 5,300                        | 12,000 |
| GLIBENCLAMIDE, 5 mg, tab.                                    | 0.005         | 750                          | 3,600  |
| HYDROCHLOROTHIAZIDE, 50 mg, tab.                             | 0.003         | 0                            | 300    |
| GLUCOSE HYPERTONIC, 50%, 50 ml, vial                         | 0.556         | 75                           | 6      |
| AMITRIPTYLINE hydrochloride, 25 mg, tab.                     | 0.006         | 200                          | 750    |
| ACETYLSALICYLIC acid (aspirin), 75 mg, tab.                  | 0.005         | 0                            | 2,000  |
| AMLODIPINE 5mg, tabs.                                        | 0.018         | 0                            | 300    |
| <b>Supplies</b>                                              |               |                              |        |
| GLUCOMETER, blood glucose monitor (Nova StatStrip) + strips  | 96.705        | 5                            | 10     |
| (glucometer Nova StatStrip) STRIP ref. 42214                 | 0.230         | 2,000                        | 4,000  |
| SYRINGE, s.u., Luer, insulin, 100 IU/1 ml + fixed needle     | 0.079         | 2,000                        | 4,000  |
| (spectrophotometer) KIT, DOSAGE CREATININE, Liquicolor 200ml | 4.830         | 3.5                          | 3.5    |
| THERMOMETER, ELECTRONIC, accuracy 0.1\$ C + case             | 1.110         | 20                           | 3      |
| SPHYGMOMANOMETER, one-hand manometer, Velcro, adult          | 26.000        | 0                            | 1      |
| TEST, URINE, pH,dens,prot,gluc,ket,blood,nit,leuc, 1 strip   | 0.197         | 100                          | 200    |
| REUSABLE SHARPS CONTAINER (RSC), 1.2 litre                   | 44.750        | 1                            | 1      |
| CONTAINER, SAMPLE, plast., 60ml, non sterile, urine          | 0.083         | 1,700                        | 200    |
| LANCET, s.u., sterile, standard point                        | 0.006         | 900                          | 4,000  |
| GLOVE, EXAMINATION, latex, s.u. non sterile, medium          | 0.025         | 50,000                       | 500    |
| <b>Staff time (days allocated to diabetes care)*</b>         |               |                              |        |
| MSF Medical doctor                                           | 1,350         | 4                            | 4      |
| MSF Nurse                                                    | 900           | 4                            | 4      |
| BCZ Nurse                                                    | 239           | 4                            | 4      |
| MSF psychosocial worker                                      | 1,422         | 0.5                          | 0.5    |
| 1 Nutritionist (MSF)                                         | 864           | 0.25                         | 0.25   |

\*Note: Staff time costs assumed 22 full-time working days per month.
