# Supplementary material for: Management of diabetes and associated costs in a complex humanitarian setting in the Democratic Republic of Congo: a retrospective cohort study
Source: PubMed Central journal article supplement — BMJ Open. 2019 Nov 24;9(11):e030176. doi: 10.1136/bmjopen-2019-030176 (PMC6887084; doi:10.1136/bmjopen-2019-030176), 2019-11-24
Supplement: bmjopen-2019-030176supp003.pdf [file bmjopen-2019-030176supp003.pdf]

## SM3. Baseline characteristics of 243 patients on enrolment into Mwesio IDC-OPD service

| Variable               | Total | (%)     | DM-1 | (%)     | DM-2 | (%)     | Other/NA | (%)            |
|------------------------|-------|---------|------|---------|------|---------|----------|----------------|
| <b>Patients (N)</b>    | 243   |         | 62   |         | 125  |         | 56       |                |
| <b>Age</b>             |       |         |      |         |      |         |          |                |
| <18                    | 24    | (9.9%)  | 19   | (30.6%) | 0    | (0.0%)  | 5        | <b>(8.9%)</b>  |
| 18-40                  | 74    | (30.5%) | 39   | (62.9%) | 20   | (16.0%) | 15       | <b>(26.8%)</b> |
| 41-60                  | 112   | (46.1%) | 3    | (4.8%)  | 80   | (64.0%) | 29       | <b>(51.8%)</b> |
| >60                    | 33    | (13.6%) | 1    | (1.6%)  | 25   | (20.0%) | 7        | <b>(12.5%)</b> |
| <b>Sex</b>             |       |         |      |         |      |         |          |                |
| Male                   | 134   | (55.1%) | 34   | (54.8%) | 70   | (56.0%) | 30       | <b>(53.6%)</b> |
| Female                 | 108   | (44.4%) | 28   | (45.2%) | 55   | (44.0%) | 25       | <b>(44.6%)</b> |
| No data                | 1     | (0.4%)  | 0    | (0.0%)  | 0    | (0.0%)  | 1        | <b>(1.8%)</b>  |
| <b>Occupation</b>      |       |         |      |         |      |         |          |                |
| Labourer               | 121   | (49.8%) | 29   | (46.8%) | 85   | (68.0%) | 7        | <b>(12.5%)</b> |
| Office worker          | 19    | (7.8%)  | 2    | (3.2%)  | 11   | (8.8%)  | 6        | <b>(10.7%)</b> |
| Student                | 8     | (3.3%)  | 8    | (12.9%) | 0    | (0.0%)  | 0        | <b>(0.0%)</b>  |
| Unable to work         | 11    | (4.5%)  | 7    | (11.3%) | 3    | (2.4%)  | 1        | <b>(1.8%)</b>  |
| Other                  | 48    | (19.8%) | 15   | (24.2%) | 26   | (20.8%) | 7        | <b>(12.5%)</b> |
| No data                | 36    | (14.8%) | 1    | (1.6%)  | 0    | (0.0%)  | 35       | <b>(62.5%)</b> |
| <b>Medical History</b> |       |         |      |         |      |         |          |                |
| <b>CVD</b>             |       |         |      |         |      |         |          |                |
| Yes                    | 5     | (2.1%)  | 1    | (1.6%)  | 3    | (2.4%)  | 1        | <b>(1.8%)</b>  |
| No data                | 24    | (9.9%)  | 0    | (0.0%)  | 0    | (0.0%)  | 24       | <b>(42.9%)</b> |
| <b>Hypertension</b>    |       |         |      |         |      |         |          |                |
| Yes                    | 20    | (8.2%)  | 0    | (0.0%)  | 18   | (14.4%) | 2        | <b>(3.6%)</b>  |
| No data                | 25    | (10.3%) | 0    | (0.0%)  | 1    | (0.8%)  | 24       | <b>(42.9%)</b> |
| <b>Tuberculosis</b>    |       |         |      |         |      |         |          |                |
| Yes                    | 6     | (2.5%)  | 1    | (1.6%)  | 5    | (4.0%)  | 0        | <b>(0.0%)</b>  |
| No data                | 24    | (9.9%)  | 0    | (0.0%)  | 0    | (0.0%)  | 24       | <b>(42.9%)</b> |
| <b>Malnutrition</b>    |       |         |      |         |      |         |          |                |
| Yes                    | 19    | (7.8%)  | 15   | (24.2%) | 2    | (1.6%)  | 2        | <b>(3.6%)</b>  |
| No data                | 24    | (9.9%)  | 0    | (0.0%)  | 0    | (0.0%)  | 24       | <b>(42.9%)</b> |
| <b>Family Hx of DM</b> |       |         |      |         |      |         |          |                |
| Yes                    | 35    | (14.4%) | 6    | (9.7%)  | 23   | (18.4%) | 6        | <b>(10.7%)</b> |
| No data                | 24    | (9.9%)  | 0    | (0.0%)  | 0    | (0.0%)  | 24       | <b>(42.9%)</b> |

| <b>Patients &gt;=18 years(N)*</b> | 219 |         | 43 |         | 125 |         | 51 |                |
|-----------------------------------|-----|---------|----|---------|-----|---------|----|----------------|
| <b>Smoking</b>                    |     |         |    |         |     |         |    |                |
| Yes                               | 18  | (8.2%)  | 1  | (2.3%)  | 16  | (12.8%) | 1  | <b>(2.0%)</b>  |
| No data                           | 21  | (9.6%)  | 0  | (0.0%)  | 0   | (0.0%)  | 21 | <b>(41.2%)</b> |
| <b>Alcohol</b>                    |     |         |    |         |     |         |    |                |
| Yes                               | 50  | (22.8%) | 12 | (27.9%) | 32  | (25.6%) | 6  | <b>(11.8%)</b> |
| No data                           | 33  | (15.1%) | 0  | (0.0%)  | 1   | (0.8%)  | 32 | <b>(62.7%)</b> |
| <b>BMI</b>                        |     |         |    |         |     |         |    |                |
| <18.5                             | 68  | (31.1%) | 23 | (53.5%) | 34  | (27.2%) | 11 | <b>(21.6%)</b> |
| 18.5-24.9                         | 96  | (43.8%) | 15 | (34.9%) | 59  | (47.2%) | 22 | <b>(43.1%)</b> |
| 25.0-29.9                         | 41  | (18.7%) | 5  | (11.6%) | 27  | (21.6%) | 9  | <b>(17.6%)</b> |
| >=30                              | 7   | (3.2%)  | 0  | (0.0%)  | 5   | (4.0%)  | 2  | <b>(3.9%)</b>  |
| No data                           | 7   | (3.2%)  | 0  | (0.0%)  | 0   | (0.0%)  | 7  | (13.7%)        |

Note: For smoking, alcohol and BMI, denominators included only patients aged 18 years or above.
