# Supplementary material for: Management of diabetes and associated costs in a complex humanitarian setting in the Democratic Republic of Congo: a retrospective cohort study
Source: PubMed Central journal article supplement — BMJ Open. 2019 Nov 24;9(11):e030176. doi: 10.1136/bmjopen-2019-030176 (PMC6887084; doi:10.1136/bmjopen-2019-030176), 2019-11-24

SM4. Average days' delay in attendance since planned appointment per month of  
IDC-OPD service, Mweso, DRC

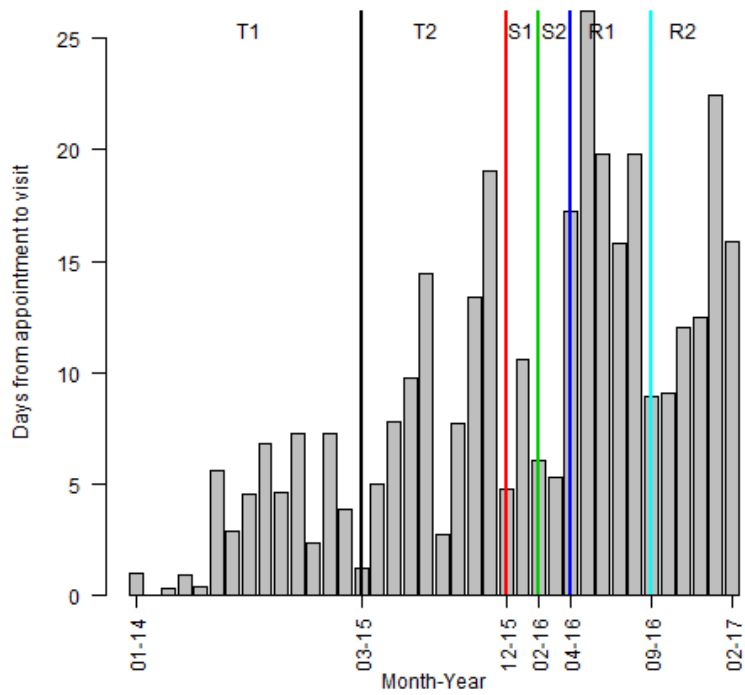

Supplement: bmjopen-2019-030176supp004.pdf [file bmjopen-2019-030176supp004.pdf]
