# Supplementary material for: Management of diabetes and associated costs in a complex humanitarian setting in the Democratic Republic of Congo: a retrospective cohort study
Source: PubMed Central journal article supplement — BMJ Open. 2019 Nov 24;9(11):e030176. doi: 10.1136/bmjopen-2019-030176 (PMC6887084; doi:10.1136/bmjopen-2019-030176), 2019-11-24
Supplement: bmjopen-2019-030176supp005.pdf [file bmjopen-2019-030176supp005.pdf]

SM5. Proportion of visits at target for BP and glycaemic control, stratified by insulin prescription per month of IDC-OPD service, Mweso, DRC

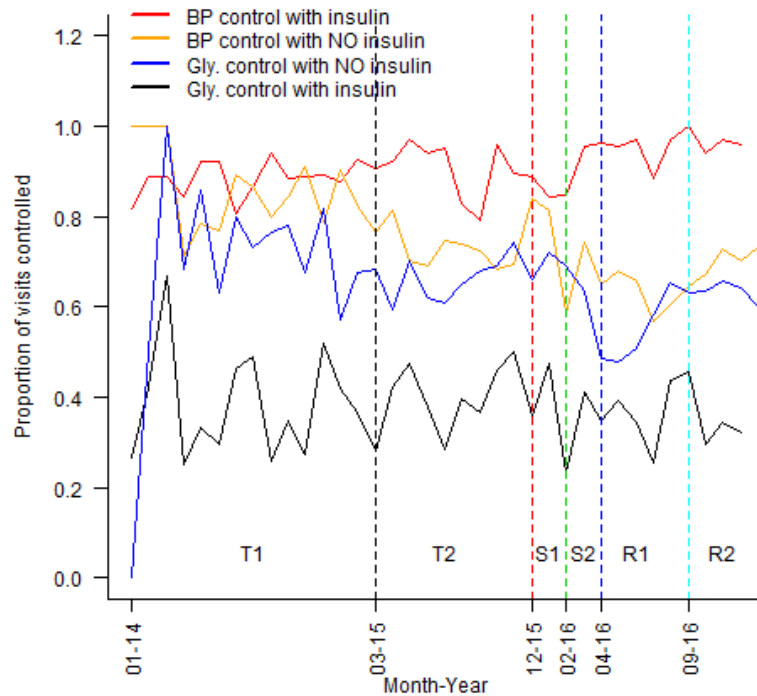

Note: Patients were categorised by whether they were prescribed insulin [+/- oral hypoglycaemic (OHG) drugs] or OHG drugs alone at their last recorded visit. The former group would have included Type 1 diabetics, Type 2 diabetics with more advanced illness requiring a combination of OHG and insulin, and those with an intermediate type of diabetes, presenting with high insulin requirements in the absence of diabetic ketoacidosis, which we postulated represented “malnutrition-related diabetes”. The latter group were likely to include Type 2 diabetics.
