# Supplementary material for: Management of diabetes and associated costs in a complex humanitarian setting in the Democratic Republic of Congo: a retrospective cohort study
Source: PubMed Central journal article supplement — BMJ Open. 2019 Nov 24;9(11):e030176. doi: 10.1136/bmjopen-2019-030176 (PMC6887084; doi:10.1136/bmjopen-2019-030176), 2019-11-24

SM6. Impact (OR) on BP and glycaemic control of study period over previous period, unstratified (A) and stratified by insulin prescription (B and C) per month of IDC-OPD service, Mweso, DRC

A. Impact (OR) on BP and glycaemia in all patients (not stratified by insulin prescription)

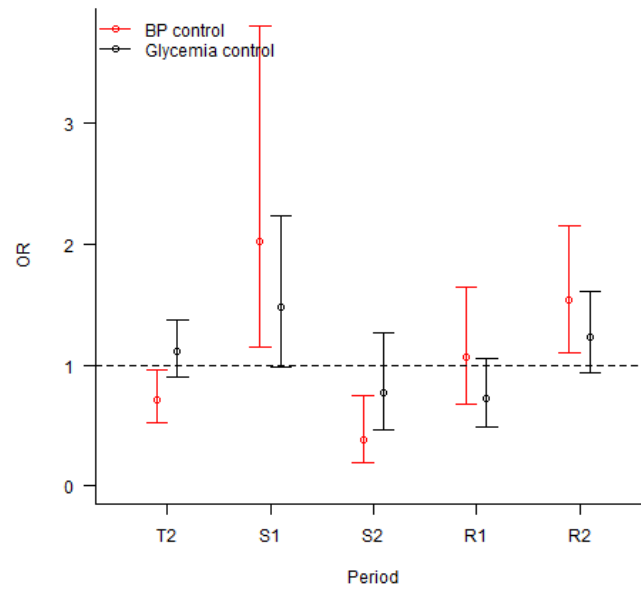

B. Impact (OR) on BP and glycaemia in patients on oral hypoglycaemic drugs only

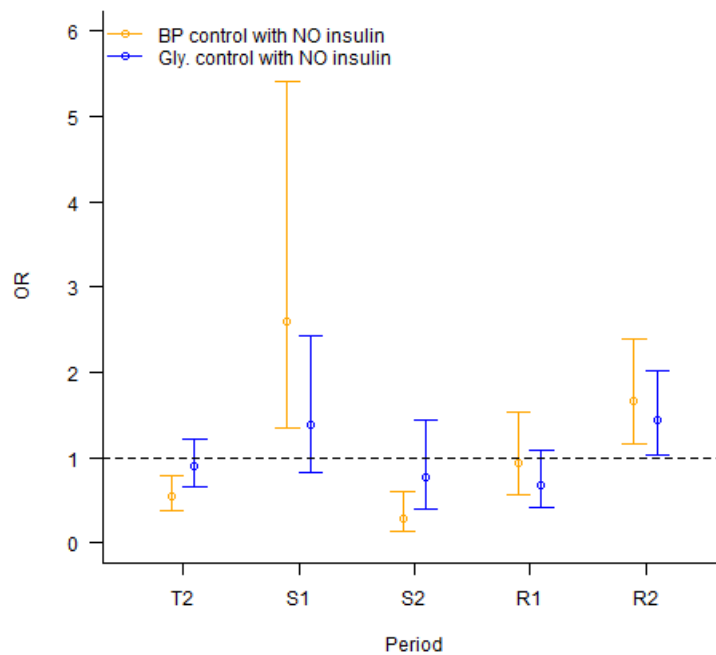

## C. Impact (OR) on BP and glycaemia in patients prescribed insulin (+/- OHG)

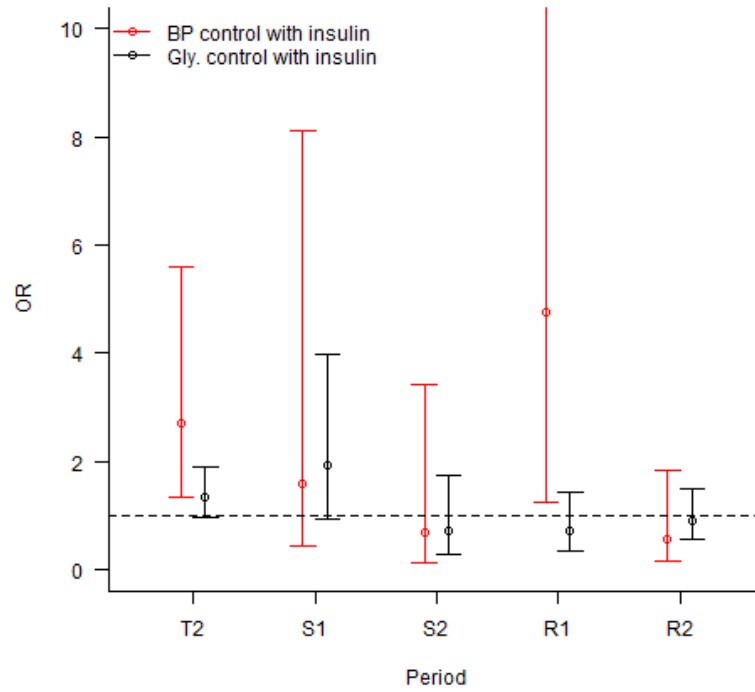

Supplement: bmjopen-2019-030176supp006.pdf [file bmjopen-2019-030176supp006.pdf]
